# Supplementary material
Source: PubMed Central journal article supplement (PMC9417056)
Supplement: NIHMS1781320-supplement-supplement.pdf [file NIHMS1781320-supplement-supplement.pdf]

**SUPPLEMENTARY MATERIALS FOR “BRIDGING RANDOMIZED  
CONTROLLED TRIALS AND SINGLE-ARM TRIALS USING  
COMMENSURATE PRIORS IN ARM-BASED NETWORK META-ANALYSIS”**

BY ZHENXUN WANG, LIFENG LIN,  
THOMAS MURRAY, JAMES S. HODGES AND HAITAO CHU

APPENDIX A: COMPLETE MOTIVATING DATASET

Xu et al. (2018) selected not only the 31 RCTs but also found 36 single-arm studies to use as a validation group in their original analysis. We excluded 9 single-arm studies because they did not provide information about treatment-related adverse events. Only 1 RCT investigated tremelimumab, which did not show a statistically significant survival advantage over standard chemotherapy in first-line treatment of patients with metastatic melanoma (Ribas et al., 2013). Moreover, tremelimumab did not have any available information from single-arm studies. Therefore, our analysis excluded tremelimumab. We also excluded 2 RCTs (Motzer et al., 2015a; Bang et al., 2017) and transformed 1 RCT (Hersh et al., 2010) into a single-arm study (by dropping one treatment arm) because the doses of ICIs investigated in these RCTs, such as nivolumab 0.3mg/kg every 3 weeks, nivolumab 2mg/kg every 3 weeks, and nivolumab 10mg/kg every 3 weeks in the RCT by Motzer et al. (2015a), did not match doses in the other RCTs. Table A1 presents the complete dataset.

Table A1: The dataset of safety of ICIs on cancer. It includes study index, author and year of each study, treatment details, number of treatment-related grade 3–5 adverse events ( $r$ ), number of patients assigned in each treatment arm ( $n$ ). ICI=immune checkpoint inhibitor; NIV=nivolumab; IPI=ipilimumab; PEM=pembrolizumab; ATE=atezolizumab; ICC=investigator’s choice chemotherapy.

| Study                | Author (year)           | Treatment                  | $r$ | $n$ |
|----------------------|-------------------------|----------------------------|-----|-----|
| Phase II or III RCT: |                         |                            |     |     |
| 1                    | Weber et al. (2017)     | NIV: 3mg/kg every 2 weeks  | 65  | 452 |
| 1                    |                         | IPI: 10mg/kg every 3 weeks | 210 | 453 |
| 2                    | Larkin et al. (2015) &  | NIV: 3mg/kg every 2 weeks  | 68  | 313 |
| 2                    | Wolchok et al. (2017)   | 2ICIs: NIV+IPI             | 186 | 311 |
| 2                    |                         | IPI: 3mg/kg every 3 weeks  | 87  | 313 |
| 3                    | Robert et al. (2015a) & | PEM: 10mg/kg every 2 weeks | 48  | 278 |
| 3                    | Schachter et al. (2017) | PEM: 10mg/kg every 3 weeks | 46  | 277 |
| 3                    |                         | IPI: 3mg/kg every 3 weeks  | 50  | 256 |
| 4                    | Rittmeyer et al. (2017) | ATE: 1200mg every 3 weeks  | 90  | 609 |
| 4                    |                         | ICC                        | 248 | 578 |
| 5                    | Weber et al. (2015) &   | NIV: 3mg/kg every 2 weeks  | 37  | 268 |
| 5                    | Larkin et al. (2018)    | ICC                        | 35  | 102 |
| 6                    | Robert et al. (2011) &  | ICI+ICC                    | 103 | 247 |
| 6                    | Maio et al. (2015)      | ICC                        | 15  | 251 |
| 7                    | Ferris et al. (2016)    | NIV: 3mg/kg every 2 weeks  | 32  | 236 |
| 7                    |                         | ICC                        | 40  | 111 |

*Continued on next page*

Table A1 – Continued from previous page

| Study             | Author (year)              | Treatment                   | <i>r</i> | <i>n</i> |
|-------------------|----------------------------|-----------------------------|----------|----------|
| 8                 | Govindan et al. (2017)     | ICI+ICC                     | 205      | 388      |
| 8                 |                            | ICC                         | 129      | 361      |
| 9                 | Motzer et al. (2015b)      | NIV: 3mg/kg every 2 weeks   | 76       | 406      |
| 9                 |                            | ICC                         | 147      | 397      |
| 10                | Carbone et al. (2017)      | NIV: 3mg/kg every 3 weeks   | 49       | 267      |
| 10                |                            | ICC                         | 136      | 263      |
| 11                | Bellmunt et al. (2017)     | PEM: 200mg every 3 weeks    | 40       | 266      |
| 11                |                            | ICC                         | 126      | 255      |
| 12                | Ascierto et al. (2017)     | IPI: 10mg/kg every 3 weeks  | 128      | 364      |
| 12                |                            | IPI: 3mg/kg every 3 weeks   | 68       | 362      |
| 13                | Reck et al. (2016a)        | PEM: 200mg every 3 weeks    | 41       | 154      |
| 13                |                            | ICC                         | 80       | 150      |
| 14                | Reck et al. (2016b)        | ICI+ICC                     | 231      | 478      |
| 14                |                            | ICC                         | 214      | 476      |
| 15                | Langer et al. (2016)       | ICI+ICC                     | 23       | 59       |
| 15                |                            | ICC                         | 16       | 62       |
| 16                | Postow et al. (2015) &     | 2ICIs: NIV+IPI              | 54       | 94       |
| 16                | Hodi et al. (2016)         | IPI: 3mg/kg every 3 weeks   | 9        | 46       |
| 17                | Herbst et al. (2016)       | PEM: 2 mg/kg every 3 weeks  | 43       | 339      |
| 17                |                            | PEM: 10 mg/kg every 3 weeks | 55       | 343      |
| 17                |                            | ICC                         | 114      | 309      |
| 18                | Fehrenbacher et al. (2016) | ATE: 1200mg every 3 weeks   | 17       | 142      |
| 18                |                            | ICC                         | 55       | 135      |
| 19                | Robert et al. (2015b)      | NIV: 3mg/kg every 2 weeks   | 24       | 206      |
| 19                |                            | ICC                         | 36       | 205      |
| 20                | Ribas et al. (2015)        | ICC                         | 45       | 171      |
| 20                |                            | PEM: 2 mg/kg every 3 weeks  | 19       | 178      |
| 20                |                            | PEM: 10 mg/kg every 3 weeks | 25       | 179      |
| 21                | Brahmer et al. (2015)      | NIV: 3mg/kg every 2 weeks   | 9        | 131      |
| 21                |                            | ICC                         | 75       | 129      |
| 22                | Borghaei et al. (2015)     | NIV: 3mg/kg every 2 weeks   | 31       | 287      |
| 22                |                            | ICC                         | 145      | 268      |
| 23                | Powles et al. (2018)       | ATE: 1200mg every 3 weeks   | 95       | 459      |
| 23                |                            | ICC                         | 198      | 443      |
| 24                | Reck et al. (2012)         | ICI+ICC                     | 40       | 84       |
| 24                |                            | ICC                         | 13       | 44       |
| 25                | Lynch et al. (2012)        | ICC                         | 25       | 65       |
| 25                |                            | ICI+ICC                     | 56       | 138      |
| 26                | Hamid et al. (2011)        | IPI: 3mg/kg every 3 weeks   | 7        | 40       |
| 26                |                            | IPI: 10mg/kg every 3 weeks  | 14       | 42       |
| 27                | Wolchok et al. (2010)      | IPI: 3mg/kg every 3 weeks   | 6        | 71       |
| 27                |                            | IPI: 10mg/kg every 3 weeks  | 18       | 71       |
| Single-arm trial: |                            |                             |          |          |
| 1                 | Giaccone et al. (2018)     | PEM: 200mg every 3 weeks    | 6        | 40       |
| 2                 | Goldberg et al. (2016)     | PEM: 10mg/kg every 2 weeks  | 5        | 36       |
| 3                 | Haag et al. (2018)         | IPI: 10mg/kg every 3 weeks  | 9        | 25       |
| 4                 | Nghiem et al. (2016)       | PEM: 2mg/kg every 3 weeks   | 4        | 26       |

Continued on next page

Table A1 – *Continued from previous page*

| Study | Author (year)                           | Treatment                  | <i>r</i> | <i>n</i> |
|-------|-----------------------------------------|----------------------------|----------|----------|
| 5     | <a href="#">Younes et al. (2016)</a>    | NIV: 3mg/kg every 2 weeks  | 20       | 80       |
| 6     | <a href="#">Amin et al. (2016)</a>      | ICI+ICC                    | 30       | 46       |
| 7     | <a href="#">Giacomo et al. (2012)</a>   | ICI+ICC                    | 47       | 86       |
| 8     | <a href="#">Hamanishi et al. (2015)</a> | NIV: 3mg/kg every 2 weeks  | 4        | 10       |
| 9     | <a href="#">Hida et al. (2017)</a>      | NIV: 3mg/kg every 2 weeks  | 2        | 35       |
| 10    | <a href="#">Kudo et al. (2017)</a>      | NIV: 3mg/kg every 2 weeks  | 11       | 65       |
| 11    | <a href="#">Maruyama et al. (2017)</a>  | NIV: 3mg/kg every 2 weeks  | 4        | 17       |
| 12    | <a href="#">Nishio et al. (2017)</a>    | NIV: 3mg/kg every 2 weeks  | 17       | 76       |
| 13    | <a href="#">Overman et al. (2018)</a>   | NIV: 3mg/kg every 2 weeks  | 15       | 74       |
| 14    | <a href="#">Sharma et al. (2017)</a>    | NIV: 3mg/kg every 2 weeks  | 51       | 270      |
| 15    | <a href="#">Yamazaki et al. (2015a)</a> | IPI: 3mg/kg every 3 weeks  | 3        | 20       |
| 16    | <a href="#">Yamazaki et al. (2017)</a>  | NIV: 3mg/kg every 2 weeks  | 3        | 23       |
| 17    | <a href="#">Yamazaki et al. (2015b)</a> | ICI+ICC                    | 11       | 15       |
| 18    | <a href="#">Zimmer et al. (2015a)</a>   | IPI: 3mg/kg every 3 weeks  | 20       | 53       |
| 19    | <a href="#">Zimmer et al. (2015b)</a>   | IPI: 3mg/kg every 3 weeks  | 20       | 103      |
| 20    | <a href="#">Balar et al. (2017)</a>     | ATE: 1200mg every 3 weeks  | 20       | 119      |
| 21    | <a href="#">Bauml et al. (2017)</a>     | PEM: 200mg every 3 weeks   | 26       | 171      |
| 22    | <a href="#">O'Day et al. (2010)</a>     | IPI: 10mg/kg every 3 weeks | 39       | 155      |
| 23    | <a href="#">Peters et al. (2017)</a>    | ATE: 1200mg every 3 weeks  | 82       | 659      |
| 24    | <a href="#">Rizvi et al. (2015)</a>     | NIV: 3mg/kg every 2 weeks  | 22       | 117      |
| 25    | <a href="#">Rosenberg et al. (2016)</a> | ATE: 1200mg every 3 weeks  | 50       | 310      |
| 26    | <a href="#">Kang et al. (2017)</a>      | NIV: 3mg/kg every 2 weeks  | 39       | 330      |
| 27    | <a href="#">Kwon et al. (2014)</a>      | IPI: 10mg/kg every 3 weeks | 145      | 393      |
| 28    | <a href="#">Hersh et al. (2010)</a>     | ICI+ICC                    | 9        | 35       |

## APPENDIX B: ADDITIONAL DETAILS OF THE PROPOSED METHODS

**B.1. Likelihood function.** The likelihood function for  $\theta_k$  based on data  $\mathcal{D}_k$  from the  $k^{\text{th}}$  RCT can be written as:

$$L(\theta_k|\mathcal{D}_k) = \prod_{t \in \mathcal{A}_k} [\text{logit}^{-1}(\theta_{kt})]^{r_{kt}} [1 - \text{logit}^{-1}(\theta_{kt})]^{n_{kt} - r_{kt}}.$$

Similarly, the likelihood function for  $\theta_{jt}^s$  based on data  $\mathcal{D}_j^s$  from the  $j^{\text{th}}$  single-arm trial is:

$$L(\theta_{jt}^s|\mathcal{D}_j^s) = \prod_{t \in \mathcal{A}_j^s} [\text{logit}^{-1}(\theta_{jt}^s)]^{r_{jt}^s} [1 - \text{logit}^{-1}(\theta_{jt}^s)]^{n_{jt}^s - r_{jt}^s}.$$

Since  $|\mathcal{A}_j^s| = 1$ , we can simply denote  $\theta_{jt}^s$  by  $\theta_j^s$ . Without loss of generality, we focus on illustrating the joint posterior distribution under the DCP model. Noting that  $\Sigma$  depends on  $\Delta$  and  $\rho$ , the joint posterior distribution can be written as:

(1)

$$\begin{aligned} & \pi(\boldsymbol{\mu}, \Delta, \boldsymbol{\mu}^s, \boldsymbol{\sigma}^s, \rho, \boldsymbol{\theta}_1, \dots, \boldsymbol{\theta}_K, \boldsymbol{\theta}^s, \boldsymbol{\kappa}^m, \boldsymbol{\tau}^m, \boldsymbol{\kappa}^v, \boldsymbol{\tau}^v | \mathcal{D}_{1:K}, \mathcal{D}_{1:J}^s) \\ & \propto \prod_{k=1}^K \left\{ \prod_{t \in \mathcal{A}_k} [\text{logit}^{-1}(\theta_{kt})]^{r_{kt}} [1 - \text{logit}^{-1}(\theta_{kt})]^{n_{kt} - r_{kt}} |\Sigma|^{-\frac{1}{2}} e^{-\frac{1}{2}(\boldsymbol{\theta}_k - \boldsymbol{\mu})' \Sigma^{-1} (\boldsymbol{\theta}_k - \boldsymbol{\mu})} \right\} \times \\ & \prod_{j=1}^J \left\{ \prod_{t \in \mathcal{A}_j^s} [\text{logit}^{-1}(\theta_{jt}^s)]^{r_{jt}^s} [1 - \text{logit}^{-1}(\theta_{jt}^s)]^{(n_{jt}^s - r_{jt}^s)} (\sigma_t^s)^{-1} e^{-\frac{1}{2} \left( \frac{\theta_{jt}^s - \mu_t^s}{\sigma_t^s} \right)^2} \right\} \times \\ & \prod_{t=1}^T \left\{ [(\tau_t^m)^{\frac{1}{2}} e^{-\frac{1}{2} \tau_t^m (\mu_t - \mu_t^s)^2}]^{(1 - \kappa_t^m)} [(R^m)^{\frac{1}{2}} e^{-\frac{1}{2} R^m (\mu_t - \mu_t^s)^2}]^{\kappa_t^m} \right\} \times \\ & \prod_{t=1}^T \left\{ [(\tau_t^v)^{\frac{1}{2}} \sigma_t^{-1} e^{-\frac{1}{2} \tau_t^v (\log(\sigma_t) - \log(\sigma_t^s))^2}]^{1 - \kappa_t^v} [(R^v)^{\frac{1}{2}} \sigma_t^{-1} e^{-\frac{1}{2} R^v (\log(\sigma_t) - \log(\sigma_t^s))^2}]^{\kappa_t^v} \right\} \times \\ & \prod_{t=1}^T [\pi(\mu_t^s) \pi(\sigma_t^s) \pi(\kappa_t^m) \pi(\tau_t^m) \pi(\kappa_t^v) \pi(\tau_t^v)] \times \pi(\rho), \end{aligned}$$

where  $\mathcal{D}_{1:K} = \{\mathcal{D}_1, \dots, \mathcal{D}_K\}$ ,  $\mathcal{D}_{1:J}^s = \{\mathcal{D}_1^s, \dots, \mathcal{D}_J^s\}$ ,  $\boldsymbol{\theta}^s = (\theta_1^s, \dots, \theta_J^s)'$ ,  $\boldsymbol{\kappa}^m = (\kappa_1^m, \dots, \kappa_T^m)'$ ,  $\boldsymbol{\tau}^m = (\tau_1^m, \dots, \tau_T^m)'$ ,  $\boldsymbol{\kappa}^v = (\kappa_1^v, \dots, \kappa_T^v)'$ , and  $\boldsymbol{\tau}^v = (\tau_1^v, \dots, \tau_T^v)'$ .

**B.2. LPML Derivation.** As a measure of the model's predictive ability, the LPML can be written as:

$$\text{LPML} = \sum_{k=1}^K \log(\text{CPO}_k);$$

$$\text{CPO}_k = f(\mathcal{D}_k | \mathcal{D}_{-k}, \mathcal{D}_{1:J}^s),$$

where  $\text{CPO}_k$  is the conditional predictive ordinate of the  $k^{\text{th}}$  RCT based on the remaining  $\mathcal{D}_{-k} = \{\mathcal{D}_l : l \neq k\}$  and on the full data from the single-arm trials  $\mathcal{D}_{1:J}^s$ .

Let  $\boldsymbol{\psi}$  represent all unknown parameters  $\boldsymbol{\mu}, \Delta, \boldsymbol{\mu}^s, \boldsymbol{\sigma}^s, \rho, \boldsymbol{\theta}_1, \dots, \boldsymbol{\theta}_K, \boldsymbol{\theta}^s, \boldsymbol{\kappa}^m, \boldsymbol{\tau}^m, \boldsymbol{\kappa}^v$ , and  $\boldsymbol{\tau}^v$ ; also, let  $\boldsymbol{\psi}_{-k}$  represent all the unknown parameters except  $\theta_k$ . Then  $\text{CPO}_k$  can be written

as:

$$\begin{aligned}
 & E \left[ \frac{1}{f(\mathcal{D}_k | \boldsymbol{\theta}_k, \boldsymbol{\psi}_{-k})} \right] \\
 &= \int \frac{\pi(\boldsymbol{\theta}_k, \boldsymbol{\psi}_{-k} | \mathcal{D}_{1:K}, \mathcal{D}_{1:J}^s)}{f(\mathcal{D}_k | \boldsymbol{\theta}_k, \boldsymbol{\psi}_{-k})} d\boldsymbol{\theta}_k d\boldsymbol{\psi}_{-k} \\
 &= \int \frac{f(\mathcal{D}_{1:K}, \mathcal{D}_{1:J}^s | \boldsymbol{\theta}_k, \boldsymbol{\psi}_{-k}) \pi(\boldsymbol{\theta}_k) \pi(\boldsymbol{\psi}_{-k})}{f(\mathcal{D}_k | \boldsymbol{\theta}_k, \boldsymbol{\psi}_{-k}) f(\mathcal{D}_{1:K}, \mathcal{D}_{1:J}^s)} d\boldsymbol{\theta}_k d\boldsymbol{\psi}_{-k} \\
 &= \int \frac{f(\mathcal{D}_{-k}, \mathcal{D}_{1:J}^s | \boldsymbol{\psi}_{-k}) f(\mathcal{D}_k | \boldsymbol{\theta}_k, \boldsymbol{\psi}_{-k}) \pi(\boldsymbol{\theta}_k) \pi(\boldsymbol{\psi}_{-k})}{f(\mathcal{D}_k | \boldsymbol{\theta}_k, \boldsymbol{\psi}_{-k}) f(\mathcal{D}_{1:K}, \mathcal{D}_{1:J}^s)} d\boldsymbol{\theta}_k d\boldsymbol{\psi}_{-k} \\
 &= \int \frac{f(\mathcal{D}_{-k}, \mathcal{D}_{1:J}^s | \boldsymbol{\psi}_{-k}) \pi(\boldsymbol{\psi}_{-k})}{f(\mathcal{D}_{1:K}, \mathcal{D}_{1:J}^s)} d\boldsymbol{\psi}_{-k} \\
 &= \frac{f(\mathcal{D}_{-k}, \mathcal{D}_{1:J}^s)}{f(\mathcal{D}_{1:K}, \mathcal{D}_{1:J}^s)} = \frac{1}{f(\mathcal{D}_k | \mathcal{D}_{-k}, \mathcal{D}_{1:J}^s)} = \frac{1}{\text{CPO}_k},
 \end{aligned}$$

where  $\pi(\boldsymbol{\theta}_k, \boldsymbol{\psi}_{-k} | \mathcal{D}_{1:K}, \mathcal{D}_{1:J}^s)$  is the joint posterior distribution in Equation (1). Let  $\{\boldsymbol{\psi}_c, c = 1, \dots, C\}$  denote the MCMC samples of  $\boldsymbol{\psi}$  from this joint posterior distribution. Then  $\text{CPO}_k$  can be approximated by

$$\left( \frac{1}{C} \sum_{c=1}^C \frac{1}{f(\mathcal{D}_k | \boldsymbol{\psi}_c)} \right)^{-1}.$$

## APPENDIX C: DETAILS OF SIMULATION RESULTS

**C.1. Bias.** Tables C1–C8 provide the estimated bias and the Monte Carlo standard error of the posterior median for the five methods (NB, CPV, FBV, CPM, and DCP) using different data-generating mechanisms (EM-EV, UM-EV, EM-UV, and UM-UV) and missingness structures (MCAR and MAR).

TABLE C1

*Simulation results comparing data generated under the EM-EV scenario with MCAR missingness of treatment arms. The estimated bias and the Monte Carlo standard error of the posterior median are rounded to 3 decimal places for the five methods (NB, CPV, FBV, CPM, and DCP).*

| Parameter          | Truth | Bias (Monte Carlo standard error) |                |                |                |                |
|--------------------|-------|-----------------------------------|----------------|----------------|----------------|----------------|
|                    |       | NB                                | CPV            | FBV            | CPM            | DCP            |
| cLOR <sub>12</sub> | 1.00  | 0.068 (0.016)                     | 0.051 (0.016)  | 0.066 (0.016)  | 0.055 (0.013)  | 0.059 (0.013)  |
| cLOR <sub>13</sub> | 0.50  | 0.109 (0.026)                     | 0.099 (0.025)  | 0.103 (0.025)  | 0.050 (0.016)  | 0.065 (0.017)  |
| cLOR <sub>14</sub> | 0.00  | 0.029 (0.007)                     | 0.026 (0.007)  | 0.029 (0.007)  | 0.018 (0.005)  | 0.016 (0.005)  |
| cLOR <sub>15</sub> | -0.50 | 0.000 (0.007)                     | 0.002 (0.007)  | 0.005 (0.007)  | -0.002 (0.005) | -0.003 (0.005) |
| cLOR <sub>23</sub> | -0.50 | 0.026 (0.031)                     | 0.038 (0.031)  | 0.026 (0.031)  | -0.010 (0.022) | 0.001 (0.022)  |
| cLOR <sub>24</sub> | -1.00 | -0.042 (0.018)                    | -0.026 (0.017) | -0.038 (0.017) | -0.038 (0.014) | -0.044 (0.014) |
| cLOR <sub>25</sub> | -1.50 | -0.076 (0.019)                    | -0.052 (0.018) | -0.064 (0.018) | -0.060 (0.014) | -0.064 (0.015) |
| cLOR <sub>34</sub> | -0.50 | -0.079 (0.027)                    | -0.072 (0.026) | -0.073 (0.026) | -0.032 (0.017) | -0.049 (0.018) |
| cLOR <sub>35</sub> | -1.00 | -0.111 (0.027)                    | -0.097 (0.026) | -0.098 (0.026) | -0.054 (0.017) | -0.069 (0.018) |
| cLOR <sub>45</sub> | -0.50 | -0.031 (0.010)                    | -0.024 (0.009) | -0.024 (0.009) | -0.021 (0.006) | -0.019 (0.006) |
| $\mu_1$            | -2.00 | -0.003 (0.004)                    | 0.005 (0.004)  | 0.007 (0.004)  | -0.005 (0.003) | -0.003 (0.003) |
| $\mu_2$            | -3.00 | -0.074 (0.017)                    | -0.047 (0.016) | -0.061 (0.016) | -0.060 (0.014) | -0.063 (0.014) |
| $\mu_3$            | -2.50 | -0.115 (0.026)                    | -0.096 (0.026) | -0.098 (0.025) | -0.056 (0.016) | -0.070 (0.017) |
| $\mu_4$            | -2.00 | -0.033 (0.006)                    | -0.022 (0.006) | -0.022 (0.006) | -0.023 (0.004) | -0.019 (0.004) |
| $\mu_5$            | -1.50 | -0.004 (0.007)                    | 0.002 (0.006)  | 0.001 (0.006)  | -0.003 (0.005) | -0.001 (0.005) |
| $p_1$              | 0.12  | 0.002 (0.000)                     | 0.000 (0.000)  | 0.000 (0.000)  | 0.002 (0.000)  | -0.001 (0.000) |
| $p_2$              | 0.07  | 0.019 (0.001)                     | 0.010 (0.001)  | 0.013 (0.001)  | 0.017 (0.001)  | 0.006 (0.001)  |
| $p_3$              | 0.10  | 0.038 (0.002)                     | 0.020 (0.002)  | 0.026 (0.002)  | 0.035 (0.002)  | 0.011 (0.002)  |
| $p_4$              | 0.12  | 0.005 (0.001)                     | 0.000 (0.001)  | 0.000 (0.001)  | 0.004 (0.000)  | -0.001 (0.000) |
| $p_5$              | 0.19  | 0.014 (0.001)                     | 0.004 (0.001)  | 0.004 (0.001)  | 0.010 (0.001)  | 0.002 (0.001)  |
| $\delta_1$         | 0.40  | 0.033 (0.004)                     | -0.051 (0.003) | -0.063 (0.003) | 0.030 (0.004)  | -0.054 (0.003) |
| $\delta_2$         | 1.00  | 0.337 (0.020)                     | 0.120 (0.016)  | 0.208 (0.016)  | 0.283 (0.019)  | 0.068 (0.015)  |
| $\delta_3$         | 1.00  | 0.736 (0.022)                     | 0.229 (0.021)  | 0.331 (0.021)  | 0.487 (0.021)  | 0.088 (0.017)  |
| $\delta_4$         | 0.30  | 0.152 (0.007)                     | -0.051 (0.005) | -0.037 (0.004) | 0.102 (0.006)  | -0.066 (0.004) |
| $\delta_5$         | 0.30  | 0.263 (0.010)                     | -0.011 (0.006) | 0.007 (0.005)  | 0.162 (0.008)  | -0.039 (0.005) |
| $\rho$             | 0.50  | 0.005 (0.007)                     | -0.026 (0.007) | -0.033 (0.007) | 0.016 (0.007)  | -0.016 (0.007) |

TABLE C2

Simulation results comparing data generated under the EM-EV scenario with MAR missingness of treatment arms. The estimated bias and the Monte Carlo standard error of the posterior median are rounded to 3 decimal places for the five methods (NB, CPV, FBV, CPM, and DCP).

| Parameter          | Truth | Bias (Monte Carlo standard error) |                |                |                |                |
|--------------------|-------|-----------------------------------|----------------|----------------|----------------|----------------|
|                    |       | NB                                | CPV            | FBV            | CPM            | DCP            |
| cLOR <sub>12</sub> | 1.00  | 0.190 (0.019)                     | 0.012 (0.017)  | 0.073 (0.017)  | 0.093 (0.015)  | 0.025 (0.014)  |
| cLOR <sub>13</sub> | 0.50  | 0.119 (0.025)                     | 0.071 (0.024)  | 0.081 (0.024)  | 0.054 (0.016)  | 0.053 (0.016)  |
| cLOR <sub>14</sub> | 0.00  | -0.012 (0.007)                    | 0.034 (0.007)  | 0.033 (0.007)  | 0.005 (0.005)  | 0.024 (0.005)  |
| cLOR <sub>15</sub> | -0.50 | -0.115 (0.009)                    | 0.058 (0.008)  | 0.048 (0.008)  | -0.012 (0.005) | 0.049 (0.006)  |
| cLOR <sub>23</sub> | -0.50 | -0.128 (0.030)                    | 0.030 (0.029)  | -0.029 (0.029) | -0.057 (0.021) | 0.015 (0.021)  |
| cLOR <sub>24</sub> | -1.00 | -0.230 (0.020)                    | 0.021 (0.018)  | -0.041 (0.018) | -0.092 (0.015) | -0.001 (0.015) |
| cLOR <sub>25</sub> | -1.50 | -0.407 (0.023)                    | 0.026 (0.019)  | -0.048 (0.019) | -0.127 (0.015) | 0.014 (0.015)  |
| cLOR <sub>34</sub> | -0.50 | -0.157 (0.026)                    | -0.042 (0.025) | -0.052 (0.025) | -0.054 (0.017) | -0.030 (0.017) |
| cLOR <sub>35</sub> | -1.00 | -0.345 (0.027)                    | -0.040 (0.025) | -0.062 (0.025) | -0.090 (0.016) | -0.015 (0.017) |
| cLOR <sub>45</sub> | -0.50 | -0.114 (0.010)                    | 0.022 (0.009)  | 0.012 (0.009)  | -0.019 (0.006) | 0.024 (0.007)  |
| $\mu_1$            | -2.00 | -0.004 (0.004)                    | 0.005 (0.004)  | 0.007 (0.004)  | -0.008 (0.003) | -0.003 (0.003) |
| $\mu_2$            | -3.00 | -0.181 (0.019)                    | 0.002 (0.017)  | -0.057 (0.018) | -0.096 (0.015) | -0.024 (0.014) |
| $\mu_3$            | -2.50 | -0.123 (0.025)                    | -0.067 (0.025) | -0.075 (0.024) | -0.063 (0.016) | -0.056 (0.016) |
| $\mu_4$            | -2.00 | -0.002 (0.006)                    | -0.033 (0.006) | -0.030 (0.006) | -0.016 (0.004) | -0.029 (0.005) |
| $\mu_5$            | -1.50 | 0.088 (0.008)                     | -0.064 (0.007) | -0.052 (0.007) | -0.002 (0.005) | -0.056 (0.005) |
| $p_1$              | 0.12  | 0.002 (0.000)                     | 0.000 (0.000)  | 0.000 (0.000)  | 0.001 (0.000)  | -0.001 (0.000) |
| $p_2$              | 0.07  | 0.015 (0.001)                     | 0.012 (0.001)  | 0.012 (0.001)  | 0.015 (0.001)  | 0.008 (0.001)  |
| $p_3$              | 0.10  | 0.042 (0.002)                     | 0.024 (0.002)  | 0.029 (0.002)  | 0.041 (0.002)  | 0.014 (0.001)  |
| $p_4$              | 0.12  | 0.010 (0.001)                     | -0.002 (0.001) | -0.001 (0.001) | 0.006 (0.001)  | -0.002 (0.000) |
| $p_5$              | 0.19  | 0.030 (0.002)                     | -0.006 (0.001) | -0.004 (0.001) | 0.010 (0.001)  | -0.006 (0.001) |
| $\delta_1$         | 0.40  | 0.033 (0.004)                     | -0.052 (0.003) | -0.064 (0.003) | 0.029 (0.004)  | -0.055 (0.003) |
| $\delta_2$         | 1.00  | 0.376 (0.020)                     | 0.111 (0.015)  | 0.197 (0.015)  | 0.277 (0.017)  | 0.063 (0.014)  |
| $\delta_3$         | 1.00  | 0.906 (0.022)                     | 0.293 (0.021)  | 0.379 (0.020)  | 0.624 (0.021)  | 0.139 (0.017)  |
| $\delta_4$         | 0.30  | 0.200 (0.009)                     | -0.058 (0.005) | -0.042 (0.004) | 0.125 (0.007)  | -0.077 (0.004) |
| $\delta_5$         | 0.30  | 0.319 (0.010)                     | -0.012 (0.005) | 0.010 (0.005)  | 0.161 (0.007)  | -0.043 (0.005) |
| $\rho$             | 0.50  | 0.082 (0.006)                     | -0.061 (0.006) | -0.051 (0.006) | 0.033 (0.006)  | -0.051 (0.006) |

TABLE C3

Simulation results comparing data generated under the UM-EV scenario with MCAR missingness of treatment arms. The estimated bias and the Monte Carlo standard error of the posterior median are rounded to 3 decimal places for the five methods (NB, CPV, FBV, CPM, and DCP).

| Parameter          | Truth | Bias (Monte Carlo standard error) |                |                |                |                |
|--------------------|-------|-----------------------------------|----------------|----------------|----------------|----------------|
|                    |       | NB                                | CPV            | FBV            | CPM            | DCP            |
| cLOR <sub>12</sub> | 1.00  | 0.068 (0.016)                     | 0.048 (0.016)  | 0.066 (0.016)  | -0.087 (0.013) | -0.058 (0.013) |
| cLOR <sub>13</sub> | 0.50  | 0.108 (0.026)                     | 0.100 (0.025)  | 0.107 (0.025)  | -0.209 (0.016) | -0.127 (0.017) |
| cLOR <sub>14</sub> | 0.00  | 0.029 (0.007)                     | 0.029 (0.007)  | 0.035 (0.007)  | 0.171 (0.007)  | 0.129 (0.007)  |
| cLOR <sub>15</sub> | -0.50 | 0.000 (0.007)                     | 0.004 (0.007)  | 0.009 (0.007)  | 0.151 (0.007)  | 0.107 (0.007)  |
| cLOR <sub>23</sub> | -0.50 | 0.026 (0.031)                     | 0.042 (0.030)  | 0.031 (0.030)  | -0.123 (0.021) | -0.076 (0.021) |
| cLOR <sub>24</sub> | -1.00 | -0.042 (0.018)                    | -0.020 (0.017) | -0.032 (0.017) | 0.263 (0.014)  | 0.189 (0.014)  |
| cLOR <sub>25</sub> | -1.50 | -0.076 (0.019)                    | -0.048 (0.018) | -0.059 (0.018) | 0.246 (0.014)  | 0.168 (0.014)  |
| cLOR <sub>34</sub> | -0.50 | -0.078 (0.027)                    | -0.070 (0.026) | -0.071 (0.026) | 0.386 (0.017)  | 0.260 (0.018)  |
| cLOR <sub>35</sub> | -1.00 | -0.111 (0.027)                    | -0.097 (0.026) | -0.097 (0.026) | 0.370 (0.017)  | 0.241 (0.017)  |
| cLOR <sub>45</sub> | -0.50 | -0.031 (0.010)                    | -0.026 (0.009) | -0.026 (0.009) | -0.019 (0.008) | -0.022 (0.009) |
| $\mu_1$            | -2.00 | -0.003 (0.004)                    | 0.007 (0.004)  | 0.011 (0.004)  | 0.009 (0.004)  | 0.017 (0.004)  |
| $\mu_2$            | -3.00 | -0.073 (0.017)                    | -0.043 (0.016) | -0.057 (0.016) | 0.096 (0.013)  | 0.074 (0.013)  |
| $\mu_3$            | -2.50 | -0.114 (0.026)                    | -0.095 (0.026) | -0.098 (0.025) | 0.219 (0.016)  | 0.143 (0.017)  |
| $\mu_4$            | -2.00 | -0.033 (0.006)                    | -0.023 (0.006) | -0.024 (0.006) | -0.163 (0.006) | -0.113 (0.006) |
| $\mu_5$            | -1.50 | -0.004 (0.007)                    | 0.002 (0.007)  | 0.001 (0.007)  | -0.141 (0.006) | -0.090 (0.006) |
| $p_1$              | 0.12  | 0.002 (0.000)                     | 0.000 (0.000)  | 0.000 (0.000)  | 0.003 (0.000)  | 0.001 (0.000)  |
| $p_2$              | 0.07  | 0.019 (0.001)                     | 0.009 (0.001)  | 0.011 (0.001)  | 0.027 (0.001)  | 0.013 (0.001)  |
| $p_3$              | 0.10  | 0.038 (0.002)                     | 0.019 (0.002)  | 0.024 (0.002)  | 0.062 (0.002)  | 0.030 (0.002)  |
| $p_4$              | 0.12  | 0.005 (0.001)                     | 0.000 (0.001)  | 0.000 (0.001)  | -0.006 (0.001) | -0.009 (0.001) |
| $p_5$              | 0.19  | 0.014 (0.001)                     | 0.004 (0.001)  | 0.005 (0.001)  | -0.003 (0.001) | -0.008 (0.001) |
| $\delta_1$         | 0.40  | 0.033 (0.004)                     | -0.064 (0.004) | -0.093 (0.003) | 0.032 (0.004)  | -0.065 (0.004) |
| $\delta_2$         | 1.00  | 0.337 (0.020)                     | 0.095 (0.015)  | 0.172 (0.014)  | 0.279 (0.019)  | 0.060 (0.014)  |
| $\delta_3$         | 1.00  | 0.737 (0.022)                     | 0.196 (0.020)  | 0.278 (0.019)  | 0.521 (0.022)  | 0.093 (0.016)  |
| $\delta_4$         | 0.30  | 0.153 (0.007)                     | -0.033 (0.005) | -0.014 (0.004) | 0.164 (0.007)  | -0.016 (0.005) |
| $\delta_5$         | 0.30  | 0.263 (0.010)                     | 0.004 (0.006)  | 0.026 (0.005)  | 0.237 (0.008)  | 0.017 (0.005)  |
| $\rho$             | 0.50  | 0.004 (0.007)                     | -0.028 (0.007) | -0.040 (0.007) | 0.001 (0.007)  | -0.031 (0.007) |



TABLE C4

*Simulation results comparing data generated under the UM-EV scenario with MAR missingness of treatment arms. The estimated bias and the Monte Carlo standard error of the posterior median are rounded to 3 decimal places for the five methods (NB, CPV, FBV, CPM, and DCP).*

| Parameter          | Truth | Bias (Monte Carlo standard error) |                |                |                |                |
|--------------------|-------|-----------------------------------|----------------|----------------|----------------|----------------|
|                    |       | NB                                | CPV            | FBV            | CPM            | DCP            |
| cLOR <sub>12</sub> | 1.00  | 0.190 (0.019)                     | 0.005 (0.016)  | 0.067 (0.017)  | -0.160 (0.013) | -0.185 (0.013) |
| cLOR <sub>13</sub> | 0.50  | 0.118 (0.025)                     | 0.071 (0.024)  | 0.080 (0.024)  | -0.209 (0.016) | -0.146 (0.016) |
| cLOR <sub>14</sub> | 0.00  | -0.012 (0.007)                    | 0.033 (0.007)  | 0.035 (0.007)  | 0.169 (0.007)  | 0.148 (0.007)  |
| cLOR <sub>15</sub> | -0.50 | -0.115 (0.009)                    | 0.054 (0.008)  | 0.046 (0.008)  | 0.179 (0.007)  | 0.200 (0.007)  |
| cLOR <sub>23</sub> | -0.50 | -0.129 (0.030)                    | 0.039 (0.029)  | -0.019 (0.028) | -0.064 (0.020) | 0.024 (0.020)  |
| cLOR <sub>24</sub> | -1.00 | -0.229 (0.020)                    | 0.026 (0.018)  | -0.036 (0.018) | 0.334 (0.014)  | 0.336 (0.014)  |
| cLOR <sub>25</sub> | -1.50 | -0.406 (0.023)                    | 0.026 (0.019)  | -0.048 (0.019) | 0.338 (0.015)  | 0.385 (0.014)  |
| cLOR <sub>34</sub> | -0.50 | -0.156 (0.026)                    | -0.042 (0.025) | -0.051 (0.025) | 0.380 (0.017)  | 0.296 (0.017)  |
| cLOR <sub>35</sub> | -1.00 | -0.344 (0.027)                    | -0.046 (0.025) | -0.067 (0.025) | 0.377 (0.017)  | 0.342 (0.017)  |
| cLOR <sub>45</sub> | -0.50 | -0.114 (0.010)                    | 0.017 (0.009)  | 0.007 (0.009)  | 0.005 (0.008)  | 0.050 (0.008)  |
| $\mu_1$            | -2.00 | -0.004 (0.004)                    | 0.007 (0.004)  | 0.011 (0.004)  | 0.011 (0.004)  | 0.019 (0.004)  |
| $\mu_2$            | -3.00 | -0.181 (0.019)                    | 0.010 (0.017)  | -0.049 (0.017) | 0.181 (0.013)  | 0.211 (0.013)  |
| $\mu_3$            | -2.50 | -0.122 (0.025)                    | -0.065 (0.025) | -0.070 (0.024) | 0.221 (0.016)  | 0.165 (0.016)  |
| $\mu_4$            | -2.00 | -0.003 (0.006)                    | -0.032 (0.006) | -0.028 (0.006) | -0.162 (0.006) | -0.131 (0.006) |
| $\mu_5$            | -1.50 | 0.088 (0.008)                     | -0.059 (0.007) | -0.044 (0.007) | -0.176 (0.006) | -0.186 (0.006) |
| $p_1$              | 0.12  | 0.002 (0.000)                     | 0.000 (0.000)  | 0.000 (0.000)  | 0.003 (0.000)  | 0.002 (0.000)  |
| $p_2$              | 0.07  | 0.015 (0.001)                     | 0.012 (0.001)  | 0.011 (0.001)  | 0.028 (0.001)  | 0.020 (0.001)  |
| $p_3$              | 0.10  | 0.043 (0.002)                     | 0.023 (0.002)  | 0.027 (0.002)  | 0.065 (0.002)  | 0.032 (0.002)  |
| $p_4$              | 0.12  | 0.010 (0.001)                     | -0.001 (0.001) | 0.000 (0.001)  | -0.006 (0.001) | -0.011 (0.001) |
| $p_5$              | 0.19  | 0.030 (0.002)                     | -0.004 (0.001) | -0.002 (0.001) | -0.012 (0.001) | -0.023 (0.001) |
| $\delta_1$         | 0.40  | 0.034 (0.004)                     | -0.065 (0.004) | -0.093 (0.003) | 0.027 (0.004)  | -0.067 (0.004) |
| $\delta_2$         | 1.00  | 0.376 (0.020)                     | 0.087 (0.014)  | 0.162 (0.014)  | 0.200 (0.017)  | 0.014 (0.013)  |
| $\delta_3$         | 1.00  | 0.905 (0.022)                     | 0.258 (0.020)  | 0.322 (0.019)  | 0.577 (0.021)  | 0.116 (0.016)  |
| $\delta_4$         | 0.30  | 0.200 (0.009)                     | -0.038 (0.005) | -0.016 (0.004) | 0.152 (0.007)  | -0.033 (0.005) |
| $\delta_5$         | 0.30  | 0.320 (0.010)                     | 0.005 (0.006)  | 0.032 (0.005)  | 0.170 (0.008)  | -0.021 (0.005) |
| $\rho$             | 0.50  | 0.081 (0.006)                     | -0.061 (0.006) | -0.055 (0.006) | -0.154 (0.006) | -0.213 (0.006) |

TABLE C5

*Simulation results comparing data generated under the EM-UV scenario with MCAR missingness of treatment arms. The estimated bias and the Monte Carlo standard error of the posterior median are rounded to 3 decimal places for the five methods (NB, CPV, FBV, CPM, and DCP).*

| Parameter          | Truth | Bias (Monte Carlo standard error) |                |                |                |                |
|--------------------|-------|-----------------------------------|----------------|----------------|----------------|----------------|
|                    |       | NB                                | CPV            | FBV            | CPM            | DCP            |
| cLOR <sub>12</sub> | 1.00  | 0.068 (0.016)                     | 0.017 (0.015)  | -0.021 (0.015) | 0.087 (0.012)  | 0.067 (0.012)  |
| cLOR <sub>13</sub> | 0.50  | 0.108 (0.026)                     | 0.059 (0.024)  | 0.015 (0.024)  | 0.054 (0.011)  | 0.036 (0.016)  |
| cLOR <sub>14</sub> | 0.00  | 0.029 (0.007)                     | 0.029 (0.007)  | 0.008 (0.007)  | 0.024 (0.006)  | 0.024 (0.006)  |
| cLOR <sub>15</sub> | -0.50 | 0.000 (0.007)                     | -0.003 (0.007) | -0.029 (0.008) | 0.000 (0.007)  | -0.006 (0.007) |
| cLOR <sub>23</sub> | -0.50 | 0.026 (0.031)                     | 0.037 (0.029)  | 0.033 (0.029)  | -0.038 (0.016) | -0.034 (0.020) |
| cLOR <sub>24</sub> | -1.00 | -0.041 (0.018)                    | 0.010 (0.017)  | 0.027 (0.017)  | -0.066 (0.013) | -0.047 (0.014) |
| cLOR <sub>25</sub> | -1.50 | -0.075 (0.019)                    | -0.026 (0.017) | -0.012 (0.017) | -0.092 (0.014) | -0.078 (0.014) |
| cLOR <sub>34</sub> | -0.50 | -0.078 (0.027)                    | -0.030 (0.025) | -0.008 (0.025) | -0.030 (0.012) | -0.014 (0.017) |
| cLOR <sub>35</sub> | -1.00 | -0.111 (0.027)                    | -0.066 (0.025) | -0.046 (0.025) | -0.056 (0.012) | -0.045 (0.017) |
| cLOR <sub>45</sub> | -0.50 | -0.031 (0.010)                    | -0.034 (0.009) | -0.038 (0.010) | -0.025 (0.009) | -0.030 (0.009) |
| $\mu_1$            | -2.00 | -0.003 (0.004)                    | -0.005 (0.004) | -0.038 (0.004) | -0.005 (0.004) | -0.007 (0.004) |
| $\mu_2$            | -3.00 | -0.073 (0.017)                    | -0.023 (0.016) | -0.013 (0.016) | -0.093 (0.012) | -0.076 (0.012) |
| $\mu_3$            | -2.50 | -0.114 (0.026)                    | -0.065 (0.025) | -0.048 (0.024) | -0.060 (0.010) | -0.044 (0.016) |
| $\mu_4$            | -2.00 | -0.033 (0.006)                    | -0.035 (0.006) | -0.044 (0.007) | -0.030 (0.006) | -0.032 (0.006) |
| $\mu_5$            | -1.50 | -0.004 (0.007)                    | -0.003 (0.007) | -0.007 (0.007) | -0.006 (0.007) | -0.003 (0.006) |
| $p_1$              | 0.12  | 0.002 (0.000)                     | 0.002 (0.000)  | 0.024 (0.001)  | 0.002 (0.000)  | 0.002 (0.000)  |
| $p_2$              | 0.07  | 0.019 (0.001)                     | 0.008 (0.001)  | 0.016 (0.001)  | 0.014 (0.001)  | 0.001 (0.001)  |
| $p_3$              | 0.10  | 0.038 (0.002)                     | 0.006 (0.002)  | 0.008 (0.002)  | 0.030 (0.001)  | -0.003 (0.002) |
| $p_4$              | 0.12  | 0.005 (0.001)                     | 0.004 (0.001)  | 0.014 (0.001)  | 0.005 (0.001)  | 0.004 (0.001)  |
| $p_5$              | 0.19  | 0.014 (0.001)                     | 0.010 (0.001)  | 0.022 (0.001)  | 0.013 (0.001)  | 0.010 (0.001)  |
| $\delta_1$         | 0.40  | 0.033 (0.004)                     | 0.037 (0.004)  | 0.610 (0.007)  | 0.033 (0.004)  | 0.034 (0.004)  |
| $\delta_2$         | 1.00  | 0.337 (0.020)                     | 0.020 (0.015)  | 0.185 (0.017)  | 0.267 (0.018)  | -0.032 (0.014) |
| $\delta_3$         | 1.00  | 0.737 (0.022)                     | -0.216 (0.019) | -0.186 (0.017) | 0.427 (0.021)  | -0.297 (0.015) |
| $\delta_4$         | 0.30  | 0.153 (0.007)                     | 0.163 (0.007)  | 0.427 (0.010)  | 0.132 (0.007)  | 0.148 (0.006)  |
| $\delta_5$         | 0.30  | 0.264 (0.010)                     | 0.213 (0.008)  | 0.466 (0.012)  | 0.212 (0.009)  | 0.183 (0.007)  |
| $\rho$             | 0.50  | 0.005 (0.007)                     | -0.013 (0.007) | 0.107 (0.007)  | 0.014 (0.007)  | -0.008 (0.007) |

TABLE C6

*Simulation results comparing data generated under the EM-UV scenario with MAR missingness of treatment arms. The estimated bias and the Monte Carlo standard error of the posterior median are rounded to 3 decimal places for the five methods (NB, CPV, FBV, CPM, and DCP).*

| Parameter          | Truth | Bias (Monte Carlo standard error) |                |                |                |                |
|--------------------|-------|-----------------------------------|----------------|----------------|----------------|----------------|
|                    |       | NB                                | CPV            | FBV            | CPM            | DCP            |
| cLOR <sub>12</sub> | 1.00  | 0.190 (0.019)                     | -0.043 (0.016) | -0.116 (0.015) | 0.127 (0.013)  | 0.023 (0.013)  |
| cLOR <sub>13</sub> | 0.50  | 0.118 (0.025)                     | 0.021 (0.024)  | -0.024 (0.023) | 0.060 (0.011)  | 0.013 (0.015)  |
| cLOR <sub>14</sub> | 0.00  | -0.012 (0.007)                    | 0.005 (0.007)  | -0.026 (0.007) | -0.004 (0.006) | 0.002 (0.006)  |
| cLOR <sub>15</sub> | -0.50 | -0.115 (0.009)                    | -0.037 (0.008) | -0.123 (0.009) | -0.050 (0.008) | -0.028 (0.008) |
| cLOR <sub>23</sub> | -0.50 | -0.128 (0.030)                    | 0.052 (0.028)  | 0.090 (0.027)  | -0.079 (0.016) | -0.013 (0.019) |
| cLOR <sub>24</sub> | -1.00 | -0.229 (0.020)                    | 0.039 (0.018)  | 0.093 (0.017)  | -0.140 (0.014) | -0.026 (0.014) |
| cLOR <sub>25</sub> | -1.50 | -0.406 (0.023)                    | -0.031 (0.019) | -0.013 (0.019) | -0.210 (0.015) | -0.070 (0.015) |
| cLOR <sub>34</sub> | -0.50 | -0.157 (0.026)                    | -0.024 (0.025) | -0.002 (0.024) | -0.071 (0.012) | -0.017 (0.017) |
| cLOR <sub>35</sub> | -1.00 | -0.345 (0.027)                    | -0.094 (0.025) | -0.108 (0.024) | -0.137 (0.013) | -0.058 (0.017) |
| cLOR <sub>45</sub> | -0.50 | -0.114 (0.010)                    | -0.049 (0.009) | -0.098 (0.010) | -0.051 (0.009) | -0.033 (0.009) |
| $\mu_1$            | -2.00 | -0.004 (0.004)                    | -0.005 (0.004) | -0.038 (0.004) | -0.003 (0.004) | -0.008 (0.004) |
| $\mu_2$            | -3.00 | -0.181 (0.019)                    | 0.050 (0.017)  | 0.112 (0.016)  | -0.124 (0.012) | -0.025 (0.013) |
| $\mu_3$            | -2.50 | -0.122 (0.025)                    | -0.025 (0.024) | -0.007 (0.023) | -0.065 (0.011) | -0.022 (0.015) |
| $\mu_4$            | -2.00 | -0.002 (0.006)                    | -0.018 (0.006) | -0.020 (0.006) | -0.006 (0.006) | -0.016 (0.006) |
| $\mu_5$            | -1.50 | 0.088 (0.008)                     | 0.013 (0.008)  | 0.060 (0.008)  | 0.035 (0.007)  | 0.008 (0.007)  |
| $p_1$              | 0.12  | 0.002 (0.000)                     | 0.002 (0.000)  | 0.024 (0.001)  | 0.002 (0.000)  | 0.001 (0.000)  |
| $p_2$              | 0.07  | 0.015 (0.001)                     | 0.012 (0.001)  | 0.023 (0.001)  | 0.012 (0.001)  | 0.005 (0.001)  |
| $p_3$              | 0.10  | 0.042 (0.002)                     | 0.010 (0.002)  | 0.010 (0.002)  | 0.036 (0.001)  | 0.000 (0.001)  |
| $p_4$              | 0.12  | 0.010 (0.001)                     | 0.006 (0.001)  | 0.018 (0.001)  | 0.009 (0.001)  | 0.006 (0.001)  |
| $p_5$              | 0.19  | 0.030 (0.002)                     | 0.014 (0.001)  | 0.032 (0.002)  | 0.019 (0.001)  | 0.012 (0.001)  |
| $\delta_1$         | 0.40  | 0.033 (0.004)                     | 0.033 (0.004)  | 0.607 (0.007)  | 0.034 (0.004)  | 0.031 (0.004)  |
| $\delta_2$         | 1.00  | 0.375 (0.020)                     | 0.022 (0.015)  | 0.173 (0.016)  | 0.274 (0.017)  | -0.013 (0.013) |
| $\delta_3$         | 1.00  | 0.905 (0.022)                     | -0.163 (0.020) | -0.164 (0.016) | 0.565 (0.021)  | -0.255 (0.015) |
| $\delta_4$         | 0.30  | 0.200 (0.009)                     | 0.182 (0.007)  | 0.434 (0.010)  | 0.168 (0.008)  | 0.167 (0.007)  |
| $\delta_5$         | 0.30  | 0.319 (0.010)                     | 0.233 (0.008)  | 0.475 (0.012)  | 0.222 (0.008)  | 0.189 (0.007)  |
| $\rho$             | 0.50  | 0.081 (0.006)                     | -0.027 (0.006) | 0.089 (0.006)  | 0.059 (0.006)  | -0.007 (0.006) |

TABLE C7

Simulation results comparing data generated under the UM-UV scenario with MCAR missingness of treatment arms. The estimated bias and the Monte Carlo standard error of the posterior median are rounded to 3 decimal places for the five methods (NB, CPV, FBV, CPM, and DCP).

| Parameter          | Truth | Bias (Monte Carlo standard error) |                |                |                |                |
|--------------------|-------|-----------------------------------|----------------|----------------|----------------|----------------|
|                    |       | NB                                | CPV            | FBV            | CPM            | DCP            |
| cLOR <sub>12</sub> | 1.00  | 0.068 (0.016)                     | 0.005 (0.015)  | -0.041 (0.015) | -0.115 (0.011) | -0.075 (0.012) |
| cLOR <sub>13</sub> | 0.50  | 0.108 (0.026)                     | 0.054 (0.024)  | 0.009 (0.024)  | -0.281 (0.010) | -0.126 (0.017) |
| cLOR <sub>14</sub> | 0.00  | 0.029 (0.007)                     | 0.029 (0.007)  | 0.006 (0.007)  | 0.110 (0.007)  | 0.110 (0.007)  |
| cLOR <sub>15</sub> | -0.50 | 0.000 (0.007)                     | -0.002 (0.007) | -0.029 (0.008) | 0.101 (0.007)  | 0.093 (0.007)  |
| cLOR <sub>23</sub> | -0.50 | 0.026 (0.031)                     | 0.046 (0.029)  | 0.048 (0.028)  | -0.160 (0.015) | -0.056 (0.020) |
| cLOR <sub>24</sub> | -1.00 | -0.041 (0.018)                    | 0.022 (0.017)  | 0.046 (0.016)  | 0.230 (0.012)  | 0.187 (0.013)  |
| cLOR <sub>25</sub> | -1.50 | -0.075 (0.019)                    | -0.012 (0.017) | 0.008 (0.017)  | 0.224 (0.013)  | 0.172 (0.013)  |
| cLOR <sub>34</sub> | -0.50 | -0.078 (0.027)                    | -0.027 (0.025) | -0.004 (0.025) | 0.394 (0.012)  | 0.241 (0.018)  |
| cLOR <sub>35</sub> | -1.00 | -0.111 (0.027)                    | -0.060 (0.025) | -0.041 (0.025) | 0.387 (0.012)  | 0.227 (0.017)  |
| cLOR <sub>45</sub> | -0.50 | -0.031 (0.010)                    | -0.032 (0.009) | -0.036 (0.009) | -0.007 (0.009) | -0.016 (0.009) |
| $\mu_1$            | -2.00 | -0.003 (0.004)                    | -0.005 (0.004) | -0.039 (0.004) | 0.031 (0.004)  | 0.024 (0.004)  |
| $\mu_2$            | -3.00 | -0.073 (0.017)                    | -0.011 (0.015) | 0.006 (0.015)  | 0.149 (0.011)  | 0.100 (0.012)  |
| $\mu_3$            | -2.50 | -0.114 (0.026)                    | -0.060 (0.025) | -0.044 (0.024) | 0.318 (0.010)  | 0.152 (0.017)  |
| $\mu_4$            | -2.00 | -0.033 (0.006)                    | -0.035 (0.006) | -0.043 (0.006) | -0.076 (0.006) | -0.084 (0.006) |
| $\mu_5$            | -1.50 | -0.004 (0.007)                    | -0.004 (0.007) | -0.008 (0.007) | -0.067 (0.007) | -0.066 (0.007) |
| $p_1$              | 0.12  | 0.002 (0.000)                     | 0.002 (0.000)  | 0.026 (0.001)  | 0.006 (0.000)  | 0.005 (0.000)  |
| $p_2$              | 0.07  | 0.019 (0.001)                     | 0.005 (0.001)  | 0.011 (0.001)  | 0.029 (0.001)  | 0.008 (0.001)  |
| $p_3$              | 0.10  | 0.038 (0.002)                     | 0.004 (0.002)  | 0.005 (0.002)  | 0.066 (0.002)  | 0.012 (0.002)  |
| $p_4$              | 0.12  | 0.005 (0.001)                     | 0.004 (0.001)  | 0.014 (0.001)  | 0.001 (0.001)  | -0.001 (0.001) |
| $p_5$              | 0.19  | 0.014 (0.001)                     | 0.010 (0.001)  | 0.022 (0.001)  | 0.006 (0.001)  | 0.001 (0.001)  |
| $\delta_1$         | 0.40  | 0.033 (0.004)                     | 0.033 (0.004)  | 0.644 (0.006)  | 0.033 (0.004)  | 0.031 (0.004)  |
| $\delta_2$         | 1.00  | 0.337 (0.020)                     | -0.049 (0.014) | 0.062 (0.015)  | 0.258 (0.018)  | -0.093 (0.013) |
| $\delta_3$         | 1.00  | 0.736 (0.022)                     | -0.267 (0.018) | -0.264 (0.015) | 0.478 (0.022)  | -0.318 (0.014) |
| $\delta_4$         | 0.30  | 0.153 (0.007)                     | 0.155 (0.007)  | 0.413 (0.010)  | 0.145 (0.007)  | 0.151 (0.006)  |
| $\delta_5$         | 0.30  | 0.263 (0.010)                     | 0.211 (0.009)  | 0.480 (0.013)  | 0.235 (0.009)  | 0.197 (0.008)  |
| $\rho$             | 0.50  | 0.005 (0.007)                     | -0.017 (0.007) | 0.086 (0.007)  | 0.010 (0.007)  | -0.016 (0.007) |

TABLE C8

*Simulation results comparing data generated under the UM-UV scenario with MAR missingness of treatment arms. The estimated bias and the Monte Carlo standard error of the posterior median are rounded to 3 decimal places for the five methods (NB, CPV, FBV, CPM, and DCP).*

| Parameter          | Truth | Bias (Monte Carlo standard error) |                |                |                |                |
|--------------------|-------|-----------------------------------|----------------|----------------|----------------|----------------|
|                    |       | NB                                | CPV            | FBV            | CPM            | DCP            |
| cLOR <sub>12</sub> | 1.00  | 0.190 (0.019)                     | -0.083 (0.016) | -0.187 (0.015) | -0.159 (0.011) | -0.202 (0.011) |
| cLOR <sub>13</sub> | 0.50  | 0.119 (0.025)                     | 0.013 (0.023)  | -0.037 (0.022) | -0.282 (0.010) | -0.157 (0.016) |
| cLOR <sub>14</sub> | 0.00  | -0.012 (0.007)                    | 0.008 (0.007)  | -0.018 (0.007) | 0.095 (0.007)  | 0.105 (0.007)  |
| cLOR <sub>15</sub> | -0.50 | -0.115 (0.009)                    | -0.030 (0.008) | -0.105 (0.009) | 0.104 (0.008)  | 0.127 (0.007)  |
| cLOR <sub>23</sub> | -0.50 | -0.129 (0.030)                    | 0.086 (0.027)  | 0.153 (0.026)  | -0.125 (0.014) | 0.039 (0.018)  |
| cLOR <sub>24</sub> | -1.00 | -0.229 (0.020)                    | 0.084 (0.017)  | 0.176 (0.016)  | 0.259 (0.012)  | 0.311 (0.013)  |
| cLOR <sub>25</sub> | -1.50 | -0.407 (0.023)                    | 0.018 (0.018)  | 0.084 (0.018)  | 0.255 (0.013)  | 0.328 (0.013)  |
| cLOR <sub>34</sub> | -0.50 | -0.157 (0.026)                    | -0.012 (0.025) | 0.020 (0.024)  | 0.376 (0.011)  | 0.265 (0.017)  |
| cLOR <sub>35</sub> | -1.00 | -0.346 (0.027)                    | -0.079 (0.025) | -0.073 (0.024) | 0.370 (0.012)  | 0.281 (0.017)  |
| cLOR <sub>45</sub> | -0.50 | -0.115 (0.010)                    | -0.046 (0.010) | -0.087 (0.010) | 0.003 (0.009)  | 0.019 (0.009)  |
| $\mu_1$            | -2.00 | -0.004 (0.004)                    | -0.005 (0.004) | -0.039 (0.004) | 0.032 (0.004)  | 0.024 (0.004)  |
| $\mu_2$            | -3.00 | -0.181 (0.019)                    | 0.090 (0.016)  | 0.181 (0.015)  | 0.203 (0.011)  | 0.236 (0.011)  |
| $\mu_3$            | -2.50 | -0.122 (0.025)                    | -0.017 (0.024) | 0.006 (0.023)  | 0.320 (0.010)  | 0.183 (0.016)  |
| $\mu_4$            | -2.00 | -0.002 (0.006)                    | -0.021 (0.006) | -0.029 (0.006) | -0.066 (0.006) | -0.082 (0.006) |
| $\mu_5$            | -1.50 | 0.089 (0.009)                     | 0.008 (0.008)  | 0.040 (0.008)  | -0.080 (0.007) | -0.110 (0.007) |
| $p_1$              | 0.12  | 0.002 (0.000)                     | 0.002 (0.000)  | 0.026 (0.001)  | 0.006 (0.000)  | 0.005 (0.000)  |
| $p_2$              | 0.07  | 0.015 (0.001)                     | 0.011 (0.001)  | 0.021 (0.001)  | 0.028 (0.001)  | 0.015 (0.001)  |
| $p_3$              | 0.10  | 0.042 (0.002)                     | 0.008 (0.002)  | 0.008 (0.002)  | 0.070 (0.002)  | 0.015 (0.002)  |
| $p_4$              | 0.12  | 0.010 (0.001)                     | 0.006 (0.001)  | 0.016 (0.001)  | 0.002 (0.001)  | -0.001 (0.001) |
| $p_5$              | 0.19  | 0.030 (0.002)                     | 0.013 (0.001)  | 0.029 (0.002)  | 0.002 (0.001)  | -0.006 (0.001) |
| $\delta_1$         | 0.40  | 0.033 (0.004)                     | 0.030 (0.004)  | 0.643 (0.006)  | 0.029 (0.004)  | 0.030 (0.004)  |
| $\delta_2$         | 1.00  | 0.376 (0.020)                     | -0.046 (0.013) | 0.039 (0.014)  | 0.180 (0.016)  | -0.124 (0.012) |
| $\delta_3$         | 1.00  | 0.905 (0.022)                     | -0.217 (0.019) | -0.250 (0.014) | 0.549 (0.022)  | -0.305 (0.014) |
| $\delta_4$         | 0.30  | 0.200 (0.009)                     | 0.170 (0.007)  | 0.414 (0.010)  | 0.146 (0.007)  | 0.145 (0.007)  |
| $\delta_5$         | 0.30  | 0.320 (0.010)                     | 0.231 (0.009)  | 0.486 (0.014)  | 0.197 (0.008)  | 0.169 (0.007)  |
| $\rho$             | 0.50  | 0.082 (0.006)                     | -0.044 (0.006) | 0.043 (0.006)  | -0.092 (0.007) | -0.158 (0.006) |

**C.2. Mean squared error (MSE).** Tables C9–C16 provide the estimated mean squared error and the Monte Carlo standard error of the posterior median for the five methods (NB, CPV, FBV, CPM, and DCP) using different data-generating mechanisms (EM-EV, UM-EV, EM-UV, and UM-UV) and missingness structures (MCAR and MAR).

TABLE C9

*Simulation results comparing data generated under the EM-EV scenario with MCAR missingness of treatment arms. The estimated mean squared error and the Monte Carlo standard error of the posterior median are rounded to 3 decimal places for the five methods (NB, CPV, FBV, CPM, and DCP).*

| Parameter          | MSE (Monte Carlo standard error) |               |               |               |               |
|--------------------|----------------------------------|---------------|---------------|---------------|---------------|
|                    | NB                               | CPV           | FBV           | CPM           | DCP           |
| cLOR <sub>12</sub> | 0.275 (0.000)                    | 0.252 (0.000) | 0.257 (0.000) | 0.185 (0.000) | 0.184 (0.000) |
| cLOR <sub>13</sub> | 0.673 (0.001)                    | 0.653 (0.001) | 0.638 (0.001) | 0.273 (0.000) | 0.299 (0.001) |
| cLOR <sub>14</sub> | 0.047 (0.000)                    | 0.044 (0.000) | 0.044 (0.000) | 0.022 (0.000) | 0.025 (0.000) |
| cLOR <sub>15</sub> | 0.055 (0.000)                    | 0.050 (0.000) | 0.050 (0.000) | 0.027 (0.000) | 0.029 (0.000) |
| cLOR <sub>23</sub> | 0.990 (0.002)                    | 0.945 (0.002) | 0.931 (0.002) | 0.465 (0.001) | 0.487 (0.001) |
| cLOR <sub>24</sub> | 0.324 (0.001)                    | 0.296 (0.000) | 0.301 (0.000) | 0.198 (0.000) | 0.202 (0.000) |
| cLOR <sub>25</sub> | 0.354 (0.001)                    | 0.315 (0.000) | 0.321 (0.000) | 0.210 (0.000) | 0.215 (0.000) |
| cLOR <sub>34</sub> | 0.727 (0.001)                    | 0.702 (0.001) | 0.684 (0.001) | 0.285 (0.001) | 0.316 (0.001) |
| cLOR <sub>35</sub> | 0.738 (0.001)                    | 0.703 (0.001) | 0.687 (0.001) | 0.283 (0.000) | 0.314 (0.001) |
| cLOR <sub>45</sub> | 0.093 (0.000)                    | 0.080 (0.000) | 0.080 (0.000) | 0.038 (0.000) | 0.043 (0.000) |
| $\mu_1$            | 0.016 (0.000)                    | 0.015 (0.000) | 0.015 (0.000) | 0.007 (0.000) | 0.008 (0.000) |
| $\mu_2$            | 0.289 (0.000)                    | 0.265 (0.000) | 0.270 (0.000) | 0.187 (0.000) | 0.187 (0.000) |
| $\mu_3$            | 0.697 (0.001)                    | 0.675 (0.001) | 0.658 (0.001) | 0.271 (0.000) | 0.299 (0.001) |
| $\mu_4$            | 0.042 (0.000)                    | 0.039 (0.000) | 0.039 (0.000) | 0.017 (0.000) | 0.020 (0.000) |
| $\mu_5$            | 0.047 (0.000)                    | 0.042 (0.000) | 0.042 (0.000) | 0.021 (0.000) | 0.024 (0.000) |
| $p_1$              | 0.000 (0.000)                    | 0.000 (0.000) | 0.000 (0.000) | 0.000 (0.000) | 0.000 (0.000) |
| $p_2$              | 0.002 (0.000)                    | 0.001 (0.000) | 0.001 (0.000) | 0.001 (0.000) | 0.001 (0.000) |
| $p_3$              | 0.006 (0.000)                    | 0.005 (0.000) | 0.006 (0.000) | 0.004 (0.000) | 0.002 (0.000) |
| $p_4$              | 0.000 (0.000)                    | 0.000 (0.000) | 0.000 (0.000) | 0.000 (0.000) | 0.000 (0.000) |
| $p_5$              | 0.001 (0.000)                    | 0.001 (0.000) | 0.001 (0.000) | 0.001 (0.000) | 0.001 (0.000) |
| $\delta_1$         | 0.019 (0.000)                    | 0.015 (0.000) | 0.013 (0.000) | 0.018 (0.000) | 0.015 (0.000) |
| $\delta_2$         | 0.513 (0.001)                    | 0.269 (0.001) | 0.294 (0.001) | 0.426 (0.001) | 0.215 (0.000) |
| $\delta_3$         | 1.035 (0.001)                    | 0.505 (0.001) | 0.536 (0.001) | 0.691 (0.001) | 0.309 (0.001) |
| $\delta_4$         | 0.078 (0.000)                    | 0.023 (0.000) | 0.018 (0.000) | 0.050 (0.000) | 0.022 (0.000) |
| $\delta_5$         | 0.165 (0.000)                    | 0.031 (0.000) | 0.027 (0.000) | 0.085 (0.000) | 0.025 (0.000) |
| $\rho$             | 0.044 (0.000)                    | 0.044 (0.000) | 0.045 (0.000) | 0.046 (0.000) | 0.045 (0.000) |

TABLE C10

Simulation results comparing data generated under the EM-EV scenario with MAR missingness of treatment arms. The estimated mean squared error and the Monte Carlo standard error of the posterior median are rounded to 3 decimal places for the five methods (NB, CPV, FBV, CPM, and DCP).

| Parameter          | MSE (Monte Carlo standard error) |               |               |               |               |
|--------------------|----------------------------------|---------------|---------------|---------------|---------------|
|                    | NB                               | CPV           | FBV           | CPM           | DCP           |
| cLOR <sub>12</sub> | 0.389 (0.001)                    | 0.278 (0.000) | 0.301 (0.000) | 0.223 (0.000) | 0.205 (0.000) |
| cLOR <sub>13</sub> | 0.620 (0.001)                    | 0.595 (0.001) | 0.567 (0.001) | 0.258 (0.000) | 0.272 (0.000) |
| cLOR <sub>14</sub> | 0.046 (0.000)                    | 0.046 (0.000) | 0.046 (0.000) | 0.022 (0.000) | 0.026 (0.000) |
| cLOR <sub>15</sub> | 0.093 (0.000)                    | 0.061 (0.000) | 0.060 (0.000) | 0.029 (0.000) | 0.033 (0.000) |
| cLOR <sub>23</sub> | 0.917 (0.001)                    | 0.824 (0.001) | 0.814 (0.001) | 0.443 (0.001) | 0.448 (0.001) |
| cLOR <sub>24</sub> | 0.468 (0.001)                    | 0.322 (0.000) | 0.342 (0.001) | 0.234 (0.000) | 0.218 (0.000) |
| cLOR <sub>25</sub> | 0.676 (0.001)                    | 0.352 (0.001) | 0.375 (0.001) | 0.255 (0.000) | 0.226 (0.000) |
| cLOR <sub>34</sub> | 0.694 (0.001)                    | 0.648 (0.001) | 0.620 (0.001) | 0.277 (0.000) | 0.294 (0.000) |
| cLOR <sub>35</sub> | 0.823 (0.001)                    | 0.646 (0.001) | 0.617 (0.001) | 0.277 (0.000) | 0.286 (0.000) |
| cLOR <sub>45</sub> | 0.113 (0.000)                    | 0.083 (0.000) | 0.083 (0.000) | 0.039 (0.000) | 0.045 (0.000) |
| $\mu_1$            | 0.016 (0.000)                    | 0.015 (0.000) | 0.015 (0.000) | 0.007 (0.000) | 0.008 (0.000) |
| $\mu_2$            | 0.403 (0.001)                    | 0.294 (0.000) | 0.315 (0.000) | 0.225 (0.000) | 0.208 (0.000) |
| $\mu_3$            | 0.637 (0.001)                    | 0.608 (0.001) | 0.580 (0.001) | 0.255 (0.000) | 0.271 (0.000) |
| $\mu_4$            | 0.040 (0.000)                    | 0.040 (0.000) | 0.040 (0.000) | 0.017 (0.000) | 0.022 (0.000) |
| $\mu_5$            | 0.080 (0.000)                    | 0.053 (0.000) | 0.052 (0.000) | 0.022 (0.000) | 0.028 (0.000) |
| $p_1$              | 0.000 (0.000)                    | 0.000 (0.000) | 0.000 (0.000) | 0.000 (0.000) | 0.000 (0.000) |
| $p_2$              | 0.001 (0.000)                    | 0.001 (0.000) | 0.001 (0.000) | 0.001 (0.000) | 0.001 (0.000) |
| $p_3$              | 0.006 (0.000)                    | 0.005 (0.000) | 0.005 (0.000) | 0.005 (0.000) | 0.002 (0.000) |
| $p_4$              | 0.001 (0.000)                    | 0.000 (0.000) | 0.000 (0.000) | 0.000 (0.000) | 0.000 (0.000) |
| $p_5$              | 0.003 (0.000)                    | 0.001 (0.000) | 0.001 (0.000) | 0.001 (0.000) | 0.001 (0.000) |
| $\delta_1$         | 0.018 (0.000)                    | 0.015 (0.000) | 0.013 (0.000) | 0.017 (0.000) | 0.015 (0.000) |
| $\delta_2$         | 0.528 (0.001)                    | 0.238 (0.000) | 0.269 (0.000) | 0.375 (0.001) | 0.196 (0.000) |
| $\delta_3$         | 1.302 (0.002)                    | 0.516 (0.001) | 0.542 (0.001) | 0.835 (0.001) | 0.298 (0.001) |
| $\delta_4$         | 0.116 (0.000)                    | 0.024 (0.000) | 0.019 (0.000) | 0.066 (0.000) | 0.023 (0.000) |
| $\delta_5$         | 0.207 (0.000)                    | 0.030 (0.000) | 0.027 (0.000) | 0.080 (0.000) | 0.023 (0.000) |
| $\rho$             | 0.041 (0.000)                    | 0.035 (0.000) | 0.035 (0.000) | 0.041 (0.000) | 0.037 (0.000) |

TABLE C11

*Simulation results comparing data generated under the UM-EV scenario with MCAR missingness of treatment arms. The estimated mean squared error and the Monte Carlo standard error of the posterior median are rounded to 3 decimal places for the five methods (NB, CPV, FBV, CPM, and DCP).*

| Parameter          | MSE (Monte Carlo standard error) |               |               |               |               |
|--------------------|----------------------------------|---------------|---------------|---------------|---------------|
|                    | NB                               | CPV           | FBV           | CPM           | DCP           |
| cLOR <sub>12</sub> | 0.274 (0.000)                    | 0.247 (0.000) | 0.250 (0.000) | 0.176 (0.000) | 0.168 (0.000) |
| cLOR <sub>13</sub> | 0.673 (0.001)                    | 0.644 (0.001) | 0.631 (0.001) | 0.299 (0.000) | 0.293 (0.000) |
| cLOR <sub>14</sub> | 0.047 (0.000)                    | 0.044 (0.000) | 0.044 (0.000) | 0.074 (0.000) | 0.061 (0.000) |
| cLOR <sub>15</sub> | 0.055 (0.000)                    | 0.050 (0.000) | 0.050 (0.000) | 0.069 (0.000) | 0.058 (0.000) |
| cLOR <sub>23</sub> | 0.991 (0.002)                    | 0.928 (0.002) | 0.907 (0.001) | 0.448 (0.001) | 0.458 (0.001) |
| cLOR <sub>24</sub> | 0.324 (0.001)                    | 0.291 (0.000) | 0.293 (0.000) | 0.271 (0.000) | 0.237 (0.000) |
| cLOR <sub>25</sub> | 0.353 (0.001)                    | 0.309 (0.000) | 0.312 (0.000) | 0.267 (0.000) | 0.237 (0.000) |
| cLOR <sub>34</sub> | 0.727 (0.001)                    | 0.692 (0.001) | 0.675 (0.001) | 0.428 (0.001) | 0.379 (0.001) |
| cLOR <sub>35</sub> | 0.737 (0.001)                    | 0.694 (0.001) | 0.679 (0.001) | 0.409 (0.001) | 0.361 (0.001) |
| cLOR <sub>45</sub> | 0.093 (0.000)                    | 0.081 (0.000) | 0.081 (0.000) | 0.071 (0.000) | 0.076 (0.000) |
| $\mu_1$            | 0.016 (0.000)                    | 0.015 (0.000) | 0.015 (0.000) | 0.014 (0.000) | 0.015 (0.000) |
| $\mu_2$            | 0.289 (0.000)                    | 0.260 (0.000) | 0.262 (0.000) | 0.182 (0.000) | 0.174 (0.000) |
| $\mu_3$            | 0.697 (0.001)                    | 0.666 (0.001) | 0.650 (0.001) | 0.298 (0.000) | 0.299 (0.000) |
| $\mu_4$            | 0.042 (0.000)                    | 0.039 (0.000) | 0.039 (0.000) | 0.066 (0.000) | 0.054 (0.000) |
| $\mu_5$            | 0.047 (0.000)                    | 0.042 (0.000) | 0.042 (0.000) | 0.059 (0.000) | 0.048 (0.000) |
| $p_1$              | 0.000 (0.000)                    | 0.000 (0.000) | 0.000 (0.000) | 0.000 (0.000) | 0.000 (0.000) |
| $p_2$              | 0.002 (0.000)                    | 0.001 (0.000) | 0.001 (0.000) | 0.002 (0.000) | 0.001 (0.000) |
| $p_3$              | 0.006 (0.000)                    | 0.005 (0.000) | 0.006 (0.000) | 0.008 (0.000) | 0.004 (0.000) |
| $p_4$              | 0.000 (0.000)                    | 0.000 (0.000) | 0.000 (0.000) | 0.000 (0.000) | 0.000 (0.000) |
| $p_5$              | 0.001 (0.000)                    | 0.001 (0.000) | 0.001 (0.000) | 0.001 (0.000) | 0.001 (0.000) |
| $\delta_1$         | 0.019 (0.000)                    | 0.017 (0.000) | 0.016 (0.000) | 0.019 (0.000) | 0.017 (0.000) |
| $\delta_2$         | 0.513 (0.001)                    | 0.234 (0.000) | 0.240 (0.000) | 0.421 (0.001) | 0.191 (0.000) |
| $\delta_3$         | 1.034 (0.001)                    | 0.441 (0.001) | 0.450 (0.001) | 0.756 (0.001) | 0.278 (0.001) |
| $\delta_4$         | 0.078 (0.000)                    | 0.023 (0.000) | 0.019 (0.000) | 0.077 (0.000) | 0.023 (0.000) |
| $\delta_5$         | 0.164 (0.000)                    | 0.033 (0.000) | 0.030 (0.000) | 0.127 (0.000) | 0.030 (0.000) |
| $\rho$             | 0.044 (0.000)                    | 0.044 (0.000) | 0.045 (0.000) | 0.046 (0.000) | 0.046 (0.000) |



TABLE C12

Simulation results comparing data generated under the UM-EV scenario with MAR missingness of treatment arms. The estimated mean squared error and the Monte Carlo standard error of the posterior median are rounded to 3 decimal places for the five methods (NB, CPV, FBV, CPM, and DCP).

| Parameter          | MSE (Monte Carlo standard error) |               |               |               |               |
|--------------------|----------------------------------|---------------|---------------|---------------|---------------|
|                    | NB                               | CPV           | FBV           | CPM           | DCP           |
| cLOR <sub>12</sub> | 0.388 (0.001)                    | 0.271 (0.000) | 0.289 (0.000) | 0.200 (0.000) | 0.201 (0.000) |
| cLOR <sub>13</sub> | 0.619 (0.001)                    | 0.592 (0.001) | 0.567 (0.001) | 0.300 (0.000) | 0.288 (0.000) |
| cLOR <sub>14</sub> | 0.046 (0.000)                    | 0.046 (0.000) | 0.046 (0.000) | 0.071 (0.000) | 0.066 (0.000) |
| cLOR <sub>15</sub> | 0.093 (0.000)                    | 0.061 (0.000) | 0.060 (0.000) | 0.079 (0.000) | 0.086 (0.000) |
| cLOR <sub>23</sub> | 0.916 (0.001)                    | 0.815 (0.001) | 0.808 (0.001) | 0.409 (0.001) | 0.414 (0.001) |
| cLOR <sub>24</sub> | 0.466 (0.001)                    | 0.316 (0.000) | 0.333 (0.001) | 0.319 (0.000) | 0.314 (0.000) |
| cLOR <sub>25</sub> | 0.674 (0.001)                    | 0.349 (0.001) | 0.370 (0.001) | 0.336 (0.000) | 0.355 (0.000) |
| cLOR <sub>34</sub> | 0.694 (0.001)                    | 0.645 (0.001) | 0.621 (0.001) | 0.432 (0.001) | 0.390 (0.001) |
| cLOR <sub>35</sub> | 0.822 (0.001)                    | 0.644 (0.001) | 0.619 (0.001) | 0.422 (0.001) | 0.411 (0.001) |
| cLOR <sub>45</sub> | 0.114 (0.000)                    | 0.083 (0.000) | 0.083 (0.000) | 0.065 (0.000) | 0.072 (0.000) |
| $\mu_1$            | 0.016 (0.000)                    | 0.015 (0.000) | 0.015 (0.000) | 0.015 (0.000) | 0.015 (0.000) |
| $\mu_2$            | 0.403 (0.001)                    | 0.287 (0.000) | 0.302 (0.000) | 0.213 (0.000) | 0.218 (0.000) |
| $\mu_3$            | 0.636 (0.001)                    | 0.605 (0.001) | 0.579 (0.001) | 0.300 (0.000) | 0.292 (0.000) |
| $\mu_4$            | 0.040 (0.000)                    | 0.040 (0.000) | 0.040 (0.000) | 0.065 (0.000) | 0.057 (0.000) |
| $\mu_5$            | 0.080 (0.000)                    | 0.053 (0.000) | 0.052 (0.000) | 0.069 (0.000) | 0.073 (0.000) |
| $p_1$              | 0.000 (0.000)                    | 0.000 (0.000) | 0.000 (0.000) | 0.000 (0.000) | 0.000 (0.000) |
| $p_2$              | 0.001 (0.000)                    | 0.001 (0.000) | 0.001 (0.000) | 0.002 (0.000) | 0.001 (0.000) |
| $p_3$              | 0.006 (0.000)                    | 0.005 (0.000) | 0.005 (0.000) | 0.008 (0.000) | 0.004 (0.000) |
| $p_4$              | 0.001 (0.000)                    | 0.000 (0.000) | 0.000 (0.000) | 0.000 (0.000) | 0.000 (0.000) |
| $p_5$              | 0.003 (0.000)                    | 0.001 (0.000) | 0.001 (0.000) | 0.001 (0.000) | 0.001 (0.000) |
| $\delta_1$         | 0.018 (0.000)                    | 0.017 (0.000) | 0.016 (0.000) | 0.018 (0.000) | 0.018 (0.000) |
| $\delta_2$         | 0.528 (0.001)                    | 0.211 (0.000) | 0.226 (0.000) | 0.313 (0.000) | 0.164 (0.000) |
| $\delta_3$         | 1.301 (0.002)                    | 0.472 (0.001) | 0.464 (0.001) | 0.782 (0.001) | 0.275 (0.001) |
| $\delta_4$         | 0.115 (0.000)                    | 0.024 (0.000) | 0.020 (0.000) | 0.076 (0.000) | 0.023 (0.000) |
| $\delta_5$         | 0.208 (0.000)                    | 0.032 (0.000) | 0.030 (0.000) | 0.089 (0.000) | 0.027 (0.000) |
| $\rho$             | 0.041 (0.000)                    | 0.035 (0.000) | 0.036 (0.000) | 0.064 (0.000) | 0.076 (0.000) |

TABLE C13

*Simulation results comparing data generated under the EM-UV scenario with MCAR missingness of treatment arms. The estimated mean squared error and the Monte Carlo standard error of the posterior median are rounded to 3 decimal places for the five methods (NB, CPV, FBV, CPM, and DCP).*

| Parameter          | MSE (Monte Carlo standard error) |               |               |               |               |
|--------------------|----------------------------------|---------------|---------------|---------------|---------------|
|                    | NB                               | CPV           | FBV           | CPM           | DCP           |
| cLOR <sub>12</sub> | 0.274 (0.000)                    | 0.236 (0.000) | 0.229 (0.000) | 0.147 (0.000) | 0.156 (0.000) |
| cLOR <sub>13</sub> | 0.670 (0.001)                    | 0.599 (0.001) | 0.567 (0.001) | 0.120 (0.000) | 0.265 (0.000) |
| cLOR <sub>14</sub> | 0.047 (0.000)                    | 0.047 (0.000) | 0.049 (0.000) | 0.042 (0.000) | 0.042 (0.000) |
| cLOR <sub>15</sub> | 0.055 (0.000)                    | 0.053 (0.000) | 0.058 (0.000) | 0.052 (0.000) | 0.049 (0.000) |
| cLOR <sub>23</sub> | 0.988 (0.002)                    | 0.868 (0.001) | 0.825 (0.001) | 0.250 (0.000) | 0.405 (0.001) |
| cLOR <sub>24</sub> | 0.323 (0.001)                    | 0.285 (0.000) | 0.281 (0.000) | 0.172 (0.000) | 0.185 (0.000) |
| cLOR <sub>25</sub> | 0.352 (0.001)                    | 0.304 (0.000) | 0.295 (0.000) | 0.194 (0.000) | 0.203 (0.000) |
| cLOR <sub>34</sub> | 0.724 (0.001)                    | 0.649 (0.001) | 0.619 (0.001) | 0.146 (0.000) | 0.289 (0.000) |
| cLOR <sub>35</sub> | 0.736 (0.001)                    | 0.653 (0.001) | 0.622 (0.001) | 0.150 (0.000) | 0.290 (0.001) |
| cLOR <sub>45</sub> | 0.093 (0.000)                    | 0.089 (0.000) | 0.095 (0.000) | 0.082 (0.000) | 0.078 (0.000) |
| $\mu_1$            | 0.016 (0.000)                    | 0.016 (0.000) | 0.018 (0.000) | 0.014 (0.000) | 0.014 (0.000) |
| $\mu_2$            | 0.289 (0.000)                    | 0.248 (0.000) | 0.241 (0.000) | 0.146 (0.000) | 0.157 (0.000) |
| $\mu_3$            | 0.695 (0.001)                    | 0.622 (0.001) | 0.590 (0.001) | 0.112 (0.000) | 0.266 (0.000) |
| $\mu_4$            | 0.042 (0.000)                    | 0.042 (0.000) | 0.045 (0.000) | 0.037 (0.000) | 0.037 (0.000) |
| $\mu_5$            | 0.047 (0.000)                    | 0.045 (0.000) | 0.047 (0.000) | 0.043 (0.000) | 0.040 (0.000) |
| $p_1$              | 0.000 (0.000)                    | 0.000 (0.000) | 0.001 (0.000) | 0.000 (0.000) | 0.000 (0.000) |
| $p_2$              | 0.002 (0.000)                    | 0.001 (0.000) | 0.002 (0.000) | 0.001 (0.000) | 0.001 (0.000) |
| $p_3$              | 0.006 (0.000)                    | 0.005 (0.000) | 0.005 (0.000) | 0.003 (0.000) | 0.002 (0.000) |
| $p_4$              | 0.000 (0.000)                    | 0.000 (0.000) | 0.001 (0.000) | 0.000 (0.000) | 0.000 (0.000) |
| $p_5$              | 0.001 (0.000)                    | 0.001 (0.000) | 0.002 (0.000) | 0.001 (0.000) | 0.001 (0.000) |
| $\delta_1$         | 0.019 (0.000)                    | 0.020 (0.000) | 0.417 (0.000) | 0.019 (0.000) | 0.019 (0.000) |
| $\delta_2$         | 0.513 (0.001)                    | 0.240 (0.000) | 0.339 (0.001) | 0.404 (0.001) | 0.205 (0.000) |
| $\delta_3$         | 1.034 (0.001)                    | 0.414 (0.001) | 0.308 (0.000) | 0.633 (0.001) | 0.299 (0.000) |
| $\delta_4$         | 0.078 (0.000)                    | 0.070 (0.000) | 0.278 (0.000) | 0.064 (0.000) | 0.060 (0.000) |
| $\delta_5$         | 0.165 (0.000)                    | 0.110 (0.000) | 0.353 (0.000) | 0.121 (0.000) | 0.087 (0.000) |
| $\rho$             | 0.044 (0.000)                    | 0.046 (0.000) | 0.055 (0.000) | 0.046 (0.000) | 0.047 (0.000) |

TABLE C14

*Simulation results comparing data generated under the EM-UV scenario with MAR missingness of treatment arms. The estimated mean squared error and the Monte Carlo standard error of the posterior median are rounded to 3 decimal places for the five methods (NB, CPV, FBV, CPM, and DCP).*

| Parameter          | MSE (Monte Carlo standard error) |               |               |               |               |
|--------------------|----------------------------------|---------------|---------------|---------------|---------------|
|                    | NB                               | CPV           | FBV           | CPM           | DCP           |
| cLOR <sub>12</sub> | 0.388 (0.001)                    | 0.262 (0.000) | 0.250 (0.000) | 0.175 (0.000) | 0.168 (0.000) |
| cLOR <sub>13</sub> | 0.619 (0.001)                    | 0.559 (0.001) | 0.513 (0.001) | 0.125 (0.000) | 0.236 (0.000) |
| cLOR <sub>14</sub> | 0.046 (0.000)                    | 0.046 (0.000) | 0.049 (0.000) | 0.041 (0.000) | 0.041 (0.000) |
| cLOR <sub>15</sub> | 0.093 (0.000)                    | 0.068 (0.000) | 0.095 (0.000) | 0.066 (0.000) | 0.059 (0.000) |
| cLOR <sub>23</sub> | 0.913 (0.001)                    | 0.777 (0.001) | 0.713 (0.001) | 0.271 (0.000) | 0.374 (0.001) |
| cLOR <sub>24</sub> | 0.466 (0.001)                    | 0.314 (0.000) | 0.300 (0.000) | 0.208 (0.000) | 0.200 (0.000) |
| cLOR <sub>25</sub> | 0.674 (0.001)                    | 0.363 (0.001) | 0.349 (0.001) | 0.258 (0.000) | 0.225 (0.000) |
| cLOR <sub>34</sub> | 0.694 (0.001)                    | 0.622 (0.001) | 0.576 (0.001) | 0.157 (0.000) | 0.273 (0.000) |
| cLOR <sub>35</sub> | 0.822 (0.001)                    | 0.646 (0.001) | 0.605 (0.001) | 0.185 (0.000) | 0.282 (0.000) |
| cLOR <sub>45</sub> | 0.113 (0.000)                    | 0.092 (0.000) | 0.109 (0.000) | 0.081 (0.000) | 0.075 (0.000) |
| $\mu_1$            | 0.016 (0.000)                    | 0.016 (0.000) | 0.018 (0.000) | 0.014 (0.000) | 0.014 (0.000) |
| $\mu_2$            | 0.402 (0.001)                    | 0.278 (0.000) | 0.265 (0.000) | 0.171 (0.000) | 0.169 (0.000) |
| $\mu_3$            | 0.636 (0.001)                    | 0.573 (0.001) | 0.526 (0.001) | 0.114 (0.000) | 0.235 (0.000) |
| $\mu_4$            | 0.040 (0.000)                    | 0.040 (0.000) | 0.042 (0.000) | 0.036 (0.000) | 0.035 (0.000) |
| $\mu_5$            | 0.080 (0.000)                    | 0.058 (0.000) | 0.073 (0.000) | 0.055 (0.000) | 0.048 (0.000) |
| $p_1$              | 0.000 (0.000)                    | 0.000 (0.000) | 0.001 (0.000) | 0.000 (0.000) | 0.000 (0.000) |
| $p_2$              | 0.001 (0.000)                    | 0.001 (0.000) | 0.002 (0.000) | 0.001 (0.000) | 0.001 (0.000) |
| $p_3$              | 0.006 (0.000)                    | 0.004 (0.000) | 0.004 (0.000) | 0.003 (0.000) | 0.002 (0.000) |
| $p_4$              | 0.001 (0.000)                    | 0.001 (0.000) | 0.001 (0.000) | 0.001 (0.000) | 0.000 (0.000) |
| $p_5$              | 0.003 (0.000)                    | 0.002 (0.000) | 0.004 (0.000) | 0.002 (0.000) | 0.001 (0.000) |
| $\delta_1$         | 0.018 (0.000)                    | 0.019 (0.000) | 0.413 (0.000) | 0.018 (0.000) | 0.019 (0.000) |
| $\delta_2$         | 0.526 (0.001)                    | 0.212 (0.000) | 0.289 (0.000) | 0.354 (0.001) | 0.180 (0.000) |
| $\delta_3$         | 1.300 (0.002)                    | 0.426 (0.001) | 0.282 (0.000) | 0.781 (0.001) | 0.293 (0.000) |
| $\delta_4$         | 0.116 (0.000)                    | 0.084 (0.000) | 0.295 (0.000) | 0.091 (0.000) | 0.073 (0.000) |
| $\delta_5$         | 0.208 (0.000)                    | 0.120 (0.000) | 0.370 (0.000) | 0.118 (0.000) | 0.086 (0.000) |
| $\rho$             | 0.041 (0.000)                    | 0.034 (0.000) | 0.046 (0.000) | 0.043 (0.000) | 0.036 (0.000) |

TABLE C15

*Simulation results comparing data generated under the UM-UV scenario with MCAR missingness of treatment arms. The estimated mean squared error and the Monte Carlo standard error of the posterior median are rounded to 3 decimal places for the five methods (NB, CPV, FBV, CPM, and DCP).*

| Parameter          | MSE (Monte Carlo standard error) |               |               |               |               |
|--------------------|----------------------------------|---------------|---------------|---------------|---------------|
|                    | NB                               | CPV           | FBV           | CPM           | DCP           |
| cLOR <sub>12</sub> | 0.274 (0.000)                    | 0.227 (0.000) | 0.219 (0.000) | 0.133 (0.000) | 0.140 (0.000) |
| cLOR <sub>13</sub> | 0.671 (0.001)                    | 0.596 (0.001) | 0.564 (0.001) | 0.185 (0.000) | 0.292 (0.000) |
| cLOR <sub>14</sub> | 0.047 (0.000)                    | 0.046 (0.000) | 0.047 (0.000) | 0.057 (0.000) | 0.056 (0.000) |
| cLOR <sub>15</sub> | 0.055 (0.000)                    | 0.053 (0.000) | 0.058 (0.000) | 0.063 (0.000) | 0.059 (0.000) |
| cLOR <sub>23</sub> | 0.989 (0.002)                    | 0.859 (0.001) | 0.812 (0.001) | 0.245 (0.000) | 0.415 (0.001) |
| cLOR <sub>24</sub> | 0.324 (0.001)                    | 0.275 (0.000) | 0.265 (0.000) | 0.203 (0.000) | 0.201 (0.000) |
| cLOR <sub>25</sub> | 0.353 (0.001)                    | 0.293 (0.000) | 0.281 (0.000) | 0.215 (0.000) | 0.208 (0.000) |
| cLOR <sub>34</sub> | 0.724 (0.001)                    | 0.647 (0.001) | 0.614 (0.001) | 0.290 (0.000) | 0.366 (0.001) |
| cLOR <sub>35</sub> | 0.736 (0.001)                    | 0.646 (0.001) | 0.614 (0.001) | 0.285 (0.000) | 0.353 (0.001) |
| cLOR <sub>45</sub> | 0.093 (0.000)                    | 0.088 (0.000) | 0.091 (0.000) | 0.084 (0.000) | 0.078 (0.000) |
| $\mu_1$            | 0.016 (0.000)                    | 0.016 (0.000) | 0.018 (0.000) | 0.016 (0.000) | 0.016 (0.000) |
| $\mu_2$            | 0.289 (0.000)                    | 0.239 (0.000) | 0.228 (0.000) | 0.141 (0.000) | 0.145 (0.000) |
| $\mu_3$            | 0.695 (0.001)                    | 0.618 (0.001) | 0.587 (0.001) | 0.197 (0.000) | 0.303 (0.001) |
| $\mu_4$            | 0.042 (0.000)                    | 0.041 (0.000) | 0.043 (0.000) | 0.045 (0.000) | 0.044 (0.000) |
| $\mu_5$            | 0.047 (0.000)                    | 0.045 (0.000) | 0.047 (0.000) | 0.051 (0.000) | 0.048 (0.000) |
| $p_1$              | 0.000 (0.000)                    | 0.000 (0.000) | 0.001 (0.000) | 0.000 (0.000) | 0.000 (0.000) |
| $p_2$              | 0.002 (0.000)                    | 0.001 (0.000) | 0.001 (0.000) | 0.002 (0.000) | 0.001 (0.000) |
| $p_3$              | 0.006 (0.000)                    | 0.004 (0.000) | 0.004 (0.000) | 0.007 (0.000) | 0.003 (0.000) |
| $p_4$              | 0.000 (0.000)                    | 0.000 (0.000) | 0.001 (0.000) | 0.000 (0.000) | 0.000 (0.000) |
| $p_5$              | 0.001 (0.000)                    | 0.001 (0.000) | 0.002 (0.000) | 0.001 (0.000) | 0.001 (0.000) |
| $\delta_1$         | 0.019 (0.000)                    | 0.019 (0.000) | 0.455 (0.000) | 0.019 (0.000) | 0.019 (0.000) |
| $\delta_2$         | 0.512 (0.001)                    | 0.205 (0.000) | 0.226 (0.000) | 0.401 (0.001) | 0.175 (0.000) |
| $\delta_3$         | 1.034 (0.001)                    | 0.413 (0.001) | 0.296 (0.000) | 0.720 (0.001) | 0.301 (0.000) |
| $\delta_4$         | 0.078 (0.000)                    | 0.068 (0.000) | 0.270 (0.000) | 0.073 (0.000) | 0.064 (0.000) |
| $\delta_5$         | 0.164 (0.000)                    | 0.118 (0.000) | 0.407 (0.001) | 0.137 (0.000) | 0.101 (0.000) |
| $\rho$             | 0.044 (0.000)                    | 0.046 (0.000) | 0.051 (0.000) | 0.047 (0.000) | 0.048 (0.000) |

TABLE C16

*Simulation results comparing data generated under the UM-UV scenario with MAR missingness of treatment arms. The estimated mean squared error and the Monte Carlo standard error of the posterior median are rounded to 3 decimal places for the five methods (NB, CPV, FBV, CPM, and DCP).*

| Parameter          | MSE (Monte Carlo standard error) |               |               |               |               |
|--------------------|----------------------------------|---------------|---------------|---------------|---------------|
|                    | NB                               | CPV           | FBV           | CPM           | DCP           |
| cLOR <sub>12</sub> | 0.387 (0.001)                    | 0.248 (0.000) | 0.246 (0.000) | 0.141 (0.000) | 0.165 (0.000) |
| cLOR <sub>13</sub> | 0.620 (0.001)                    | 0.550 (0.001) | 0.506 (0.001) | 0.183 (0.000) | 0.272 (0.000) |
| cLOR <sub>14</sub> | 0.046 (0.000)                    | 0.046 (0.000) | 0.048 (0.000) | 0.053 (0.000) | 0.054 (0.000) |
| cLOR <sub>15</sub> | 0.094 (0.000)                    | 0.069 (0.000) | 0.091 (0.000) | 0.069 (0.000) | 0.071 (0.000) |
| cLOR <sub>23</sub> | 0.915 (0.001)                    | 0.754 (0.001) | 0.698 (0.001) | 0.217 (0.000) | 0.342 (0.001) |
| cLOR <sub>24</sub> | 0.466 (0.001)                    | 0.299 (0.000) | 0.292 (0.000) | 0.215 (0.000) | 0.253 (0.000) |
| cLOR <sub>25</sub> | 0.675 (0.001)                    | 0.338 (0.000) | 0.318 (0.000) | 0.232 (0.000) | 0.276 (0.000) |
| cLOR <sub>34</sub> | 0.694 (0.001)                    | 0.611 (0.001) | 0.567 (0.001) | 0.273 (0.000) | 0.354 (0.000) |
| cLOR <sub>35</sub> | 0.824 (0.001)                    | 0.633 (0.001) | 0.591 (0.001) | 0.280 (0.000) | 0.368 (0.000) |
| cLOR <sub>45</sub> | 0.114 (0.000)                    | 0.093 (0.000) | 0.110 (0.000) | 0.080 (0.000) | 0.077 (0.000) |
| $\mu_1$            | 0.016 (0.000)                    | 0.016 (0.000) | 0.018 (0.000) | 0.016 (0.000) | 0.016 (0.000) |
| $\mu_2$            | 0.402 (0.001)                    | 0.265 (0.000) | 0.259 (0.000) | 0.157 (0.000) | 0.184 (0.000) |
| $\mu_3$            | 0.636 (0.001)                    | 0.563 (0.001) | 0.516 (0.001) | 0.195 (0.000) | 0.281 (0.000) |
| $\mu_4$            | 0.040 (0.000)                    | 0.041 (0.000) | 0.042 (0.000) | 0.043 (0.000) | 0.044 (0.000) |
| $\mu_5$            | 0.080 (0.000)                    | 0.059 (0.000) | 0.071 (0.000) | 0.057 (0.000) | 0.059 (0.000) |
| $p_1$              | 0.000 (0.000)                    | 0.000 (0.000) | 0.001 (0.000) | 0.000 (0.000) | 0.000 (0.000) |
| $p_2$              | 0.001 (0.000)                    | 0.001 (0.000) | 0.002 (0.000) | 0.002 (0.000) | 0.001 (0.000) |
| $p_3$              | 0.006 (0.000)                    | 0.004 (0.000) | 0.004 (0.000) | 0.007 (0.000) | 0.002 (0.000) |
| $p_4$              | 0.001 (0.000)                    | 0.001 (0.000) | 0.001 (0.000) | 0.000 (0.000) | 0.000 (0.000) |
| $p_5$              | 0.003 (0.000)                    | 0.002 (0.000) | 0.003 (0.000) | 0.001 (0.000) | 0.001 (0.000) |
| $\delta_1$         | 0.018 (0.000)                    | 0.019 (0.000) | 0.453 (0.000) | 0.019 (0.000) | 0.020 (0.000) |
| $\delta_2$         | 0.528 (0.001)                    | 0.183 (0.000) | 0.187 (0.000) | 0.292 (0.000) | 0.155 (0.000) |
| $\delta_3$         | 1.300 (0.002)                    | 0.413 (0.001) | 0.264 (0.000) | 0.772 (0.001) | 0.290 (0.000) |
| $\delta_4$         | 0.115 (0.000)                    | 0.081 (0.000) | 0.282 (0.000) | 0.077 (0.000) | 0.064 (0.000) |
| $\delta_5$         | 0.208 (0.000)                    | 0.128 (0.000) | 0.420 (0.001) | 0.106 (0.000) | 0.084 (0.000) |
| $\rho$             | 0.041 (0.000)                    | 0.036 (0.000) | 0.042 (0.000) | 0.051 (0.000) | 0.059 (0.000) |

**C.3. Coverage.** Tables C17–C24 provide the estimated coverage of the 95% credible interval and the Monte Carlo standard error for posterior median from the five methods (NB, CPV, FBV, CPM, and DCP) using different data-generating mechanisms (EM-EV, UM-EV, EM-UV, and UM-UV) and missingness structures (MCAR and MAR).

TABLE C17

*Simulation results comparing data generated under the EM-EV scenario with MCAR missingness of treatment arms. The 95% CrI's estimated coverage probability (CP) and the Monte Carlo standard error of the posterior median are summarized for the five methods (NB, CPV, FBV, CPM, and DCP).*

| Parameter          | CP (Monte Carlo standard error) |               |               |               |               |
|--------------------|---------------------------------|---------------|---------------|---------------|---------------|
|                    | NB                              | CPV           | FBV           | CPM           | DCP           |
| cLOR <sub>12</sub> | 0.981 (0.004)                   | 0.964 (0.006) | 0.970 (0.005) | 0.970 (0.005) | 0.955 (0.007) |
| cLOR <sub>13</sub> | 1.000 (0.000)                   | 0.988 (0.003) | 0.986 (0.004) | 0.997 (0.002) | 0.983 (0.004) |
| cLOR <sub>14</sub> | 0.994 (0.002)                   | 0.965 (0.006) | 0.962 (0.006) | 0.993 (0.003) | 0.979 (0.005) |
| cLOR <sub>15</sub> | 0.999 (0.001)                   | 0.977 (0.005) | 0.978 (0.005) | 0.999 (0.001) | 0.987 (0.004) |
| cLOR <sub>23</sub> | 0.999 (0.001)                   | 0.990 (0.003) | 0.988 (0.003) | 0.996 (0.002) | 0.983 (0.004) |
| cLOR <sub>24</sub> | 0.995 (0.002)                   | 0.972 (0.005) | 0.977 (0.005) | 0.983 (0.004) | 0.964 (0.006) |
| cLOR <sub>25</sub> | 0.999 (0.001)                   | 0.978 (0.005) | 0.982 (0.004) | 0.986 (0.004) | 0.970 (0.005) |
| cLOR <sub>34</sub> | 1.000 (0.000)                   | 0.980 (0.004) | 0.979 (0.005) | 0.997 (0.002) | 0.982 (0.004) |
| cLOR <sub>35</sub> | 1.000 (0.000)                   | 0.988 (0.003) | 0.986 (0.004) | 1.000 (0.000) | 0.989 (0.003) |
| cLOR <sub>45</sub> | 0.999 (0.001)                   | 0.976 (0.005) | 0.979 (0.005) | 0.998 (0.001) | 0.982 (0.004) |
| $\mu_1$            | 0.973 (0.005)                   | 0.939 (0.008) | 0.928 (0.008) | 0.983 (0.004) | 0.964 (0.006) |
| $\mu_2$            | 0.979 (0.005)                   | 0.957 (0.006) | 0.967 (0.006) | 0.975 (0.005) | 0.964 (0.006) |
| $\mu_3$            | 0.999 (0.001)                   | 0.983 (0.004) | 0.981 (0.004) | 0.996 (0.002) | 0.984 (0.004) |
| $\mu_4$            | 0.997 (0.002)                   | 0.958 (0.006) | 0.961 (0.006) | 0.994 (0.002) | 0.977 (0.005) |
| $\mu_5$            | 0.999 (0.001)                   | 0.972 (0.005) | 0.975 (0.005) | 0.999 (0.001) | 0.983 (0.004) |
| $p_1$              | 0.968 (0.006)                   | 0.929 (0.008) | 0.925 (0.008) | 0.974 (0.005) | 0.958 (0.006) |
| $p_2$              | 0.962 (0.006)                   | 0.957 (0.006) | 0.955 (0.007) | 0.960 (0.006) | 0.953 (0.007) |
| $p_3$              | 0.983 (0.004)                   | 0.968 (0.006) | 0.973 (0.005) | 0.969 (0.005) | 0.975 (0.005) |
| $p_4$              | 0.990 (0.003)                   | 0.958 (0.006) | 0.961 (0.006) | 0.992 (0.003) | 0.981 (0.004) |
| $p_5$              | 0.996 (0.002)                   | 0.974 (0.005) | 0.978 (0.005) | 0.997 (0.002) | 0.977 (0.005) |
| $\delta_1$         | 0.939 (0.008)                   | 0.906 (0.009) | 0.896 (0.010) | 0.943 (0.007) | 0.896 (0.010) |
| $\delta_2$         | 0.910 (0.009)                   | 0.953 (0.007) | 0.932 (0.008) | 0.924 (0.008) | 0.956 (0.006) |
| $\delta_3$         | 0.955 (0.007)                   | 0.973 (0.005) | 0.928 (0.008) | 0.967 (0.006) | 0.977 (0.005) |
| $\delta_4$         | 0.956 (0.006)                   | 0.991 (0.003) | 0.991 (0.003) | 0.962 (0.006) | 0.994 (0.002) |
| $\delta_5$         | 0.933 (0.008)                   | 0.977 (0.005) | 0.976 (0.005) | 0.948 (0.007) | 0.987 (0.004) |
| $\rho$             | 1.000 (0.000)                   | 0.996 (0.002) | 0.996 (0.002) | 0.997 (0.002) | 0.997 (0.002) |

TABLE C18

*Simulation results comparing data generated under the EM-EV scenario with MAR missingness of treatment arms. The 95% CrI's estimated coverage probability (CP) and the Monte Carlo standard error of the posterior median are summarized for the five methods (NB, CPV, FBV, CPM, and DCP).*

| Parameter          | CP (Monte Carlo standard error) |               |               |               |               |
|--------------------|---------------------------------|---------------|---------------|---------------|---------------|
|                    | NB                              | CPV           | FBV           | CPM           | DCP           |
| cLOR <sub>12</sub> | 0.982 (0.004)                   | 0.965 (0.006) | 0.974 (0.005) | 0.987 (0.004) | 0.973 (0.005) |
| cLOR <sub>13</sub> | 0.999 (0.001)                   | 0.985 (0.004) | 0.978 (0.005) | 0.995 (0.002) | 0.978 (0.005) |
| cLOR <sub>14</sub> | 0.996 (0.002)                   | 0.962 (0.006) | 0.962 (0.006) | 0.996 (0.002) | 0.972 (0.005) |
| cLOR <sub>15</sub> | 0.998 (0.001)                   | 0.988 (0.003) | 0.989 (0.003) | 1.000 (0.000) | 0.993 (0.003) |
| cLOR <sub>23</sub> | 1.000 (0.000)                   | 0.992 (0.003) | 0.992 (0.003) | 0.996 (0.002) | 0.986 (0.004) |
| cLOR <sub>24</sub> | 0.994 (0.002)                   | 0.975 (0.005) | 0.977 (0.005) | 0.993 (0.003) | 0.986 (0.004) |
| cLOR <sub>25</sub> | 0.997 (0.002)                   | 0.982 (0.004) | 0.985 (0.004) | 0.996 (0.002) | 0.990 (0.003) |
| cLOR <sub>34</sub> | 0.999 (0.001)                   | 0.984 (0.004) | 0.985 (0.004) | 0.996 (0.002) | 0.981 (0.004) |
| cLOR <sub>35</sub> | 0.999 (0.001)                   | 0.987 (0.004) | 0.985 (0.004) | 0.998 (0.001) | 0.982 (0.004) |
| cLOR <sub>45</sub> | 1.000 (0.000)                   | 0.989 (0.003) | 0.990 (0.003) | 1.000 (0.000) | 0.987 (0.004) |
| $\mu_1$            | 0.975 (0.005)                   | 0.936 (0.008) | 0.927 (0.008) | 0.982 (0.004) | 0.963 (0.006) |
| $\mu_2$            | 0.984 (0.004)                   | 0.960 (0.006) | 0.972 (0.005) | 0.983 (0.004) | 0.972 (0.005) |
| $\mu_3$            | 0.999 (0.001)                   | 0.983 (0.004) | 0.979 (0.005) | 0.996 (0.002) | 0.979 (0.005) |
| $\mu_4$            | 0.995 (0.002)                   | 0.956 (0.006) | 0.960 (0.006) | 0.996 (0.002) | 0.965 (0.006) |
| $\mu_5$            | 0.999 (0.001)                   | 0.983 (0.004) | 0.986 (0.004) | 0.999 (0.001) | 0.989 (0.003) |
| $p_1$              | 0.967 (0.006)                   | 0.928 (0.008) | 0.924 (0.008) | 0.973 (0.005) | 0.960 (0.006) |
| $p_2$              | 0.974 (0.005)                   | 0.960 (0.006) | 0.969 (0.005) | 0.968 (0.006) | 0.967 (0.006) |
| $p_3$              | 0.985 (0.004)                   | 0.972 (0.005) | 0.975 (0.005) | 0.967 (0.006) | 0.976 (0.005) |
| $p_4$              | 0.984 (0.004)                   | 0.963 (0.006) | 0.965 (0.006) | 0.990 (0.003) | 0.977 (0.005) |
| $p_5$              | 0.994 (0.002)                   | 0.986 (0.004) | 0.986 (0.004) | 0.995 (0.002) | 0.993 (0.003) |
| $\delta_1$         | 0.945 (0.007)                   | 0.902 (0.009) | 0.892 (0.010) | 0.947 (0.007) | 0.899 (0.010) |
| $\delta_2$         | 0.921 (0.009)                   | 0.952 (0.007) | 0.927 (0.008) | 0.933 (0.008) | 0.955 (0.007) |
| $\delta_3$         | 0.935 (0.008)                   | 0.965 (0.006) | 0.920 (0.009) | 0.950 (0.007) | 0.979 (0.005) |
| $\delta_4$         | 0.955 (0.007)                   | 0.996 (0.002) | 0.994 (0.002) | 0.969 (0.005) | 0.996 (0.002) |
| $\delta_5$         | 0.931 (0.008)                   | 0.986 (0.004) | 0.984 (0.004) | 0.958 (0.006) | 0.986 (0.004) |
| $\rho$             | 1.000 (0.000)                   | 1.000 (0.000) | 1.000 (0.000) | 1.000 (0.000) | 1.000 (0.000) |

TABLE C19

*Simulation results comparing data generated under the UM-EV scenario with MCAR missingness of treatment arms. The 95% CrI's estimated coverage probability (CP) and the Monte Carlo standard error of the posterior median are summarized for the five methods (NB, CPV, FBV, CPM, and DCP).*

| Parameter          | CP (Monte Carlo standard error) |               |               |               |               |
|--------------------|---------------------------------|---------------|---------------|---------------|---------------|
|                    | NB                              | CPV           | FBV           | CPM           | DCP           |
| cLOR <sub>12</sub> | 0.982 (0.004)                   | 0.960 (0.006) | 0.965 (0.006) | 0.973 (0.005) | 0.967 (0.006) |
| cLOR <sub>13</sub> | 0.999 (0.001)                   | 0.983 (0.004) | 0.982 (0.004) | 0.993 (0.003) | 0.974 (0.005) |
| cLOR <sub>14</sub> | 0.995 (0.002)                   | 0.966 (0.006) | 0.966 (0.006) | 0.972 (0.005) | 0.933 (0.008) |
| cLOR <sub>15</sub> | 0.999 (0.001)                   | 0.976 (0.005) | 0.978 (0.005) | 0.990 (0.003) | 0.955 (0.007) |
| cLOR <sub>23</sub> | 0.999 (0.001)                   | 0.986 (0.004) | 0.985 (0.004) | 0.996 (0.002) | 0.978 (0.005) |
| cLOR <sub>24</sub> | 0.995 (0.002)                   | 0.970 (0.005) | 0.970 (0.005) | 0.964 (0.006) | 0.952 (0.007) |
| cLOR <sub>25</sub> | 0.998 (0.001)                   | 0.977 (0.005) | 0.980 (0.004) | 0.976 (0.005) | 0.956 (0.006) |
| cLOR <sub>34</sub> | 1.000 (0.000)                   | 0.976 (0.005) | 0.976 (0.005) | 0.985 (0.004) | 0.962 (0.006) |
| cLOR <sub>35</sub> | 0.999 (0.001)                   | 0.986 (0.004) | 0.985 (0.004) | 0.989 (0.003) | 0.972 (0.005) |
| cLOR <sub>45</sub> | 0.999 (0.001)                   | 0.979 (0.005) | 0.980 (0.004) | 1.000 (0.000) | 0.988 (0.003) |
| $\mu_1$            | 0.975 (0.005)                   | 0.933 (0.008) | 0.911 (0.009) | 0.969 (0.005) | 0.933 (0.008) |
| $\mu_2$            | 0.979 (0.005)                   | 0.957 (0.006) | 0.962 (0.006) | 0.970 (0.005) | 0.956 (0.006) |
| $\mu_3$            | 0.999 (0.001)                   | 0.978 (0.005) | 0.981 (0.004) | 0.991 (0.003) | 0.968 (0.006) |
| $\mu_4$            | 0.998 (0.001)                   | 0.963 (0.006) | 0.966 (0.006) | 0.958 (0.006) | 0.910 (0.009) |
| $\mu_5$            | 0.999 (0.001)                   | 0.976 (0.005) | 0.983 (0.004) | 0.989 (0.003) | 0.955 (0.007) |
| $p_1$              | 0.967 (0.006)                   | 0.922 (0.008) | 0.908 (0.009) | 0.960 (0.006) | 0.926 (0.008) |
| $p_2$              | 0.963 (0.006)                   | 0.953 (0.007) | 0.956 (0.006) | 0.927 (0.008) | 0.937 (0.008) |
| $p_3$              | 0.983 (0.004)                   | 0.968 (0.006) | 0.970 (0.005) | 0.926 (0.008) | 0.940 (0.008) |
| $p_4$              | 0.990 (0.003)                   | 0.970 (0.005) | 0.972 (0.005) | 0.999 (0.001) | 0.930 (0.008) |
| $p_5$              | 0.997 (0.002)                   | 0.978 (0.005) | 0.980 (0.004) | 1.000 (0.000) | 0.966 (0.006) |
| $\delta_1$         | 0.940 (0.008)                   | 0.883 (0.010) | 0.817 (0.012) | 0.941 (0.007) | 0.884 (0.010) |
| $\delta_2$         | 0.913 (0.009)                   | 0.960 (0.006) | 0.942 (0.007) | 0.929 (0.008) | 0.964 (0.006) |
| $\delta_3$         | 0.956 (0.006)                   | 0.974 (0.005) | 0.930 (0.008) | 0.968 (0.006) | 0.979 (0.005) |
| $\delta_4$         | 0.955 (0.007)                   | 0.989 (0.003) | 0.990 (0.003) | 0.946 (0.007) | 0.984 (0.004) |
| $\delta_5$         | 0.930 (0.008)                   | 0.974 (0.005) | 0.972 (0.005) | 0.931 (0.008) | 0.973 (0.005) |
| $\rho$             | 1.000 (0.000)                   | 0.996 (0.002) | 0.995 (0.002) | 0.998 (0.001) | 0.994 (0.002) |



TABLE C20

*Simulation results comparing data generated under the UM-EV scenario with MAR missingness of treatment arms. The 95% CrI's estimated coverage probability (CP) and the Monte Carlo standard error of the posterior median are summarized for the five methods (NB, CPV, FBV, CPM, and DCP).*

| Parameter          | CP (Monte Carlo standard error) |               |               |               |               |
|--------------------|---------------------------------|---------------|---------------|---------------|---------------|
|                    | NB                              | CPV           | FBV           | CPM           | DCP           |
| cLOR <sub>12</sub> | 0.982 (0.004)                   | 0.967 (0.006) | 0.973 (0.005) | 0.981 (0.004) | 0.960 (0.006) |
| cLOR <sub>13</sub> | 0.999 (0.001)                   | 0.986 (0.004) | 0.980 (0.004) | 0.992 (0.003) | 0.973 (0.005) |
| cLOR <sub>14</sub> | 0.998 (0.001)                   | 0.964 (0.006) | 0.965 (0.006) | 0.975 (0.005) | 0.934 (0.008) |
| cLOR <sub>15</sub> | 0.998 (0.001)                   | 0.992 (0.003) | 0.991 (0.003) | 0.995 (0.002) | 0.939 (0.008) |
| cLOR <sub>23</sub> | 1.000 (0.000)                   | 0.990 (0.003) | 0.989 (0.003) | 0.996 (0.002) | 0.990 (0.003) |
| cLOR <sub>24</sub> | 0.994 (0.002)                   | 0.974 (0.005) | 0.976 (0.005) | 0.977 (0.005) | 0.948 (0.007) |
| cLOR <sub>25</sub> | 0.997 (0.002)                   | 0.985 (0.004) | 0.987 (0.004) | 0.994 (0.002) | 0.956 (0.006) |
| cLOR <sub>34</sub> | 0.999 (0.001)                   | 0.984 (0.004) | 0.984 (0.004) | 0.986 (0.004) | 0.959 (0.006) |
| cLOR <sub>35</sub> | 0.999 (0.001)                   | 0.994 (0.002) | 0.989 (0.003) | 0.996 (0.002) | 0.966 (0.006) |
| cLOR <sub>45</sub> | 1.000 (0.000)                   | 0.994 (0.002) | 0.995 (0.002) | 1.000 (0.000) | 0.989 (0.003) |
| $\mu_1$            | 0.975 (0.005)                   | 0.930 (0.008) | 0.907 (0.009) | 0.970 (0.005) | 0.929 (0.008) |
| $\mu_2$            | 0.983 (0.004)                   | 0.962 (0.006) | 0.968 (0.006) | 0.977 (0.005) | 0.955 (0.007) |
| $\mu_3$            | 0.999 (0.001)                   | 0.983 (0.004) | 0.979 (0.005) | 0.992 (0.003) | 0.971 (0.005) |
| $\mu_4$            | 0.995 (0.002)                   | 0.961 (0.006) | 0.963 (0.006) | 0.974 (0.005) | 0.900 (0.009) |
| $\mu_5$            | 0.999 (0.001)                   | 0.987 (0.004) | 0.992 (0.003) | 0.997 (0.002) | 0.929 (0.008) |
| $p_1$              | 0.966 (0.006)                   | 0.922 (0.008) | 0.910 (0.009) | 0.956 (0.006) | 0.927 (0.008) |
| $p_2$              | 0.974 (0.005)                   | 0.956 (0.006) | 0.963 (0.006) | 0.934 (0.008) | 0.941 (0.007) |
| $p_3$              | 0.984 (0.004)                   | 0.970 (0.005) | 0.973 (0.005) | 0.931 (0.008) | 0.952 (0.007) |
| $p_4$              | 0.984 (0.004)                   | 0.963 (0.006) | 0.967 (0.006) | 0.998 (0.001) | 0.925 (0.008) |
| $p_5$              | 0.994 (0.002)                   | 0.989 (0.003) | 0.991 (0.003) | 1.000 (0.000) | 0.950 (0.007) |
| $\delta_1$         | 0.946 (0.007)                   | 0.884 (0.010) | 0.814 (0.012) | 0.947 (0.007) | 0.878 (0.010) |
| $\delta_2$         | 0.922 (0.008)                   | 0.951 (0.007) | 0.930 (0.008) | 0.950 (0.007) | 0.959 (0.006) |
| $\delta_3$         | 0.934 (0.008)                   | 0.964 (0.006) | 0.922 (0.008) | 0.960 (0.006) | 0.979 (0.005) |
| $\delta_4$         | 0.955 (0.007)                   | 0.991 (0.003) | 0.987 (0.004) | 0.961 (0.006) | 0.989 (0.003) |
| $\delta_5$         | 0.932 (0.008)                   | 0.982 (0.004) | 0.980 (0.004) | 0.957 (0.006) | 0.986 (0.004) |
| $\rho$             | 1.000 (0.000)                   | 1.000 (0.000) | 1.000 (0.000) | 1.000 (0.000) | 1.000 (0.000) |

TABLE C21

Simulation results comparing data generated under the EM-UV scenario with MCAR missingness of treatment arms. The 95% CrI's estimated coverage probability (CP) and the Monte Carlo standard error of the posterior median are summarized for the five methods (NB, CPV, FBV, CPM, and DCP).

| Parameter          | CP (Monte Carlo standard error) |               |               |               |               |
|--------------------|---------------------------------|---------------|---------------|---------------|---------------|
|                    | NB                              | CPV           | FBV           | CPM           | DCP           |
| cLOR <sub>12</sub> | 0.981 (0.004)                   | 0.943 (0.007) | 0.962 (0.006) | 0.978 (0.005) | 0.950 (0.007) |
| cLOR <sub>13</sub> | 0.999 (0.001)                   | 0.920 (0.009) | 0.904 (0.009) | 1.000 (0.000) | 0.980 (0.004) |
| cLOR <sub>14</sub> | 0.995 (0.002)                   | 0.992 (0.003) | 0.997 (0.002) | 0.993 (0.003) | 0.989 (0.003) |
| cLOR <sub>15</sub> | 0.999 (0.001)                   | 0.993 (0.003) | 0.997 (0.002) | 0.996 (0.002) | 0.992 (0.003) |
| cLOR <sub>23</sub> | 0.999 (0.001)                   | 0.942 (0.007) | 0.929 (0.008) | 0.997 (0.002) | 0.966 (0.006) |
| cLOR <sub>24</sub> | 0.995 (0.002)                   | 0.978 (0.005) | 0.981 (0.004) | 0.989 (0.003) | 0.973 (0.005) |
| cLOR <sub>25</sub> | 0.999 (0.001)                   | 0.990 (0.003) | 0.990 (0.003) | 0.995 (0.002) | 0.986 (0.004) |
| cLOR <sub>34</sub> | 1.000 (0.000)                   | 0.943 (0.007) | 0.929 (0.008) | 0.999 (0.001) | 0.982 (0.004) |
| cLOR <sub>35</sub> | 1.000 (0.000)                   | 0.970 (0.005) | 0.954 (0.007) | 1.000 (0.000) | 0.988 (0.003) |
| cLOR <sub>45</sub> | 0.999 (0.001)                   | 0.997 (0.002) | 0.998 (0.001) | 0.998 (0.001) | 0.995 (0.002) |
| $\mu_1$            | 0.975 (0.005)                   | 0.973 (0.005) | 1.000 (0.000) | 0.970 (0.005) | 0.969 (0.005) |
| $\mu_2$            | 0.979 (0.005)                   | 0.942 (0.007) | 0.950 (0.007) | 0.981 (0.004) | 0.948 (0.007) |
| $\mu_3$            | 0.998 (0.001)                   | 0.908 (0.009) | 0.884 (0.010) | 0.999 (0.001) | 0.977 (0.005) |
| $\mu_4$            | 0.999 (0.001)                   | 0.992 (0.003) | 0.997 (0.002) | 0.991 (0.003) | 0.989 (0.003) |
| $\mu_5$            | 0.999 (0.001)                   | 0.990 (0.003) | 0.991 (0.003) | 0.998 (0.001) | 0.992 (0.003) |
| $p_1$              | 0.968 (0.006)                   | 0.968 (0.006) | 0.987 (0.004) | 0.956 (0.006) | 0.960 (0.006) |
| $p_2$              | 0.964 (0.006)                   | 0.935 (0.008) | 0.921 (0.009) | 0.967 (0.006) | 0.952 (0.007) |
| $p_3$              | 0.982 (0.004)                   | 0.918 (0.009) | 0.886 (0.010) | 0.983 (0.004) | 0.963 (0.006) |
| $p_4$              | 0.991 (0.003)                   | 0.991 (0.003) | 0.993 (0.003) | 0.991 (0.003) | 0.990 (0.003) |
| $p_5$              | 0.996 (0.002)                   | 0.989 (0.003) | 0.992 (0.003) | 0.990 (0.003) | 0.985 (0.004) |
| $\delta_1$         | 0.940 (0.008)                   | 0.939 (0.008) | 0.017 (0.004) | 0.941 (0.007) | 0.941 (0.007) |
| $\delta_2$         | 0.911 (0.009)                   | 0.944 (0.007) | 0.933 (0.008) | 0.929 (0.008) | 0.948 (0.007) |
| $\delta_3$         | 0.956 (0.006)                   | 0.983 (0.004) | 0.987 (0.004) | 0.966 (0.006) | 0.968 (0.006) |
| $\delta_4$         | 0.956 (0.006)                   | 0.944 (0.007) | 0.435 (0.016) | 0.958 (0.006) | 0.949 (0.007) |
| $\delta_5$         | 0.932 (0.008)                   | 0.939 (0.008) | 0.540 (0.016) | 0.939 (0.008) | 0.939 (0.008) |
| $\rho$             | 1.000 (0.000)                   | 0.999 (0.001) | 0.997 (0.002) | 0.997 (0.002) | 0.997 (0.002) |

TABLE C22

*Simulation results comparing data generated under the EM-UV scenario with MAR missingness of treatment arms. The 95% CrI's estimated coverage probability (CP) and the Monte Carlo standard error of the posterior median are summarized for the five methods (NB, CPV, FBV, CPM, and DCP).*

| Parameter          | CP (Monte Carlo standard error) |               |               |               |               |
|--------------------|---------------------------------|---------------|---------------|---------------|---------------|
|                    | NB                              | CPV           | FBV           | CPM           | DCP           |
| cLOR <sub>12</sub> | 0.981 (0.004)                   | 0.959 (0.006) | 0.963 (0.006) | 0.988 (0.003) | 0.977 (0.005) |
| cLOR <sub>13</sub> | 0.999 (0.001)                   | 0.933 (0.008) | 0.925 (0.008) | 0.999 (0.001) | 0.968 (0.006) |
| cLOR <sub>14</sub> | 0.998 (0.001)                   | 0.993 (0.003) | 0.999 (0.001) | 0.991 (0.003) | 0.990 (0.003) |
| cLOR <sub>15</sub> | 0.999 (0.001)                   | 0.997 (0.002) | 0.998 (0.001) | 0.995 (0.002) | 0.994 (0.002) |
| cLOR <sub>23</sub> | 1.000 (0.000)                   | 0.970 (0.005) | 0.956 (0.006) | 0.998 (0.001) | 0.977 (0.005) |
| cLOR <sub>24</sub> | 0.995 (0.002)                   | 0.983 (0.004) | 0.980 (0.004) | 0.993 (0.003) | 0.987 (0.004) |
| cLOR <sub>25</sub> | 0.997 (0.002)                   | 0.994 (0.002) | 0.990 (0.003) | 0.996 (0.002) | 0.994 (0.002) |
| cLOR <sub>34</sub> | 0.999 (0.001)                   | 0.957 (0.006) | 0.945 (0.007) | 0.998 (0.001) | 0.977 (0.005) |
| cLOR <sub>35</sub> | 0.999 (0.001)                   | 0.975 (0.005) | 0.963 (0.006) | 1.000 (0.000) | 0.983 (0.004) |
| cLOR <sub>45</sub> | 1.000 (0.000)                   | 1.000 (0.000) | 1.000 (0.000) | 0.998 (0.001) | 0.999 (0.001) |
| $\mu_1$            | 0.976 (0.005)                   | 0.974 (0.005) | 1.000 (0.000) | 0.968 (0.006) | 0.969 (0.005) |
| $\mu_2$            | 0.982 (0.004)                   | 0.955 (0.007) | 0.952 (0.007) | 0.990 (0.003) | 0.973 (0.005) |
| $\mu_3$            | 0.999 (0.001)                   | 0.931 (0.008) | 0.907 (0.009) | 0.998 (0.001) | 0.970 (0.005) |
| $\mu_4$            | 0.995 (0.002)                   | 0.990 (0.003) | 0.991 (0.003) | 0.989 (0.003) | 0.986 (0.004) |
| $\mu_5$            | 0.999 (0.001)                   | 0.996 (0.002) | 0.995 (0.002) | 0.996 (0.002) | 0.990 (0.003) |
| $p_1$              | 0.966 (0.006)                   | 0.968 (0.006) | 0.987 (0.004) | 0.960 (0.006) | 0.962 (0.006) |
| $p_2$              | 0.972 (0.005)                   | 0.949 (0.007) | 0.898 (0.010) | 0.980 (0.004) | 0.955 (0.007) |
| $p_3$              | 0.986 (0.004)                   | 0.926 (0.008) | 0.903 (0.009) | 0.972 (0.005) | 0.971 (0.005) |
| $p_4$              | 0.984 (0.004)                   | 0.988 (0.003) | 0.989 (0.003) | 0.981 (0.004) | 0.981 (0.004) |
| $p_5$              | 0.993 (0.003)                   | 0.997 (0.002) | 0.993 (0.003) | 0.990 (0.003) | 0.986 (0.004) |
| $\delta_1$         | 0.943 (0.007)                   | 0.938 (0.008) | 0.017 (0.004) | 0.943 (0.007) | 0.939 (0.008) |
| $\delta_2$         | 0.922 (0.008)                   | 0.946 (0.007) | 0.958 (0.006) | 0.934 (0.008) | 0.940 (0.008) |
| $\delta_3$         | 0.934 (0.008)                   | 0.988 (0.003) | 0.994 (0.002) | 0.953 (0.007) | 0.979 (0.005) |
| $\delta_4$         | 0.954 (0.007)                   | 0.958 (0.006) | 0.462 (0.016) | 0.957 (0.006) | 0.962 (0.006) |
| $\delta_5$         | 0.933 (0.008)                   | 0.939 (0.008) | 0.547 (0.016) | 0.948 (0.007) | 0.952 (0.007) |
| $\rho$             | 1.000 (0.000)                   | 1.000 (0.000) | 0.997 (0.002) | 1.000 (0.000) | 1.000 (0.000) |

TABLE C23

*Simulation results comparing data generated under the UM-UV scenario with MCAR missingness of treatment arms. The 95% CrI's estimated coverage probability (CP) and the Monte Carlo standard error of the posterior median are summarized for the five methods (NB, CPV, FBV, CPM, and DCP).*

| Parameter          | CP (Monte Carlo standard error) |               |               |               |               |
|--------------------|---------------------------------|---------------|---------------|---------------|---------------|
|                    | NB                              | CPV           | FBV           | CPM           | DCP           |
| cLOR <sub>12</sub> | 0.981 (0.004)                   | 0.937 (0.008) | 0.955 (0.007) | 0.980 (0.004) | 0.953 (0.007) |
| cLOR <sub>13</sub> | 0.999 (0.001)                   | 0.907 (0.009) | 0.899 (0.010) | 0.993 (0.003) | 0.919 (0.009) |
| cLOR <sub>14</sub> | 0.994 (0.002)                   | 0.991 (0.003) | 0.998 (0.001) | 0.989 (0.003) | 0.988 (0.003) |
| cLOR <sub>15</sub> | 0.999 (0.001)                   | 0.997 (0.002) | 0.999 (0.001) | 0.995 (0.002) | 0.988 (0.003) |
| cLOR <sub>23</sub> | 0.999 (0.001)                   | 0.937 (0.008) | 0.909 (0.009) | 0.999 (0.001) | 0.956 (0.006) |
| cLOR <sub>24</sub> | 0.995 (0.002)                   | 0.975 (0.005) | 0.981 (0.004) | 0.983 (0.004) | 0.963 (0.006) |
| cLOR <sub>25</sub> | 0.999 (0.001)                   | 0.984 (0.004) | 0.984 (0.004) | 0.987 (0.004) | 0.970 (0.005) |
| cLOR <sub>34</sub> | 1.000 (0.000)                   | 0.939 (0.008) | 0.925 (0.008) | 0.987 (0.004) | 0.923 (0.008) |
| cLOR <sub>35</sub> | 1.000 (0.000)                   | 0.964 (0.006) | 0.952 (0.007) | 0.996 (0.002) | 0.957 (0.006) |
| cLOR <sub>45</sub> | 0.999 (0.001)                   | 0.997 (0.002) | 0.998 (0.001) | 0.998 (0.001) | 0.994 (0.002) |
| $\mu_1$            | 0.974 (0.005)                   | 0.973 (0.005) | 1.000 (0.000) | 0.955 (0.007) | 0.960 (0.006) |
| $\mu_2$            | 0.978 (0.005)                   | 0.932 (0.008) | 0.939 (0.008) | 0.973 (0.005) | 0.941 (0.007) |
| $\mu_3$            | 0.999 (0.001)                   | 0.898 (0.010) | 0.857 (0.011) | 0.992 (0.003) | 0.900 (0.009) |
| $\mu_4$            | 0.999 (0.001)                   | 0.991 (0.003) | 0.995 (0.002) | 0.991 (0.003) | 0.982 (0.004) |
| $\mu_5$            | 0.999 (0.001)                   | 0.994 (0.002) | 0.996 (0.002) | 0.995 (0.002) | 0.988 (0.003) |
| $p_1$              | 0.967 (0.006)                   | 0.968 (0.006) | 0.985 (0.004) | 0.946 (0.007) | 0.949 (0.007) |
| $p_2$              | 0.962 (0.006)                   | 0.928 (0.008) | 0.922 (0.008) | 0.918 (0.009) | 0.934 (0.008) |
| $p_3$              | 0.983 (0.004)                   | 0.904 (0.009) | 0.871 (0.011) | 0.897 (0.010) | 0.916 (0.009) |
| $p_4$              | 0.991 (0.003)                   | 0.990 (0.003) | 0.992 (0.003) | 0.996 (0.002) | 0.990 (0.003) |
| $p_5$              | 0.996 (0.002)                   | 0.993 (0.003) | 0.993 (0.003) | 0.998 (0.001) | 0.992 (0.003) |
| $\delta_1$         | 0.941 (0.007)                   | 0.941 (0.007) | 0.005 (0.002) | 0.938 (0.008) | 0.942 (0.007) |
| $\delta_2$         | 0.913 (0.009)                   | 0.938 (0.008) | 0.949 (0.007) | 0.932 (0.008) | 0.941 (0.007) |
| $\delta_3$         | 0.957 (0.006)                   | 0.978 (0.005) | 0.972 (0.005) | 0.968 (0.006) | 0.945 (0.007) |
| $\delta_4$         | 0.956 (0.006)                   | 0.955 (0.007) | 0.516 (0.016) | 0.955 (0.007) | 0.948 (0.007) |
| $\delta_5$         | 0.932 (0.008)                   | 0.933 (0.008) | 0.583 (0.016) | 0.929 (0.008) | 0.932 (0.008) |
| $\rho$             | 1.000 (0.000)                   | 0.999 (0.001) | 0.998 (0.001) | 0.997 (0.002) | 0.999 (0.001) |

TABLE C24

*Simulation results comparing data generated under the UM-UV scenario with MAR missingness of treatment arms. The 95% CrI's estimated coverage probability (CP) and the Monte Carlo standard error of the posterior median are summarized for the five methods (NB, CPV, FBV, CPM, and DCP).*

| Parameter          | CP (Monte Carlo standard error) |               |               |               |               |
|--------------------|---------------------------------|---------------|---------------|---------------|---------------|
|                    | NB                              | CPV           | FBV           | CPM           | DCP           |
| cLOR <sub>12</sub> | 0.983 (0.004)                   | 0.948 (0.007) | 0.951 (0.007) | 0.984 (0.004) | 0.952 (0.007) |
| cLOR <sub>13</sub> | 0.999 (0.001)                   | 0.922 (0.008) | 0.914 (0.009) | 0.995 (0.002) | 0.932 (0.008) |
| cLOR <sub>14</sub> | 0.999 (0.001)                   | 0.993 (0.003) | 0.999 (0.001) | 0.992 (0.003) | 0.984 (0.004) |
| cLOR <sub>15</sub> | 0.999 (0.001)                   | 0.999 (0.001) | 1.000 (0.000) | 0.999 (0.001) | 0.989 (0.003) |
| cLOR <sub>23</sub> | 1.000 (0.000)                   | 0.963 (0.006) | 0.939 (0.008) | 0.999 (0.001) | 0.980 (0.004) |
| cLOR <sub>24</sub> | 0.995 (0.002)                   | 0.980 (0.004) | 0.972 (0.005) | 0.981 (0.004) | 0.962 (0.006) |
| cLOR <sub>25</sub> | 0.997 (0.002)                   | 0.990 (0.003) | 0.991 (0.003) | 1.000 (0.000) | 0.988 (0.003) |
| cLOR <sub>34</sub> | 0.999 (0.001)                   | 0.951 (0.007) | 0.937 (0.008) | 0.998 (0.001) | 0.935 (0.008) |
| cLOR <sub>35</sub> | 0.998 (0.001)                   | 0.973 (0.005) | 0.965 (0.006) | 1.000 (0.000) | 0.966 (0.006) |
| cLOR <sub>45</sub> | 1.000 (0.000)                   | 1.000 (0.000) | 1.000 (0.000) | 1.000 (0.000) | 0.997 (0.002) |
| $\mu_1$            | 0.974 (0.005)                   | 0.973 (0.005) | 1.000 (0.000) | 0.956 (0.006) | 0.964 (0.006) |
| $\mu_2$            | 0.984 (0.004)                   | 0.945 (0.007) | 0.939 (0.008) | 0.983 (0.004) | 0.943 (0.007) |
| $\mu_3$            | 0.999 (0.001)                   | 0.913 (0.009) | 0.875 (0.010) | 0.996 (0.002) | 0.913 (0.009) |
| $\mu_4$            | 0.995 (0.002)                   | 0.992 (0.003) | 0.992 (0.003) | 0.995 (0.002) | 0.984 (0.004) |
| $\mu_5$            | 0.999 (0.001)                   | 0.999 (0.001) | 0.999 (0.001) | 0.999 (0.001) | 0.985 (0.004) |
| $p_1$              | 0.967 (0.006)                   | 0.966 (0.006) | 0.985 (0.004) | 0.943 (0.007) | 0.949 (0.007) |
| $p_2$              | 0.974 (0.005)                   | 0.940 (0.008) | 0.884 (0.010) | 0.927 (0.008) | 0.929 (0.008) |
| $p_3$              | 0.983 (0.004)                   | 0.919 (0.009) | 0.884 (0.010) | 0.888 (0.010) | 0.925 (0.008) |
| $p_4$              | 0.984 (0.004)                   | 0.988 (0.003) | 0.990 (0.003) | 0.991 (0.003) | 0.989 (0.003) |
| $p_5$              | 0.995 (0.002)                   | 0.997 (0.002) | 0.996 (0.002) | 0.998 (0.001) | 0.989 (0.003) |
| $\delta_1$         | 0.944 (0.007)                   | 0.939 (0.008) | 0.005 (0.002) | 0.944 (0.007) | 0.939 (0.008) |
| $\delta_2$         | 0.922 (0.008)                   | 0.944 (0.007) | 0.964 (0.006) | 0.956 (0.006) | 0.931 (0.008) |
| $\delta_3$         | 0.935 (0.008)                   | 0.988 (0.003) | 0.990 (0.003) | 0.960 (0.006) | 0.966 (0.006) |
| $\delta_4$         | 0.955 (0.007)                   | 0.959 (0.006) | 0.533 (0.016) | 0.964 (0.006) | 0.962 (0.006) |
| $\delta_5$         | 0.932 (0.008)                   | 0.948 (0.007) | 0.579 (0.016) | 0.950 (0.007) | 0.957 (0.006) |
| $\rho$             | 1.000 (0.000)                   | 1.000 (0.000) | 1.000 (0.000) | 1.000 (0.000) | 1.000 (0.000) |

**C.4. Empirical standard error (Empse).** Tables C25–C32 provide the empirical standard error and the Monte Carlo standard error of the posterior median for the five methods (NB, CPV, FBV, CPM, and DCP) using different data-generating mechanisms (EM-EV, UM-EV, EM-UV, and UM-UV) and missingness structures (MCAR and MAR). The relative percent increase in precision comparing four methods (CPV, FBV, CPM, and DCP) versus NB is also summarized.

TABLE C25

*Simulation results comparing data generated under the EM-EV scenario with MCAR missingness of treatment arms. The Empse and the Monte Carlo standard error of the posterior median are rounded to 3 decimal places for the five methods (NB, CPV, FBV, CPM, and DCP). The relative percent increase in precision when comparing four methods (CPV, FBV, CPM, and DCP) versus NB is also summarized.*

| Parameter          | Empse (Monte Carlo standard error) |               |               |               |               | Relative % increase in precision |       |       |       |
|--------------------|------------------------------------|---------------|---------------|---------------|---------------|----------------------------------|-------|-------|-------|
|                    | NB                                 | CPV           | FBV           | CPM           | DCP           | CPV                              | FBV   | CPM   | DCP   |
| cLOR <sub>12</sub> | 0.520 (0.012)                      | 0.500 (0.011) | 0.503 (0.011) | 0.426 (0.010) | 0.425 (0.010) | 8.1                              | 6.6   | 48.6  | 49.8  |
| cLOR <sub>13</sub> | 0.813 (0.018)                      | 0.803 (0.018) | 0.792 (0.018) | 0.520 (0.012) | 0.543 (0.012) | 2.7                              | 5.4   | 144.4 | 124.5 |
| cLOR <sub>14</sub> | 0.215 (0.005)                      | 0.208 (0.005) | 0.208 (0.005) | 0.148 (0.003) | 0.157 (0.004) | 7.0                              | 7.4   | 111.4 | 88.9  |
| cLOR <sub>15</sub> | 0.235 (0.005)                      | 0.224 (0.005) | 0.223 (0.005) | 0.163 (0.004) | 0.172 (0.004) | 10.3                             | 10.5  | 106.5 | 87.4  |
| cLOR <sub>23</sub> | 0.995 (0.022)                      | 0.972 (0.022) | 0.965 (0.022) | 0.682 (0.015) | 0.698 (0.016) | 4.8                              | 6.4   | 112.7 | 103.2 |
| cLOR <sub>24</sub> | 0.568 (0.013)                      | 0.544 (0.012) | 0.547 (0.012) | 0.444 (0.010) | 0.447 (0.010) | 9.2                              | 7.8   | 64.0  | 61.2  |
| cLOR <sub>25</sub> | 0.590 (0.013)                      | 0.559 (0.013) | 0.563 (0.013) | 0.455 (0.010) | 0.460 (0.010) | 11.3                             | 9.9   | 68.1  | 64.7  |
| cLOR <sub>34</sub> | 0.849 (0.019)                      | 0.835 (0.019) | 0.824 (0.018) | 0.533 (0.012) | 0.560 (0.013) | 3.4                              | 6.2   | 153.6 | 129.6 |
| cLOR <sub>35</sub> | 0.852 (0.019)                      | 0.833 (0.019) | 0.823 (0.018) | 0.529 (0.012) | 0.556 (0.012) | 4.6                              | 7.1   | 159.3 | 134.6 |
| cLOR <sub>45</sub> | 0.304 (0.007)                      | 0.282 (0.006) | 0.282 (0.006) | 0.193 (0.004) | 0.206 (0.005) | 15.9                             | 15.9  | 148.6 | 118.6 |
| $\mu_1$            | 0.125 (0.003)                      | 0.124 (0.003) | 0.124 (0.003) | 0.085 (0.002) | 0.091 (0.002) | 2.0                              | 2.5   | 117.1 | 92.0  |
| $\mu_2$            | 0.533 (0.012)                      | 0.513 (0.011) | 0.517 (0.012) | 0.429 (0.010) | 0.428 (0.010) | 8.0                              | 6.6   | 54.8  | 54.9  |
| $\mu_3$            | 0.828 (0.019)                      | 0.817 (0.018) | 0.806 (0.018) | 0.518 (0.012) | 0.542 (0.012) | 2.7                              | 5.5   | 155.7 | 132.9 |
| $\mu_4$            | 0.202 (0.005)                      | 0.196 (0.004) | 0.196 (0.004) | 0.129 (0.003) | 0.140 (0.003) | 6.4                              | 6.5   | 143.6 | 107.6 |
| $\mu_5$            | 0.217 (0.005)                      | 0.206 (0.005) | 0.205 (0.005) | 0.146 (0.003) | 0.154 (0.003) | 11.3                             | 11.3  | 121.8 | 97.3  |
| $p_1$              | 0.014 (0.000)                      | 0.014 (0.000) | 0.013 (0.000) | 0.010 (0.000) | 0.010 (0.000) | 2.8                              | 3.4   | 96.3  | 91.9  |
| $p_2$              | 0.037 (0.001)                      | 0.033 (0.001) | 0.034 (0.001) | 0.033 (0.001) | 0.026 (0.001) | 23.2                             | 19.3  | 22.7  | 100.6 |
| $p_3$              | 0.070 (0.002)                      | 0.069 (0.002) | 0.071 (0.002) | 0.055 (0.001) | 0.048 (0.001) | 2.8                              | -1.8  | 64.3  | 112.9 |
| $p_4$              | 0.021 (0.000)                      | 0.020 (0.000) | 0.020 (0.000) | 0.015 (0.000) | 0.015 (0.000) | 9.3                              | 9.5   | 108.4 | 110.1 |
| $p_5$              | 0.032 (0.001)                      | 0.030 (0.001) | 0.030 (0.001) | 0.023 (0.001) | 0.023 (0.001) | 14.6                             | 15.0  | 94.2  | 100.7 |
| $\delta_1$         | 0.133 (0.003)                      | 0.110 (0.002) | 0.095 (0.002) | 0.130 (0.003) | 0.108 (0.002) | 45.2                             | 96.5  | 4.2   | 50.4  |
| $\delta_2$         | 0.632 (0.014)                      | 0.505 (0.011) | 0.502 (0.011) | 0.588 (0.013) | 0.459 (0.010) | 56.4                             | 58.7  | 15.3  | 89.2  |
| $\delta_3$         | 0.703 (0.016)                      | 0.673 (0.015) | 0.653 (0.015) | 0.674 (0.015) | 0.549 (0.012) | 9.2                              | 15.8  | 8.7   | 64.1  |
| $\delta_4$         | 0.234 (0.005)                      | 0.143 (0.003) | 0.130 (0.003) | 0.200 (0.004) | 0.131 (0.003) | 168.9                            | 223.5 | 37.5  | 219.0 |
| $\delta_5$         | 0.309 (0.007)                      | 0.176 (0.004) | 0.164 (0.004) | 0.244 (0.005) | 0.154 (0.003) | 209.7                            | 254.1 | 60.7  | 302.9 |
| $\rho$             | 0.209 (0.005)                      | 0.208 (0.005) | 0.210 (0.005) | 0.213 (0.005) | 0.211 (0.005) | 0.8                              | -1.2  | -3.7  | -1.5  |

TABLE C26

*Simulation results comparing data generated under the EM-EV scenario with MAR missingness of treatment arms. The Empse and the Monte Carlo standard error of the posterior median are rounded to 3 decimal places for the five methods (NB, CPV, FBV, CPM, and DCP). The relative percent increase in precision when comparing four methods (CPV, FBV, CPM, and DCP) versus NB is also summarized.*

| Parameter          | Empse (Monte Carlo standard error) |               |               |               |               | Relative % increase in precision |       |       |       |
|--------------------|------------------------------------|---------------|---------------|---------------|---------------|----------------------------------|-------|-------|-------|
|                    | NB                                 | CPV           | FBV           | CPM           | DCP           | CPV                              | FBV   | CPM   | DCP   |
| cLOR <sub>12</sub> | 0.594 (0.013)                      | 0.527 (0.012) | 0.544 (0.012) | 0.464 (0.010) | 0.452 (0.010) | 26.9                             | 19.3  | 64.2  | 72.8  |
| cLOR <sub>13</sub> | 0.779 (0.017)                      | 0.768 (0.017) | 0.749 (0.017) | 0.505 (0.011) | 0.519 (0.012) | 2.8                              | 8.2   | 137.6 | 124.9 |
| cLOR <sub>14</sub> | 0.215 (0.005)                      | 0.212 (0.005) | 0.212 (0.005) | 0.150 (0.003) | 0.160 (0.004) | 3.4                              | 3.4   | 107.0 | 80.3  |
| cLOR <sub>15</sub> | 0.283 (0.006)                      | 0.240 (0.005) | 0.240 (0.005) | 0.169 (0.004) | 0.175 (0.004) | 38.9                             | 38.6  | 181.4 | 161.2 |
| cLOR <sub>23</sub> | 0.949 (0.021)                      | 0.907 (0.020) | 0.902 (0.020) | 0.664 (0.015) | 0.670 (0.015) | 9.5                              | 10.7  | 104.6 | 101.1 |
| cLOR <sub>24</sub> | 0.645 (0.014)                      | 0.567 (0.013) | 0.584 (0.013) | 0.476 (0.011) | 0.467 (0.010) | 29.2                             | 21.9  | 83.7  | 90.3  |
| cLOR <sub>25</sub> | 0.715 (0.016)                      | 0.593 (0.013) | 0.611 (0.014) | 0.489 (0.011) | 0.476 (0.011) | 45.5                             | 36.8  | 113.6 | 125.6 |
| cLOR <sub>34</sub> | 0.819 (0.018)                      | 0.804 (0.018) | 0.786 (0.018) | 0.524 (0.012) | 0.541 (0.012) | 3.7                              | 8.4   | 144.6 | 128.7 |
| cLOR <sub>35</sub> | 0.839 (0.019)                      | 0.803 (0.018) | 0.783 (0.018) | 0.519 (0.012) | 0.535 (0.012) | 9.2                              | 14.8  | 162.0 | 146.1 |
| cLOR <sub>45</sub> | 0.317 (0.007)                      | 0.287 (0.006) | 0.288 (0.006) | 0.196 (0.004) | 0.211 (0.005) | 21.6                             | 21.5  | 161.1 | 126.6 |
| $\mu_1$            | 0.125 (0.003)                      | 0.124 (0.003) | 0.124 (0.003) | 0.085 (0.002) | 0.091 (0.002) | 2.0                              | 2.5   | 118.9 | 91.7  |
| $\mu_2$            | 0.609 (0.014)                      | 0.543 (0.012) | 0.558 (0.012) | 0.465 (0.010) | 0.455 (0.010) | 25.9                             | 19.0  | 71.8  | 78.9  |
| $\mu_3$            | 0.789 (0.018)                      | 0.777 (0.017) | 0.758 (0.017) | 0.501 (0.011) | 0.518 (0.012) | 2.9                              | 8.3   | 147.5 | 132.2 |
| $\mu_4$            | 0.201 (0.004)                      | 0.198 (0.004) | 0.198 (0.004) | 0.131 (0.003) | 0.145 (0.003) | 3.1                              | 2.6   | 133.2 | 92.3  |
| $\mu_5$            | 0.268 (0.006)                      | 0.221 (0.005) | 0.222 (0.005) | 0.149 (0.003) | 0.158 (0.004) | 46.9                             | 45.8  | 221.9 | 187.6 |
| $p_1$              | 0.014 (0.000)                      | 0.014 (0.000) | 0.013 (0.000) | 0.010 (0.000) | 0.010 (0.000) | 2.5                              | 3.1   | 98.6  | 90.3  |
| $p_2$              | 0.030 (0.001)                      | 0.030 (0.001) | 0.030 (0.001) | 0.027 (0.001) | 0.024 (0.001) | -3.1                             | -1.3  | 17.9  | 58.0  |
| $p_3$              | 0.065 (0.001)                      | 0.065 (0.001) | 0.066 (0.001) | 0.054 (0.001) | 0.046 (0.001) | 2.3                              | -2.2  | 48.3  | 99.8  |
| $p_4$              | 0.024 (0.001)                      | 0.020 (0.000) | 0.020 (0.000) | 0.016 (0.000) | 0.015 (0.000) | 41.1                             | 40.0  | 129.2 | 162.8 |
| $p_5$              | 0.050 (0.001)                      | 0.033 (0.001) | 0.033 (0.001) | 0.026 (0.001) | 0.023 (0.001) | 126.1                            | 123.5 | 271.8 | 361.9 |
| $\delta_1$         | 0.130 (0.003)                      | 0.110 (0.002) | 0.095 (0.002) | 0.129 (0.003) | 0.109 (0.002) | 38.7                             | 88.0  | 1.1   | 41.5  |
| $\delta_2$         | 0.622 (0.014)                      | 0.475 (0.011) | 0.480 (0.011) | 0.546 (0.012) | 0.438 (0.010) | 71.4                             | 68.3  | 29.8  | 101.5 |
| $\delta_3$         | 0.694 (0.016)                      | 0.656 (0.015) | 0.631 (0.014) | 0.668 (0.015) | 0.528 (0.012) | 11.9                             | 21.1  | 8.0   | 73.2  |
| $\delta_4$         | 0.275 (0.006)                      | 0.144 (0.003) | 0.133 (0.003) | 0.225 (0.005) | 0.130 (0.003) | 263.0                            | 329.3 | 49.4  | 346.6 |
| $\delta_5$         | 0.325 (0.007)                      | 0.173 (0.004) | 0.163 (0.004) | 0.233 (0.005) | 0.147 (0.003) | 252.1                            | 298.2 | 94.0  | 390.2 |
| $\rho$             | 0.187 (0.004)                      | 0.176 (0.004) | 0.181 (0.004) | 0.199 (0.004) | 0.187 (0.004) | 12.8                             | 6.1   | -12.4 | 0.1   |

TABLE C27

*Simulation results comparing data generated under the UM-EV scenario with MCAR missingness of treatment arms. The Empse and the Monte Carlo standard error of the posterior median are rounded to 3 decimal places for the five methods (NB, CPV, FBV, CPM, and DCP). The relative percent increase in precision when comparing four methods (CPV, FBV, CPM, and DCP) versus NB is also summarized.*

| Parameter          | Empse (Monte Carlo standard error) |               |               |               |               | Relative % increase in precision |       |       |       |
|--------------------|------------------------------------|---------------|---------------|---------------|---------------|----------------------------------|-------|-------|-------|
|                    | NB                                 | CPV           | FBV           | CPM           | DCP           | CPV                              | FBV   | CPM   | DCP   |
| cLOR <sub>12</sub> | 0.519 (0.012)                      | 0.495 (0.011) | 0.496 (0.011) | 0.411 (0.009) | 0.406 (0.009) | 10.2                             | 9.8   | 60.0  | 63.8  |
| cLOR <sub>13</sub> | 0.813 (0.018)                      | 0.797 (0.018) | 0.787 (0.018) | 0.505 (0.011) | 0.527 (0.012) | 4.2                              | 6.7   | 159.1 | 138.4 |
| cLOR <sub>14</sub> | 0.215 (0.005)                      | 0.208 (0.005) | 0.208 (0.005) | 0.210 (0.005) | 0.211 (0.005) | 6.9                              | 7.2   | 4.7   | 4.1   |
| cLOR <sub>15</sub> | 0.234 (0.005)                      | 0.224 (0.005) | 0.223 (0.005) | 0.214 (0.005) | 0.216 (0.005) | 9.8                              | 10.3  | 20.1  | 17.7  |
| cLOR <sub>23</sub> | 0.995 (0.022)                      | 0.963 (0.022) | 0.952 (0.021) | 0.658 (0.015) | 0.673 (0.015) | 6.9                              | 9.2   | 128.9 | 118.9 |
| cLOR <sub>24</sub> | 0.568 (0.013)                      | 0.539 (0.012) | 0.541 (0.012) | 0.449 (0.010) | 0.449 (0.010) | 10.8                             | 10.2  | 59.9  | 59.9  |
| cLOR <sub>25</sub> | 0.589 (0.013)                      | 0.555 (0.012) | 0.556 (0.012) | 0.455 (0.010) | 0.457 (0.010) | 13.0                             | 12.4  | 67.8  | 66.0  |
| cLOR <sub>34</sub> | 0.849 (0.019)                      | 0.829 (0.019) | 0.819 (0.018) | 0.529 (0.012) | 0.558 (0.012) | 4.9                              | 7.5   | 157.7 | 131.6 |
| cLOR <sub>35</sub> | 0.852 (0.019)                      | 0.828 (0.019) | 0.819 (0.018) | 0.522 (0.012) | 0.551 (0.012) | 5.9                              | 8.3   | 166.5 | 139.4 |
| cLOR <sub>45</sub> | 0.304 (0.007)                      | 0.283 (0.006) | 0.283 (0.006) | 0.266 (0.006) | 0.275 (0.006) | 15.0                             | 14.9  | 30.5  | 21.7  |
| $\mu_1$            | 0.125 (0.003)                      | 0.124 (0.003) | 0.123 (0.003) | 0.120 (0.003) | 0.120 (0.003) | 2.3                              | 3.3   | 9.1   | 8.8   |
| $\mu_2$            | 0.533 (0.012)                      | 0.508 (0.011) | 0.509 (0.011) | 0.415 (0.009) | 0.411 (0.009) | 10.1                             | 9.6   | 64.7  | 67.9  |
| $\mu_3$            | 0.828 (0.019)                      | 0.811 (0.018) | 0.801 (0.018) | 0.500 (0.011) | 0.528 (0.012) | 4.2                              | 6.8   | 173.7 | 145.7 |
| $\mu_4$            | 0.202 (0.005)                      | 0.196 (0.004) | 0.196 (0.004) | 0.200 (0.004) | 0.202 (0.005) | 5.8                              | 5.8   | 2.0   | -0.4  |
| $\mu_5$            | 0.217 (0.005)                      | 0.206 (0.005) | 0.206 (0.005) | 0.197 (0.004) | 0.200 (0.004) | 10.6                             | 10.7  | 21.1  | 17.4  |
| $p_1$              | 0.014 (0.000)                      | 0.014 (0.000) | 0.013 (0.000) | 0.013 (0.000) | 0.013 (0.000) | 2.8                              | 3.9   | 3.7   | 6.0   |
| $p_2$              | 0.037 (0.001)                      | 0.033 (0.001) | 0.033 (0.001) | 0.039 (0.001) | 0.029 (0.001) | 27.2                             | 22.7  | -12.7 | 60.2  |
| $p_3$              | 0.070 (0.002)                      | 0.069 (0.002) | 0.071 (0.002) | 0.063 (0.001) | 0.053 (0.001) | 4.1                              | -1.5  | 24.0  | 75.6  |
| $p_4$              | 0.021 (0.000)                      | 0.020 (0.000) | 0.020 (0.000) | 0.019 (0.000) | 0.020 (0.000) | 9.0                              | 9.0   | 26.2  | 13.5  |
| $p_5$              | 0.032 (0.001)                      | 0.030 (0.001) | 0.030 (0.001) | 0.027 (0.001) | 0.028 (0.001) | 13.6                             | 14.2  | 48.5  | 30.8  |
| $\delta_1$         | 0.133 (0.003)                      | 0.112 (0.003) | 0.088 (0.002) | 0.133 (0.003) | 0.112 (0.003) | 39.7                             | 129.1 | 0.3   | 40.7  |
| $\delta_2$         | 0.632 (0.014)                      | 0.474 (0.011) | 0.458 (0.010) | 0.586 (0.013) | 0.434 (0.010) | 77.6                             | 90.2  | 16.4  | 112.5 |
| $\delta_3$         | 0.701 (0.016)                      | 0.634 (0.014) | 0.611 (0.014) | 0.696 (0.016) | 0.520 (0.012) | 22.1                             | 31.6  | 1.4   | 82.1  |
| $\delta_4$         | 0.234 (0.005)                      | 0.149 (0.003) | 0.138 (0.003) | 0.224 (0.005) | 0.150 (0.003) | 148.8                            | 189.5 | 8.9   | 143.7 |
| $\delta_5$         | 0.308 (0.007)                      | 0.181 (0.004) | 0.172 (0.004) | 0.266 (0.006) | 0.173 (0.004) | 189.6                            | 222.1 | 33.9  | 218.3 |
| $\rho$             | 0.209 (0.005)                      | 0.208 (0.005) | 0.209 (0.005) | 0.216 (0.005) | 0.213 (0.005) | 1.4                              | 0.2   | -5.7  | -3.3  |



TABLE C28

*Simulation results comparing data generated under the UM-EV scenario with MAR missingness of treatment arms. The Empse and the Monte Carlo standard error of the posterior median are rounded to 3 decimal places for the five methods (NB, CPV, FBV, CPM, and DCP). The relative percent increase in precision when comparing four methods (CPV, FBV, CPM, and DCP) versus NB is also summarized.*

| Parameter          | Empse (Monte Carlo standard error) |               |               |               |               | Relative % increase in precision |       |       |       |
|--------------------|------------------------------------|---------------|---------------|---------------|---------------|----------------------------------|-------|-------|-------|
|                    | NB                                 | CPV           | FBV           | CPM           | DCP           | CPV                              | FBV   | CPM   | DCP   |
| cLOR <sub>12</sub> | 0.594 (0.013)                      | 0.520 (0.012) | 0.533 (0.012) | 0.418 (0.009) | 0.409 (0.009) | 30.1                             | 23.8  | 102.1 | 111.2 |
| cLOR <sub>13</sub> | 0.778 (0.017)                      | 0.766 (0.017) | 0.749 (0.017) | 0.507 (0.011) | 0.517 (0.012) | 3.2                              | 8.0   | 135.7 | 126.8 |
| cLOR <sub>14</sub> | 0.215 (0.005)                      | 0.212 (0.005) | 0.212 (0.005) | 0.206 (0.005) | 0.210 (0.005) | 3.3                              | 3.1   | 8.9   | 5.3   |
| cLOR <sub>15</sub> | 0.283 (0.006)                      | 0.241 (0.005) | 0.241 (0.005) | 0.216 (0.005) | 0.215 (0.005) | 37.8                             | 37.9  | 72.0  | 73.1  |
| cLOR <sub>23</sub> | 0.949 (0.021)                      | 0.902 (0.020) | 0.899 (0.020) | 0.636 (0.014) | 0.643 (0.014) | 10.6                             | 11.4  | 122.3 | 117.4 |
| cLOR <sub>24</sub> | 0.644 (0.014)                      | 0.562 (0.013) | 0.576 (0.013) | 0.455 (0.010) | 0.448 (0.010) | 31.0                             | 24.7  | 99.7  | 106.4 |
| cLOR <sub>25</sub> | 0.714 (0.016)                      | 0.591 (0.013) | 0.607 (0.014) | 0.471 (0.011) | 0.455 (0.010) | 46.2                             | 38.3  | 129.8 | 146.0 |
| cLOR <sub>34</sub> | 0.819 (0.018)                      | 0.803 (0.018) | 0.787 (0.018) | 0.536 (0.012) | 0.550 (0.012) | 4.0                              | 8.2   | 132.8 | 121.6 |
| cLOR <sub>35</sub> | 0.839 (0.019)                      | 0.802 (0.018) | 0.784 (0.018) | 0.529 (0.012) | 0.542 (0.012) | 9.6                              | 14.5  | 151.5 | 139.7 |
| cLOR <sub>45</sub> | 0.317 (0.007)                      | 0.288 (0.006) | 0.288 (0.006) | 0.255 (0.006) | 0.265 (0.006) | 21.1                             | 21.3  | 55.6  | 43.9  |
| $\mu_1$            | 0.126 (0.003)                      | 0.124 (0.003) | 0.123 (0.003) | 0.121 (0.003) | 0.121 (0.003) | 2.4                              | 3.4   | 6.9   | 7.6   |
| $\mu_2$            | 0.609 (0.014)                      | 0.536 (0.012) | 0.548 (0.012) | 0.425 (0.010) | 0.417 (0.009) | 29.2                             | 23.6  | 105.2 | 113.5 |
| $\mu_3$            | 0.789 (0.018)                      | 0.776 (0.017) | 0.758 (0.017) | 0.501 (0.011) | 0.514 (0.012) | 3.3                              | 8.2   | 147.3 | 135.0 |
| $\mu_4$            | 0.201 (0.004)                      | 0.198 (0.004) | 0.199 (0.004) | 0.196 (0.004) | 0.199 (0.004) | 2.7                              | 2.1   | 4.3   | 1.3   |
| $\mu_5$            | 0.268 (0.006)                      | 0.222 (0.005) | 0.223 (0.005) | 0.195 (0.004) | 0.195 (0.004) | 45.4                             | 44.1  | 89.7  | 89.6  |
| $p_1$              | 0.014 (0.000)                      | 0.014 (0.000) | 0.013 (0.000) | 0.014 (0.000) | 0.013 (0.000) | 2.6                              | 3.6   | 0.6   | 3.4   |
| $p_2$              | 0.030 (0.001)                      | 0.030 (0.001) | 0.030 (0.001) | 0.034 (0.001) | 0.028 (0.001) | -3.2                             | -1.6  | -23.2 | 13.9  |
| $p_3$              | 0.065 (0.001)                      | 0.064 (0.001) | 0.066 (0.001) | 0.061 (0.001) | 0.051 (0.001) | 3.4                              | -1.3  | 14.1  | 65.8  |
| $p_4$              | 0.024 (0.001)                      | 0.021 (0.000) | 0.021 (0.000) | 0.019 (0.000) | 0.019 (0.000) | 39.1                             | 37.5  | 60.9  | 54.6  |
| $p_5$              | 0.050 (0.001)                      | 0.034 (0.001) | 0.034 (0.001) | 0.028 (0.001) | 0.027 (0.001) | 121.3                            | 117.6 | 211.6 | 240.5 |
| $\delta_1$         | 0.130 (0.003)                      | 0.112 (0.003) | 0.088 (0.002) | 0.133 (0.003) | 0.115 (0.003) | 33.7                             | 119.1 | -5.3  | 27.3  |
| $\delta_2$         | 0.622 (0.014)                      | 0.452 (0.010) | 0.447 (0.010) | 0.523 (0.012) | 0.405 (0.009) | 89.9                             | 93.3  | 41.7  | 136.0 |
| $\delta_3$         | 0.695 (0.016)                      | 0.637 (0.014) | 0.600 (0.013) | 0.671 (0.015) | 0.512 (0.011) | 19.1                             | 33.9  | 7.3   | 84.1  |
| $\delta_4$         | 0.275 (0.006)                      | 0.151 (0.003) | 0.141 (0.003) | 0.230 (0.005) | 0.147 (0.003) | 232.3                            | 278.6 | 43.0  | 250.9 |
| $\delta_5$         | 0.326 (0.007)                      | 0.178 (0.004) | 0.171 (0.004) | 0.246 (0.005) | 0.162 (0.004) | 232.8                            | 263.0 | 75.5  | 306.1 |
| $\rho$             | 0.187 (0.004)                      | 0.176 (0.004) | 0.181 (0.004) | 0.201 (0.004) | 0.177 (0.004) | 12.2                             | 6.2   | -13.8 | 11.6  |

TABLE C29

*Simulation results comparing data generated under the EM-UV scenario with MCAR missingness of treatment arms. The Empse and the Monte Carlo standard error of the posterior median are rounded to 3 decimal places for the five methods (NB, CPV, FBV, CPM, and DCP). The relative percent increase in precision when comparing four methods (CPV, FBV, CPM, and DCP) versus NB is also summarized.*

| Parameter          | Empse (Monte Carlo standard error) |               |               |               |               | Relative % increase in precision |       |       |       |
|--------------------|------------------------------------|---------------|---------------|---------------|---------------|----------------------------------|-------|-------|-------|
|                    | NB                                 | CPV           | FBV           | CPM           | DCP           | CPV                              | FBV   | CPM   | DCP   |
| cLOR <sub>12</sub> | 0.519 (0.012)                      | 0.485 (0.011) | 0.478 (0.011) | 0.373 (0.008) | 0.390 (0.009) | 14.4                             | 17.9  | 93.7  | 77.6  |
| cLOR <sub>13</sub> | 0.812 (0.018)                      | 0.772 (0.017) | 0.753 (0.017) | 0.342 (0.008) | 0.514 (0.012) | 10.6                             | 16.2  | 463.6 | 149.4 |
| cLOR <sub>14</sub> | 0.215 (0.005)                      | 0.215 (0.005) | 0.221 (0.005) | 0.203 (0.005) | 0.203 (0.005) | 0.7                              | -5.3  | 12.7  | 13.0  |
| cLOR <sub>15</sub> | 0.234 (0.005)                      | 0.231 (0.005) | 0.240 (0.005) | 0.229 (0.005) | 0.222 (0.005) | 3.3                              | -4.4  | 4.9   | 11.6  |
| cLOR <sub>23</sub> | 0.994 (0.022)                      | 0.931 (0.021) | 0.908 (0.020) | 0.498 (0.011) | 0.636 (0.014) | 14.0                             | 19.9  | 298.0 | 144.3 |
| cLOR <sub>24</sub> | 0.567 (0.013)                      | 0.534 (0.012) | 0.530 (0.012) | 0.410 (0.009) | 0.428 (0.010) | 12.7                             | 14.6  | 91.8  | 76.0  |
| cLOR <sub>25</sub> | 0.589 (0.013)                      | 0.551 (0.012) | 0.544 (0.012) | 0.431 (0.010) | 0.445 (0.010) | 14.5                             | 17.5  | 87.1  | 75.6  |
| cLOR <sub>34</sub> | 0.848 (0.019)                      | 0.806 (0.018) | 0.787 (0.018) | 0.381 (0.009) | 0.538 (0.012) | 10.7                             | 16.0  | 394.2 | 148.5 |
| cLOR <sub>35</sub> | 0.851 (0.019)                      | 0.806 (0.018) | 0.788 (0.018) | 0.383 (0.009) | 0.537 (0.012) | 11.7                             | 16.8  | 394.7 | 151.3 |
| cLOR <sub>45</sub> | 0.304 (0.007)                      | 0.297 (0.007) | 0.306 (0.007) | 0.285 (0.006) | 0.277 (0.006) | 5.0                              | -1.4  | 14.2  | 20.3  |
| $\mu_1$            | 0.125 (0.003)                      | 0.126 (0.003) | 0.130 (0.003) | 0.119 (0.003) | 0.119 (0.003) | -0.4                             | -6.7  | 11.3  | 10.2  |
| $\mu_2$            | 0.533 (0.012)                      | 0.498 (0.011) | 0.491 (0.011) | 0.371 (0.008) | 0.390 (0.009) | 14.4                             | 17.8  | 106.6 | 86.9  |
| $\mu_3$            | 0.826 (0.018)                      | 0.786 (0.018) | 0.767 (0.017) | 0.329 (0.007) | 0.514 (0.012) | 10.4                             | 15.9  | 529.8 | 158.0 |
| $\mu_4$            | 0.202 (0.005)                      | 0.201 (0.005) | 0.206 (0.005) | 0.190 (0.004) | 0.189 (0.004) | 0.6                              | -4.2  | 12.8  | 13.7  |
| $\mu_5$            | 0.217 (0.005)                      | 0.212 (0.005) | 0.218 (0.005) | 0.208 (0.005) | 0.200 (0.004) | 4.2                              | -1.0  | 8.2   | 17.2  |
| $p_1$              | 0.014 (0.000)                      | 0.014 (0.000) | 0.018 (0.000) | 0.013 (0.000) | 0.013 (0.000) | -0.5                             | -39.3 | 10.2  | 9.3   |
| $p_2$              | 0.037 (0.001)                      | 0.033 (0.001) | 0.037 (0.001) | 0.030 (0.001) | 0.025 (0.001) | 24.4                             | -3.2  | 47.6  | 118.0 |
| $p_3$              | 0.070 (0.002)                      | 0.067 (0.001) | 0.067 (0.002) | 0.046 (0.001) | 0.048 (0.001) | 9.1                              | 8.2   | 135.7 | 112.9 |
| $p_4$              | 0.021 (0.000)                      | 0.021 (0.000) | 0.025 (0.001) | 0.020 (0.000) | 0.020 (0.000) | 1.0                              | -29.5 | 8.8   | 13.2  |
| $p_5$              | 0.032 (0.001)                      | 0.031 (0.001) | 0.035 (0.001) | 0.031 (0.001) | 0.030 (0.001) | 7.4                              | -12.6 | 6.6   | 20.2  |
| $\delta_1$         | 0.133 (0.003)                      | 0.136 (0.003) | 0.212 (0.005) | 0.132 (0.003) | 0.135 (0.003) | -4.9                             | -60.7 | 0.9   | -2.6  |
| $\delta_2$         | 0.632 (0.014)                      | 0.490 (0.011) | 0.552 (0.012) | 0.577 (0.013) | 0.452 (0.010) | 66.7                             | 31.1  | 19.9  | 95.3  |
| $\delta_3$         | 0.701 (0.016)                      | 0.607 (0.014) | 0.523 (0.012) | 0.672 (0.015) | 0.459 (0.010) | 33.5                             | 79.5  | 8.7   | 133.2 |
| $\delta_4$         | 0.234 (0.005)                      | 0.208 (0.005) | 0.310 (0.007) | 0.215 (0.005) | 0.195 (0.004) | 26.9                             | -42.8 | 18.2  | 44.8  |
| $\delta_5$         | 0.309 (0.007)                      | 0.253 (0.006) | 0.370 (0.008) | 0.276 (0.006) | 0.232 (0.005) | 48.4                             | -30.3 | 25.2  | 77.3  |
| $\rho$             | 0.209 (0.005)                      | 0.214 (0.005) | 0.209 (0.005) | 0.215 (0.005) | 0.217 (0.005) | -4.3                             | 0.5   | -5.2  | -7.0  |

TABLE C30

*Simulation results comparing data generated under the EM-UV scenario with MAR missingness of treatment arms. The Empse and the Monte Carlo standard error of the posterior median are rounded to 3 decimal places for the five methods (NB, CPV, FBV, CPM, and DCP). The relative percent increase in precision when comparing four methods (CPV, FBV, CPM, and DCP) versus NB is also summarized.*

| Parameter          | Empse (Monte Carlo standard error) |               |               |               |               | Relative % increase in precision |       |       |       |
|--------------------|------------------------------------|---------------|---------------|---------------|---------------|----------------------------------|-------|-------|-------|
|                    | NB                                 | CPV           | FBV           | CPM           | DCP           | CPV                              | FBV   | CPM   | DCP   |
| cLOR <sub>12</sub> | 0.593 (0.013)                      | 0.510 (0.011) | 0.486 (0.011) | 0.398 (0.009) | 0.409 (0.009) | 35.1                             | 48.7  | 121.8 | 110.0 |
| cLOR <sub>13</sub> | 0.778 (0.017)                      | 0.748 (0.017) | 0.716 (0.016) | 0.348 (0.008) | 0.486 (0.011) | 8.4                              | 18.1  | 400.5 | 156.8 |
| cLOR <sub>14</sub> | 0.215 (0.005)                      | 0.215 (0.005) | 0.220 (0.005) | 0.203 (0.005) | 0.201 (0.005) | 0.6                              | -3.9  | 11.9  | 14.2  |
| cLOR <sub>15</sub> | 0.283 (0.006)                      | 0.259 (0.006) | 0.282 (0.006) | 0.252 (0.006) | 0.242 (0.005) | 19.8                             | 0.6   | 26.2  | 36.6  |
| cLOR <sub>23</sub> | 0.948 (0.021)                      | 0.880 (0.020) | 0.840 (0.019) | 0.514 (0.012) | 0.612 (0.014) | 15.9                             | 27.2  | 239.3 | 139.8 |
| cLOR <sub>24</sub> | 0.643 (0.014)                      | 0.559 (0.013) | 0.540 (0.012) | 0.434 (0.010) | 0.446 (0.010) | 32.3                             | 42.1  | 119.4 | 107.8 |
| cLOR <sub>25</sub> | 0.714 (0.016)                      | 0.602 (0.013) | 0.591 (0.013) | 0.463 (0.010) | 0.469 (0.011) | 40.6                             | 45.8  | 137.9 | 131.1 |
| cLOR <sub>34</sub> | 0.818 (0.018)                      | 0.788 (0.018) | 0.759 (0.017) | 0.390 (0.009) | 0.522 (0.012) | 7.7                              | 16.1  | 339.4 | 145.7 |
| cLOR <sub>35</sub> | 0.839 (0.019)                      | 0.798 (0.018) | 0.771 (0.017) | 0.408 (0.009) | 0.528 (0.012) | 10.5                             | 18.5  | 323.2 | 152.3 |
| cLOR <sub>45</sub> | 0.317 (0.007)                      | 0.300 (0.007) | 0.315 (0.007) | 0.281 (0.006) | 0.273 (0.006) | 11.6                             | 1.2   | 27.6  | 35.0  |
| $\mu_1$            | 0.126 (0.003)                      | 0.126 (0.003) | 0.130 (0.003) | 0.119 (0.003) | 0.119 (0.003) | -0.3                             | -6.5  | 11.0  | 10.4  |
| $\mu_2$            | 0.608 (0.014)                      | 0.525 (0.012) | 0.503 (0.011) | 0.394 (0.009) | 0.410 (0.009) | 34.0                             | 46.3  | 138.1 | 120.0 |
| $\mu_3$            | 0.789 (0.018)                      | 0.757 (0.017) | 0.725 (0.016) | 0.332 (0.007) | 0.484 (0.011) | 8.5                              | 18.2  | 463.8 | 165.3 |
| $\mu_4$            | 0.201 (0.004)                      | 0.200 (0.004) | 0.205 (0.005) | 0.190 (0.004) | 0.187 (0.004) | 0.2                              | -4.0  | 11.3  | 15.5  |
| $\mu_5$            | 0.268 (0.006)                      | 0.241 (0.005) | 0.264 (0.006) | 0.233 (0.005) | 0.220 (0.005) | 23.7                             | 3.3   | 32.9  | 49.1  |
| $p_1$              | 0.014 (0.000)                      | 0.014 (0.000) | 0.018 (0.000) | 0.013 (0.000) | 0.013 (0.000) | -0.4                             | -39.8 | 8.8   | 9.8   |
| $p_2$              | 0.030 (0.001)                      | 0.030 (0.001) | 0.034 (0.001) | 0.025 (0.001) | 0.023 (0.001) | -4.2                             | -22.5 | 38.7  | 69.4  |
| $p_3$              | 0.065 (0.001)                      | 0.062 (0.001) | 0.062 (0.001) | 0.046 (0.001) | 0.045 (0.001) | 9.6                              | 9.5   | 99.8  | 113.8 |
| $p_4$              | 0.024 (0.001)                      | 0.022 (0.000) | 0.028 (0.001) | 0.023 (0.001) | 0.021 (0.000) | 19.4                             | -23.5 | 7.2   | 33.2  |
| $p_5$              | 0.050 (0.001)                      | 0.041 (0.001) | 0.050 (0.001) | 0.041 (0.001) | 0.036 (0.001) | 50.0                             | -1.1  | 48.3  | 90.1  |
| $\delta_1$         | 0.130 (0.003)                      | 0.134 (0.003) | 0.213 (0.005) | 0.131 (0.003) | 0.133 (0.003) | -6.6                             | -62.8 | -1.5  | -5.0  |
| $\delta_2$         | 0.621 (0.014)                      | 0.460 (0.010) | 0.509 (0.011) | 0.528 (0.012) | 0.424 (0.009) | 82.2                             | 49.2  | 38.6  | 114.4 |
| $\delta_3$         | 0.694 (0.016)                      | 0.632 (0.014) | 0.505 (0.011) | 0.679 (0.015) | 0.478 (0.011) | 20.5                             | 89.1  | 4.4   | 110.6 |
| $\delta_4$         | 0.275 (0.006)                      | 0.224 (0.005) | 0.326 (0.007) | 0.252 (0.006) | 0.212 (0.005) | 50.5                             | -28.9 | 19.6  | 68.8  |
| $\delta_5$         | 0.325 (0.007)                      | 0.255 (0.006) | 0.380 (0.008) | 0.263 (0.006) | 0.224 (0.005) | 62.2                             | -26.6 | 52.5  | 110.5 |
| $\rho$             | 0.186 (0.004)                      | 0.184 (0.004) | 0.195 (0.004) | 0.198 (0.004) | 0.190 (0.004) | 3.0                              | -8.7  | -11.4 | -4.1  |

TABLE C31

Simulation results comparing data generated under the UM-UV scenario with MCAR missingness of treatment arms. The Empse and the Monte Carlo standard error of the posterior median are rounded to 3 decimal places for the five methods (NB, CPV, FBV, CPM, and DCP). The relative percent increase in precision when comparing four methods (CPV, FBV, CPM, and DCP) versus NB is also summarized.

| Parameter          | Empse (Monte Carlo standard error) |               |               |               |               | Relative % increase in precision |       |       |       |
|--------------------|------------------------------------|---------------|---------------|---------------|---------------|----------------------------------|-------|-------|-------|
|                    | NB                                 | CPV           | FBV           | CPM           | DCP           | CPV                              | FBV   | CPM   | DCP   |
| cLOR <sub>12</sub> | 0.519 (0.012)                      | 0.477 (0.011) | 0.466 (0.010) | 0.346 (0.008) | 0.366 (0.008) | 18.7                             | 24.0  | 125.1 | 101.1 |
| cLOR <sub>13</sub> | 0.812 (0.018)                      | 0.771 (0.017) | 0.751 (0.017) | 0.325 (0.007) | 0.526 (0.012) | 11.1                             | 16.8  | 523.7 | 138.6 |
| cLOR <sub>14</sub> | 0.215 (0.005)                      | 0.213 (0.005) | 0.216 (0.005) | 0.212 (0.005) | 0.208 (0.005) | 2.2                              | -0.7  | 2.8   | 6.8   |
| cLOR <sub>15</sub> | 0.234 (0.005)                      | 0.231 (0.005) | 0.240 (0.005) | 0.231 (0.005) | 0.225 (0.005) | 2.6                              | -4.3  | 3.4   | 8.5   |
| cLOR <sub>23</sub> | 0.995 (0.022)                      | 0.926 (0.021) | 0.901 (0.020) | 0.469 (0.010) | 0.642 (0.014) | 15.3                             | 22.0  | 350.1 | 139.9 |
| cLOR <sub>24</sub> | 0.568 (0.013)                      | 0.524 (0.012) | 0.513 (0.011) | 0.388 (0.009) | 0.408 (0.009) | 17.5                             | 22.4  | 113.9 | 93.7  |
| cLOR <sub>25</sub> | 0.589 (0.013)                      | 0.541 (0.012) | 0.531 (0.012) | 0.406 (0.009) | 0.423 (0.009) | 18.5                             | 23.4  | 110.9 | 94.1  |
| cLOR <sub>34</sub> | 0.848 (0.019)                      | 0.804 (0.018) | 0.784 (0.018) | 0.367 (0.008) | 0.555 (0.012) | 11.1                             | 17.0  | 432.5 | 133.1 |
| cLOR <sub>35</sub> | 0.851 (0.019)                      | 0.802 (0.018) | 0.783 (0.018) | 0.368 (0.008) | 0.550 (0.012) | 12.6                             | 18.2  | 436.1 | 139.8 |
| cLOR <sub>45</sub> | 0.304 (0.007)                      | 0.295 (0.007) | 0.300 (0.007) | 0.291 (0.007) | 0.280 (0.006) | 6.2                              | 2.9   | 9.3   | 18.2  |
| $\mu_1$            | 0.125 (0.003)                      | 0.126 (0.003) | 0.130 (0.003) | 0.122 (0.003) | 0.122 (0.003) | -0.2                             | -6.7  | 6.6   | 5.1   |
| $\mu_2$            | 0.533 (0.012)                      | 0.489 (0.011) | 0.478 (0.011) | 0.345 (0.008) | 0.367 (0.008) | 18.7                             | 24.4  | 138.2 | 110.3 |
| $\mu_3$            | 0.827 (0.018)                      | 0.784 (0.018) | 0.766 (0.017) | 0.309 (0.007) | 0.529 (0.012) | 11.0                             | 16.5  | 614.7 | 143.9 |
| $\mu_4$            | 0.202 (0.005)                      | 0.200 (0.004) | 0.202 (0.005) | 0.199 (0.004) | 0.194 (0.004) | 1.7                              | -0.2  | 3.1   | 8.8   |
| $\mu_5$            | 0.217 (0.005)                      | 0.213 (0.005) | 0.217 (0.005) | 0.216 (0.005) | 0.210 (0.005) | 3.8                              | -0.8  | 0.3   | 6.3   |
| $p_1$              | 0.014 (0.000)                      | 0.014 (0.000) | 0.017 (0.000) | 0.014 (0.000) | 0.014 (0.000) | -0.1                             | -37.5 | -5.7  | -4.9  |
| $p_2$              | 0.037 (0.001)                      | 0.032 (0.001) | 0.035 (0.001) | 0.037 (0.001) | 0.027 (0.001) | 32.5                             | 10.3  | -3.3  | 85.2  |
| $p_3$              | 0.070 (0.002)                      | 0.067 (0.001) | 0.067 (0.001) | 0.049 (0.001) | 0.051 (0.001) | 10.1                             | 10.4  | 103.2 | 85.4  |
| $p_4$              | 0.021 (0.000)                      | 0.021 (0.000) | 0.025 (0.001) | 0.020 (0.000) | 0.019 (0.000) | 2.5                              | -24.4 | 18.9  | 23.2  |
| $p_5$              | 0.032 (0.001)                      | 0.031 (0.001) | 0.035 (0.001) | 0.029 (0.001) | 0.029 (0.001) | 8.4                              | -14.1 | 22.2  | 27.2  |
| $\delta_1$         | 0.133 (0.003)                      | 0.135 (0.003) | 0.199 (0.004) | 0.133 (0.003) | 0.134 (0.003) | -3.7                             | -55.6 | -0.9  | -2.2  |
| $\delta_2$         | 0.632 (0.014)                      | 0.450 (0.010) | 0.472 (0.011) | 0.579 (0.013) | 0.408 (0.009) | 97.2                             | 79.5  | 19.1  | 139.8 |
| $\delta_3$         | 0.702 (0.016)                      | 0.585 (0.013) | 0.476 (0.011) | 0.702 (0.016) | 0.447 (0.010) | 44.0                             | 117.4 | 0.1   | 146.5 |
| $\delta_4$         | 0.234 (0.005)                      | 0.211 (0.005) | 0.315 (0.007) | 0.227 (0.005) | 0.204 (0.005) | 23.4                             | -44.8 | 6.0   | 31.8  |
| $\delta_5$         | 0.308 (0.007)                      | 0.271 (0.006) | 0.420 (0.009) | 0.286 (0.006) | 0.249 (0.006) | 29.3                             | -46.4 | 15.4  | 52.4  |
| $\rho$             | 0.209 (0.005)                      | 0.214 (0.005) | 0.208 (0.005) | 0.217 (0.005) | 0.218 (0.005) | -4.3                             | 1.0   | -6.6  | -7.8  |

TABLE C32

Simulation results comparing data generated under the UM-UV scenario with MAR missingness of treatment arms. The Empse and the Monte Carlo standard error of the posterior median are rounded to 3 decimal places for the five methods (NB, CPV, FBV, CPM, and DCP). The relative percent increase in precision when comparing four methods (CPV, FBV, CPM, and DCP) versus NB is also summarized.

| Parameter          | Empse (Monte Carlo standard error) |               |               |               |               | Relative % increase in precision |       |       |       |
|--------------------|------------------------------------|---------------|---------------|---------------|---------------|----------------------------------|-------|-------|-------|
|                    | NB                                 | CPV           | FBV           | CPM           | DCP           | CPV                              | FBV   | CPM   | DCP   |
| cLOR <sub>12</sub> | 0.593 (0.013)                      | 0.492 (0.011) | 0.460 (0.010) | 0.341 (0.008) | 0.353 (0.008) | 45.5                             | 66.4  | 203.2 | 182.1 |
| cLOR <sub>13</sub> | 0.779 (0.017)                      | 0.742 (0.017) | 0.710 (0.016) | 0.322 (0.007) | 0.498 (0.011) | 10.2                             | 20.1  | 486.0 | 144.7 |
| cLOR <sub>14</sub> | 0.215 (0.005)                      | 0.215 (0.005) | 0.219 (0.005) | 0.209 (0.005) | 0.208 (0.005) | 0.5                              | -3.7  | 5.9   | 7.1   |
| cLOR <sub>15</sub> | 0.284 (0.006)                      | 0.260 (0.006) | 0.283 (0.006) | 0.241 (0.005) | 0.235 (0.005) | 18.8                             | 0.6   | 39.0  | 46.1  |
| cLOR <sub>23</sub> | 0.949 (0.021)                      | 0.864 (0.019) | 0.822 (0.018) | 0.449 (0.010) | 0.584 (0.013) | 20.4                             | 33.3  | 346.9 | 164.2 |
| cLOR <sub>24</sub> | 0.643 (0.014)                      | 0.541 (0.012) | 0.511 (0.011) | 0.385 (0.009) | 0.395 (0.009) | 41.5                             | 58.3  | 179.6 | 164.7 |
| cLOR <sub>25</sub> | 0.714 (0.016)                      | 0.582 (0.013) | 0.558 (0.012) | 0.408 (0.009) | 0.411 (0.009) | 50.7                             | 63.7  | 205.6 | 201.6 |
| cLOR <sub>34</sub> | 0.818 (0.018)                      | 0.782 (0.018) | 0.753 (0.017) | 0.362 (0.008) | 0.533 (0.012) | 9.4                              | 18.0  | 410.7 | 135.7 |
| cLOR <sub>35</sub> | 0.840 (0.019)                      | 0.792 (0.018) | 0.766 (0.017) | 0.378 (0.008) | 0.538 (0.012) | 12.5                             | 20.3  | 394.8 | 143.9 |
| cLOR <sub>45</sub> | 0.317 (0.007)                      | 0.302 (0.007) | 0.320 (0.007) | 0.283 (0.006) | 0.277 (0.006) | 10.5                             | -1.5  | 25.9  | 31.1  |
| $\mu_1$            | 0.126 (0.003)                      | 0.126 (0.003) | 0.130 (0.003) | 0.123 (0.003) | 0.123 (0.003) | -0.2                             | -6.7  | 4.9   | 4.1   |
| $\mu_2$            | 0.608 (0.014)                      | 0.507 (0.011) | 0.476 (0.011) | 0.341 (0.008) | 0.358 (0.008) | 44.1                             | 63.2  | 218.5 | 188.6 |
| $\mu_3$            | 0.789 (0.018)                      | 0.751 (0.017) | 0.719 (0.016) | 0.305 (0.007) | 0.498 (0.011) | 10.3                             | 20.4  | 570.6 | 150.8 |
| $\mu_4$            | 0.200 (0.004)                      | 0.200 (0.004) | 0.204 (0.005) | 0.195 (0.004) | 0.192 (0.004) | 0.2                              | -3.2  | 5.2   | 8.6   |
| $\mu_5$            | 0.269 (0.006)                      | 0.242 (0.005) | 0.263 (0.006) | 0.225 (0.005) | 0.217 (0.005) | 23.2                             | 4.3   | 43.0  | 53.0  |
| $p_1$              | 0.014 (0.000)                      | 0.014 (0.000) | 0.017 (0.000) | 0.014 (0.000) | 0.014 (0.000) | -0.5                             | -37.9 | -8.1  | -6.5  |
| $p_2$              | 0.030 (0.001)                      | 0.031 (0.001) | 0.034 (0.001) | 0.031 (0.001) | 0.025 (0.001) | -5.0                             | -21.7 | -6.3  | 38.3  |
| $p_3$              | 0.065 (0.001)                      | 0.062 (0.001) | 0.062 (0.001) | 0.048 (0.001) | 0.048 (0.001) | 11.0                             | 11.8  | 84.0  | 89.7  |
| $p_4$              | 0.024 (0.001)                      | 0.022 (0.000) | 0.027 (0.001) | 0.021 (0.000) | 0.020 (0.000) | 19.5                             | -20.0 | 31.2  | 46.8  |
| $p_5$              | 0.050 (0.001)                      | 0.041 (0.001) | 0.051 (0.001) | 0.035 (0.001) | 0.032 (0.001) | 48.3                             | -3.3  | 109.9 | 142.4 |
| $\delta_1$         | 0.130 (0.003)                      | 0.134 (0.003) | 0.199 (0.004) | 0.134 (0.003) | 0.138 (0.003) | -6.6                             | -57.5 | -5.9  | -11.1 |
| $\delta_2$         | 0.622 (0.014)                      | 0.425 (0.010) | 0.431 (0.010) | 0.510 (0.011) | 0.374 (0.008) | 114.2                            | 108.8 | 48.9  | 177.2 |
| $\delta_3$         | 0.695 (0.016)                      | 0.605 (0.014) | 0.450 (0.010) | 0.687 (0.015) | 0.444 (0.010) | 31.8                             | 138.7 | 2.3   | 144.4 |
| $\delta_4$         | 0.275 (0.006)                      | 0.228 (0.005) | 0.332 (0.007) | 0.235 (0.005) | 0.208 (0.005) | 45.2                             | -31.6 | 36.0  | 74.2  |
| $\delta_5$         | 0.326 (0.007)                      | 0.273 (0.006) | 0.429 (0.010) | 0.260 (0.006) | 0.235 (0.005) | 43.0                             | -42.1 | 57.4  | 92.2  |
| $\rho$             | 0.186 (0.004)                      | 0.185 (0.004) | 0.200 (0.004) | 0.206 (0.005) | 0.186 (0.004) | 2.0                              | -13.1 | -18.4 | 0.9   |

**C.5. Effective sample size (ESS).** Tables C33–C40 provide median and minimum effective sample size among 1000 simulations for the five methods (NB, CPV, FBV, CPM, and DCP) using different data-generating mechanisms (EM-EV, UM-EV, EM-UV, and UM-UV) and missingness structures (MCAR and MAR).

TABLE C33

*Simulation results comparing data generated under the EM-EV scenario with MCAR missingness of treatment arms. The median and minimum effective sample size of the posterior median among 1000 simulations are summarized for the five methods (NB, CPV, FBV, CPM, and DCP)*

| Parameter          | Median ESS (minimum ESS) |              |              |              |              |
|--------------------|--------------------------|--------------|--------------|--------------|--------------|
|                    | NB                       | CPV          | FBV          | CPM          | DCP          |
| cLOR <sub>12</sub> | 21878 (3691)             | 17633 (3870) | 28799 (4767) | 17476 (3732) | 14245 (3210) |
| cLOR <sub>13</sub> | 12591 (1785)             | 5470 (968)   | 13924 (1878) | 11545 (1977) | 8287 (1588)  |
| cLOR <sub>14</sub> | 10571 (1789)             | 11413 (2770) | 17800 (3787) | 15638 (3411) | 11411 (3009) |
| cLOR <sub>15</sub> | 7532 (824)               | 7737 (1487)  | 12235 (2797) | 11514 (1537) | 9155 (2295)  |
| cLOR <sub>23</sub> | 12951 (2038)             | 6348 (975)   | 14981 (2122) | 12361 (2436) | 9154 (1904)  |
| cLOR <sub>24</sub> | 15451 (2341)             | 14814 (3232) | 24316 (4829) | 15998 (3951) | 12821 (3315) |
| cLOR <sub>25</sub> | 11480 (2148)             | 12158 (2618) | 20089 (4248) | 14207 (3947) | 11741 (2742) |
| cLOR <sub>34</sub> | 12035 (1865)             | 5508 (972)   | 13697 (1884) | 11337 (2111) | 8080 (1608)  |
| cLOR <sub>35</sub> | 10975 (1809)             | 5402 (971)   | 13208 (1781) | 11032 (2274) | 7978 (1672)  |
| cLOR <sub>45</sub> | 8078 (1038)              | 7360 (1575)  | 11763 (2860) | 11381 (2721) | 8186 (2448)  |
| $\mu_1$            | 52802 (10427)            | 41960 (5185) | 55832 (6932) | 39616 (8143) | 37326 (4286) |
| $\mu_2$            | 22178 (3720)             | 17922 (3351) | 28903 (4762) | 17282 (3770) | 14137 (3024) |
| $\mu_3$            | 12780 (1769)             | 5521 (973)   | 13994 (1834) | 11507 (2021) | 8222 (1583)  |
| $\mu_4$            | 9879 (1463)              | 9601 (1914)  | 15358 (3272) | 13859 (3067) | 9554 (2101)  |
| $\mu_5$            | 7490 (782)               | 6874 (1406)  | 11000 (2645) | 10681 (1482) | 7877 (1755)  |
| $p_1$              | 55846 (10475)            | 45022 (5128) | 58027 (6949) | 43286 (7904) | 40457 (4104) |
| $p_2$              | 22749 (3558)             | 16500 (2522) | 32356 (3101) | 22279 (2714) | 15820 (3016) |
| $p_3$              | 13032 (2675)             | 6800 (802)   | 15320 (1856) | 13097 (2457) | 7571 (1910)  |
| $p_4$              | 8432 (1356)              | 9218 (1921)  | 15824 (3030) | 10011 (2499) | 9392 (1860)  |
| $p_5$              | 8192 (821)               | 7129 (1212)  | 11612 (2454) | 8638 (1273)  | 7741 (1489)  |
| $\delta_1$         | 37712 (6570)             | 19887 (2560) | 41686 (5970) | 40041 (7140) | 19620 (3100) |
| $\delta_2$         | 16874 (2829)             | 9665 (2254)  | 24341 (3113) | 17928 (2996) | 9960 (2426)  |
| $\delta_3$         | 10743 (1864)             | 3068 (222)   | 15550 (2073) | 11377 (2137) | 4755 (614)   |
| $\delta_4$         | 5128 (1050)              | 4540 (1521)  | 11434 (3154) | 7059 (1633)  | 4865 (1430)  |
| $\delta_5$         | 4808 (675)               | 3095 (897)   | 6935 (1652)  | 5227 (857)   | 3889 (1112)  |
| $\rho$             | 10232 (4033)             | 8645 (3817)  | 11817 (4467) | 11015 (4099) | 9069 (3556)  |

TABLE C34

*Simulation results comparing data generated under the EM-EV scenario with MAR missingness of treatment arms. The median and minimum effective sample size of the posterior median among 1000 simulations are summarized for the five methods (NB, CPV, FBV, CPM, and DCP)*

| Parameter          | Median ESS (minimum ESS) |              |              |              |              |
|--------------------|--------------------------|--------------|--------------|--------------|--------------|
|                    | NB                       | CPV          | FBV          | CPM          | DCP          |
| cLOR <sub>12</sub> | 7230 (1444)              | 7462 (1740)  | 11496 (2931) | 8862 (1186)  | 7786 (1167)  |
| cLOR <sub>13</sub> | 12244 (4228)             | 5812 (552)   | 14621 (3484) | 11994 (3161) | 8832 (1845)  |
| cLOR <sub>14</sub> | 7628 (1274)              | 9736 (3027)  | 14963 (4664) | 13638 (2546) | 10879 (3270) |
| cLOR <sub>15</sub> | 3343 (435)               | 4082 (909)   | 6283 (1262)  | 6924 (1234)  | 6239 (1119)  |
| cLOR <sub>23</sub> | 10173 (3509)             | 5800 (555)   | 12921 (4241) | 10324 (2052) | 8091 (2017)  |
| cLOR <sub>24</sub> | 6514 (1540)              | 7066 (1807)  | 10786 (3013) | 8599 (1345)  | 7489 (1371)  |
| cLOR <sub>25</sub> | 4333 (818)               | 5414 (1399)  | 8326 (2109)  | 7216 (1259)  | 6646 (1227)  |
| cLOR <sub>34</sub> | 11124 (3676)             | 5761 (556)   | 14255 (3551) | 11718 (3038) | 8616 (1726)  |
| cLOR <sub>35</sub> | 7297 (1220)              | 5145 (552)   | 12027 (2157) | 9942 (2285)  | 7979 (1971)  |
| cLOR <sub>45</sub> | 3847 (514)               | 4434 (925)   | 6907 (1633)  | 7852 (1365)  | 6439 (1652)  |
| $\mu_1$            | 37479 (9248)             | 41466 (3817) | 49036 (8202) | 33985 (8934) | 37846 (4464) |
| $\mu_2$            | 7434 (1434)              | 7557 (1747)  | 11549 (2991) | 8899 (1189)  | 7789 (1203)  |
| $\mu_3$            | 12389 (4331)             | 5836 (552)   | 14693 (3444) | 11894 (3203) | 8838 (1873)  |
| $\mu_4$            | 7364 (1180)              | 8207 (2264)  | 13045 (3557) | 12172 (2562) | 8918 (2315)  |
| $\mu_5$            | 3342 (438)               | 3738 (798)   | 5870 (1272)  | 6587 (1151)  | 5501 (1008)  |
| $p_1$              | 38647 (9198)             | 44095 (3906) | 51602 (8219) | 36794 (8978) | 40567 (4795) |
| $p_2$              | 18073 (4851)             | 14697 (4120) | 21741 (6618) | 20417 (3474) | 15041 (3086) |
| $p_3$              | 12655 (3041)             | 7224 (1358)  | 16368 (3446) | 14011 (3145) | 8036 (1818)  |
| $p_4$              | 4725 (708)               | 6457 (1278)  | 11212 (2746) | 7096 (1376)  | 7458 (2128)  |
| $p_5$              | 3334 (476)               | 3262 (683)   | 5286 (1241)  | 5260 (882)   | 4665 (860)   |
| $\delta_1$         | 30123 (6020)             | 19888 (2376) | 38646 (6331) | 35501 (5416) | 19896 (3011) |
| $\delta_2$         | 9562 (1438)              | 7943 (1674)  | 17618 (3289) | 13888 (1315) | 8732 (1108)  |
| $\delta_3$         | 10333 (1943)             | 2950 (302)   | 15549 (1969) | 11117 (2191) | 4559 (928)   |
| $\delta_4$         | 3895 (686)               | 3837 (989)   | 9315 (2549)  | 5682 (1091)  | 4360 (1510)  |
| $\delta_5$         | 3579 (493)               | 2566 (783)   | 5285 (1258)  | 4947 (793)   | 3581 (762)   |
| $\rho$             | 6620 (2854)              | 6564 (2665)  | 8539 (3545)  | 8265 (3325)  | 7419 (3169)  |

TABLE C35

*Simulation results comparing data generated under the UM-EV scenario with MCAR missingness of treatment arms. The median and minimum effective sample size of the posterior median among 1000 simulations are summarized for the five methods (NB, CPV, FBV, CPM, and DCP)*

| Parameter          | Median ESS (minimum ESS) |              |              |               |              |
|--------------------|--------------------------|--------------|--------------|---------------|--------------|
|                    | NB                       | CPV          | FBV          | CPM           | DCP          |
| cLOR <sub>12</sub> | 21822 (3841)             | 17764 (3330) | 29165 (6122) | 19273 (4470)  | 16234 (3472) |
| cLOR <sub>13</sub> | 12570 (1472)             | 5591 (562)   | 13677 (1089) | 12199 (1925)  | 9159 (1901)  |
| cLOR <sub>14</sub> | 10647 (1741)             | 11912 (2995) | 18271 (4370) | 14567 (2938)  | 11320 (2892) |
| cLOR <sub>15</sub> | 7598 (903)               | 7840 (2086)  | 12583 (3032) | 11339 (1769)  | 9183 (2043)  |
| cLOR <sub>23</sub> | 13016 (1691)             | 6313 (566)   | 14991 (1362) | 13006 (2670)  | 10175 (2328) |
| cLOR <sub>24</sub> | 15736 (2281)             | 14965 (3646) | 25073 (5950) | 15909 (4289)  | 13655 (3741) |
| cLOR <sub>25</sub> | 11348 (2034)             | 12188 (2701) | 20122 (4303) | 14031 (3779)  | 12186 (3003) |
| cLOR <sub>34</sub> | 11869 (1595)             | 5598 (561)   | 13569 (1181) | 11681 (2267)  | 8932 (2018)  |
| cLOR <sub>35</sub> | 11096 (1553)             | 5435 (562)   | 13094 (1152) | 11026 (2131)  | 8728 (2035)  |
| cLOR <sub>45</sub> | 8087 (1560)              | 7605 (1761)  | 12331 (2988) | 10899 (2543)  | 8451 (1959)  |
| $\mu_1$            | 52597 (9967)             | 41534 (3170) | 53903 (6047) | 45710 (10439) | 38877 (3692) |
| $\mu_2$            | 22264 (3890)             | 18220 (3391) | 29638 (6084) | 18699 (3884)  | 16194 (3464) |
| $\mu_3$            | 12699 (1498)             | 5601 (563)   | 13802 (1086) | 12063 (1914)  | 9157 (1841)  |
| $\mu_4$            | 9990 (1762)              | 10120 (2113) | 16511 (3240) | 12668 (2476)  | 9503 (1903)  |
| $\mu_5$            | 7510 (841)               | 7092 (1740)  | 11611 (2701) | 10321 (1596)  | 8121 (1914)  |
| $p_1$              | 56232 (9854)             | 44737 (3204) | 56215 (6321) | 48040 (10702) | 40167 (3718) |
| $p_2$              | 23100 (2712)             | 17071 (1902) | 33303 (3999) | 20337 (2852)  | 15761 (3254) |
| $p_3$              | 13156 (2655)             | 6917 (748)   | 15518 (1856) | 11835 (2505)  | 7956 (1443)  |
| $p_4$              | 8592 (1437)              | 9705 (1920)  | 17073 (3187) | 12401 (2445)  | 10510 (1926) |
| $p_5$              | 8089 (832)               | 7230 (1428)  | 12310 (2421) | 11697 (1320)  | 8768 (1841)  |
| $\delta_1$         | 37933 (6519)             | 20154 (2984) | 40270 (6520) | 40818 (7190)  | 20499 (3150) |
| $\delta_2$         | 17169 (2390)             | 9985 (1875)  | 26827 (3972) | 18640 (3145)  | 11085 (2666) |
| $\delta_3$         | 10540 (1684)             | 3107 (292)   | 16226 (2185) | 11473 (1695)  | 5087 (1150)  |
| $\delta_4$         | 5100 (796)               | 4658 (1589)  | 11431 (2738) | 7260 (1348)   | 5327 (1421)  |
| $\delta_5$         | 4766 (695)               | 3174 (948)   | 7133 (1568)  | 6009 (641)    | 4227 (1227)  |
| $\rho$             | 10216 (4133)             | 8649 (3697)  | 11728 (4893) | 11040 (3923)  | 9320 (3137)  |



TABLE C36

*Simulation results comparing data generated under the UM-EV scenario with MAR missingness of treatment arms. The median and minimum effective sample size of the posterior median among 1000 simulations are summarized for the five methods (NB, CPV, FBV, CPM, and DCP)*

| Parameter          | Median ESS (minimum ESS) |              |              |              |              |
|--------------------|--------------------------|--------------|--------------|--------------|--------------|
|                    | NB                       | CPV          | FBV          | CPM          | DCP          |
| cLOR <sub>12</sub> | 7184 (1483)              | 7793 (2135)  | 12135 (3161) | 11003 (1673) | 10511 (2335) |
| cLOR <sub>13</sub> | 12104 (4328)             | 5932 (638)   | 14625 (2929) | 14003 (3868) | 10519 (2729) |
| cLOR <sub>14</sub> | 7551 (1341)              | 10007 (2934) | 15139 (3923) | 14468 (2647) | 12029 (3607) |
| cLOR <sub>15</sub> | 3303 (364)               | 4130 (593)   | 6248 (1481)  | 8269 (1518)  | 7636 (1661)  |
| cLOR <sub>23</sub> | 10116 (3454)             | 5896 (685)   | 13158 (3654) | 12676 (2758) | 10255 (2605) |
| cLOR <sub>24</sub> | 6501 (1767)              | 7341 (2082)  | 11356 (3523) | 9988 (2096)  | 9466 (2182)  |
| cLOR <sub>25</sub> | 4307 (603)               | 5452 (1319)  | 8396 (2378)  | 8107 (1716)  | 7984 (2016)  |
| cLOR <sub>34</sub> | 10999 (3702)             | 5912 (641)   | 14189 (3199) | 13240 (3833) | 10109 (2733) |
| cLOR <sub>35</sub> | 7204 (1336)              | 5212 (676)   | 11591 (2157) | 11165 (2831) | 9570 (2524)  |
| cLOR <sub>45</sub> | 3828 (444)               | 4577 (726)   | 7098 (1551)  | 9572 (1587)  | 8015 (1896)  |
| $\mu_1$            | 38069 (10672)            | 39785 (4038) | 47977 (8082) | 46802 (9813) | 46032 (3628) |
| $\mu_2$            | 7450 (1513)              | 7905 (2166)  | 12218 (2941) | 10858 (1680) | 10343 (2176) |
| $\mu_3$            | 12231 (4211)             | 5959 (645)   | 14693 (2807) | 13894 (3891) | 10525 (2633) |
| $\mu_4$            | 7389 (1136)              | 8664 (2305)  | 13636 (3284) | 12205 (2409) | 9814 (2848)  |
| $\mu_5$            | 3314 (323)               | 3850 (611)   | 5932 (1372)  | 7688 (1449)  | 6646 (1517)  |
| $p_1$              | 39664 (11151)            | 42306 (4075) | 49109 (8142) | 48335 (9938) | 47334 (3850) |
| $p_2$              | 18354 (3653)             | 14830 (3758) | 21494 (5787) | 19949 (3609) | 15848 (2856) |
| $p_3$              | 12673 (2834)             | 7261 (1521)  | 16249 (1985) | 14225 (3104) | 8889 (1173)  |
| $p_4$              | 4719 (860)               | 6767 (1801)  | 11616 (2755) | 9635 (1698)  | 9180 (2235)  |
| $p_5$              | 3338 (359)               | 3326 (666)   | 5431 (1239)  | 6828 (1179)  | 5767 (1252)  |
| $\delta_1$         | 30208 (6771)             | 20878 (2960) | 37779 (5957) | 40959 (6685) | 23357 (2981) |
| $\delta_2$         | 9583 (1473)              | 8300 (1831)  | 19720 (3138) | 16929 (1774) | 11202 (2131) |
| $\delta_3$         | 10163 (2123)             | 2973 (458)   | 15397 (2238) | 12204 (2325) | 5364 (546)   |
| $\delta_4$         | 3803 (702)               | 3995 (1137)  | 9325 (2684)  | 6608 (1291)  | 5136 (1597)  |
| $\delta_5$         | 3519 (272)               | 2647 (695)   | 5412 (1233)  | 5833 (1085)  | 4098 (1175)  |
| $\rho$             | 6665 (3136)              | 6625 (3246)  | 8570 (3768)  | 7989 (3191)  | 7559 (2775)  |

TABLE C37

*Simulation results comparing data generated under the EM-UV scenario with MCAR missingness of treatment arms. The median and minimum effective sample size of the posterior median among 1000 simulations are summarized for the five methods (NB, CPV, FBV, CPM, and DCP)*

| Parameter          | Median ESS (minimum ESS) |              |                |               |              |
|--------------------|--------------------------|--------------|----------------|---------------|--------------|
|                    | NB                       | CPV          | FBV            | CPM           | DCP          |
| cLOR <sub>12</sub> | 22108 (3726)             | 18004 (2921) | 41494 (4251)   | 18856 (4715)  | 15041 (2615) |
| cLOR <sub>13</sub> | 12496 (1658)             | 5169 (701)   | 16423 (1829)   | 13697 (2905)  | 8161 (1408)  |
| cLOR <sub>14</sub> | 10621 (1842)             | 16031 (2312) | 42827 (8196)   | 13150 (3141)  | 14668 (3731) |
| cLOR <sub>15</sub> | 7501 (848)               | 9401 (1689)  | 26946 (6107)   | 9361 (1535)   | 10177 (2423) |
| cLOR <sub>23</sub> | 12864 (1879)             | 6523 (872)   | 19737 (2072)   | 14438 (3503)  | 9625 (1980)  |
| cLOR <sub>24</sub> | 15673 (3030)             | 15568 (3650) | 34034 (6554)   | 15200 (3693)  | 13241 (4012) |
| cLOR <sub>25</sub> | 11624 (1922)             | 11645 (2151) | 27697 (5947)   | 12308 (2819)  | 11211 (3091) |
| cLOR <sub>34</sub> | 12041 (1692)             | 5572 (873)   | 17330 (1850)   | 12780 (2821)  | 8557 (1918)  |
| cLOR <sub>35</sub> | 11011 (1714)             | 5399 (873)   | 16991 (2057)   | 11338 (3108)  | 8053 (1894)  |
| cLOR <sub>45</sub> | 7925 (1050)              | 9783 (2039)  | 25491 (5597)   | 9204 (2804)   | 9936 (2922)  |
| $\mu_1$            | 52706 (9712)             | 52449 (4684) | 79115 (10705)  | 38251 (9983)  | 39324 (5256) |
| $\mu_2$            | 22268 (3802)             | 18164 (2256) | 37347 (3369)   | 18285 (4344)  | 14469 (2708) |
| $\mu_3$            | 12621 (1661)             | 5007 (629)   | 14834 (1359)   | 13610 (2913)  | 7801 (1315)  |
| $\mu_4$            | 9928 (1712)              | 14893 (2236) | 35122 (5122)   | 11384 (3002)  | 12883 (2718) |
| $\mu_5$            | 7405 (906)               | 8945 (1706)  | 23190 (5370)   | 8654 (1481)   | 9245 (2239)  |
| $p_1$              | 55848 (9749)             | 54641 (4537) | 81089 (12878)  | 41565 (10841) | 42663 (5298) |
| $p_2$              | 22832 (3118)             | 17184 (2819) | 40517 (5023)   | 22810 (2684)  | 16590 (3065) |
| $p_3$              | 13175 (2879)             | 5538 (787)   | 16003 (1759)   | 14179 (3200)  | 6631 (1362)  |
| $p_4$              | 8608 (1593)              | 13473 (2143) | 35539 (5222)   | 9423 (1815)   | 12388 (2229) |
| $p_5$              | 8059 (960)               | 9822 (1789)  | 24903 (3914)   | 8353 (1317)   | 9323 (2069)  |
| $\delta_1$         | 38259 (6639)             | 33303 (3609) | 107055 (26740) | 39189 (7353)  | 32834 (4078) |
| $\delta_2$         | 16908 (2995)             | 9444 (2037)  | 27368 (4527)   | 17886 (3019)  | 9983 (2413)  |
| $\delta_3$         | 10521 (1855)             | 2614 (440)   | 12393 (1246)   | 11272 (2743)  | 3992 (1038)  |
| $\delta_4$         | 5153 (1071)              | 7060 (1721)  | 29192 (5109)   | 6556 (1129)   | 7823 (1747)  |
| $\delta_5$         | 4729 (596)               | 4414 (1224)  | 17290 (3597)   | 5172 (1053)   | 5564 (1384)  |
| $\rho$             | 10449 (4043)             | 9738 (3115)  | 19333 (4575)   | 10994 (4449)  | 10340 (3554) |

TABLE C38

*Simulation results comparing data generated under the EM-UV scenario with MAR missingness of treatment arms. The median and minimum effective sample size of the posterior median among 1000 simulations are summarized for the five methods (NB, CPV, FBV, CPM, and DCP)*

| Parameter          | Median ESS (minimum ESS) |              |                |               |              |
|--------------------|--------------------------|--------------|----------------|---------------|--------------|
|                    | NB                       | CPV          | FBV            | CPM           | DCP          |
| cLOR <sub>12</sub> | 7168 (1450)              | 7593 (1764)  | 21094 (2760)   | 9274 (1524)   | 8280 (1556)  |
| cLOR <sub>13</sub> | 12356 (4055)             | 5346 (683)   | 18242 (1449)   | 14281 (4066)  | 8535 (1958)  |
| cLOR <sub>14</sub> | 7527 (1674)              | 13522 (1910) | 41732 (9694)   | 10782 (1827)  | 13099 (2470) |
| cLOR <sub>15</sub> | 3324 (425)               | 4854 (1061)  | 16794 (2411)   | 5557 (1146)   | 6607 (1020)  |
| cLOR <sub>23</sub> | 10098 (3322)             | 5658 (683)   | 17585 (3131)   | 11184 (2798)  | 8187 (2155)  |
| cLOR <sub>24</sub> | 6548 (1846)              | 7406 (1843)  | 20155 (3569)   | 8269 (2064)   | 8075 (2080)  |
| cLOR <sub>25</sub> | 4327 (753)               | 5222 (1400)  | 14525 (2549)   | 6207 (1509)   | 6391 (1628)  |
| cLOR <sub>34</sub> | 11222 (3342)             | 5723 (689)   | 18673 (1710)   | 12458 (3058)  | 8680 (2030)  |
| cLOR <sub>35</sub> | 7122 (1491)              | 4518 (690)   | 15346 (1905)   | 8630 (1798)   | 6959 (1487)  |
| cLOR <sub>45</sub> | 3720 (502)               | 5704 (1149)  | 18598 (3168)   | 6338 (1103)   | 7388 (1127)  |
| $\mu_1$            | 37854 (10409)            | 47340 (5804) | 75265 (10195)  | 30478 (9635)  | 36996 (6101) |
| $\mu_2$            | 7398 (1397)              | 7689 (1836)  | 19978 (2647)   | 9329 (1535)   | 8157 (1430)  |
| $\mu_3$            | 12408 (4131)             | 5242 (684)   | 16483 (1354)   | 14253 (4159)  | 8204 (1827)  |
| $\mu_4$            | 7301 (1743)              | 12493 (1938) | 32109 (4926)   | 9589 (1840)   | 11587 (2448) |
| $\mu_5$            | 3319 (378)               | 4694 (989)   | 14872 (2125)   | 5403 (1027)   | 6165 (989)   |
| $p_1$              | 39778 (10916)            | 49383 (5752) | 77725 (10955)  | 32435 (10346) | 39215 (6211) |
| $p_2$              | 18223 (4200)             | 16443 (3237) | 44890 (5664)   | 21253 (4180)  | 17015 (2607) |
| $p_3$              | 12774 (2609)             | 5842 (881)   | 17537 (2225)   | 14592 (2519)  | 6841 (1055)  |
| $p_4$              | 4754 (935)               | 8947 (1261)  | 27236 (5077)   | 6522 (973)    | 9341 (1718)  |
| $p_5$              | 3342 (408)               | 4489 (920)   | 13868 (2087)   | 4734 (786)    | 5458 (917)   |
| $\delta_1$         | 29286 (6002)             | 32479 (4338) | 101346 (26906) | 33675 (8045)  | 33866 (3537) |
| $\delta_2$         | 9757 (1236)              | 7277 (1447)  | 17022 (2154)   | 14157 (1624)  | 8699 (1495)  |
| $\delta_3$         | 10101 (2120)             | 2404 (517)   | 12707 (2171)   | 10976 (1858)  | 3719 (707)   |
| $\delta_4$         | 3782 (661)               | 5986 (1326)  | 24659 (4466)   | 5173 (780)    | 6810 (1266)  |
| $\delta_5$         | 3512 (364)               | 3583 (789)   | 13803 (1899)   | 4820 (695)    | 5027 (1026)  |
| $\rho$             | 6614 (2906)              | 7171 (2776)  | 15109 (2626)   | 7734 (3393)   | 7938 (3196)  |

TABLE C39

Simulation results comparing data generated under the UM-UV scenario with MCAR missingness of treatment arms. The median and minimum effective sample size of the posterior median among 1000 simulations are summarized for the five methods (NB, CPV, FBV, CPM, and DCP)

| Parameter          | Median ESS (minimum ESS) |              |                |              |              |
|--------------------|--------------------------|--------------|----------------|--------------|--------------|
|                    | NB                       | CPV          | FBV            | CPM          | DCP          |
| cLOR <sub>12</sub> | 22133 (4273)             | 17479 (3128) | 42791 (6732)   | 21089 (4765) | 16733 (3923) |
| cLOR <sub>13</sub> | 12522 (1486)             | 4881 (652)   | 16397 (1436)   | 14779 (2915) | 8855 (1275)  |
| cLOR <sub>14</sub> | 10646 (1605)             | 15496 (3323) | 43531 (6062)   | 12570 (1634) | 14079 (2859) |
| cLOR <sub>15</sub> | 7460 (648)               | 9217 (1020)  | 27194 (6517)   | 8939 (1648)  | 9793 (1463)  |
| cLOR <sub>23</sub> | 13004 (1811)             | 6290 (649)   | 19137 (1773)   | 15680 (3672) | 10177 (1492) |
| cLOR <sub>24</sub> | 15767 (2583)             | 14347 (2389) | 34490 (5723)   | 15392 (3047) | 13810 (3381) |
| cLOR <sub>25</sub> | 11536 (2229)             | 11097 (1775) | 27392 (4045)   | 12122 (2362) | 11149 (2538) |
| cLOR <sub>34</sub> | 11949 (1519)             | 5403 (653)   | 17026 (1391)   | 13148 (3119) | 8883 (1233)  |
| cLOR <sub>35</sub> | 11037 (1578)             | 5330 (652)   | 17074 (1271)   | 11460 (2424) | 8230 (1283)  |
| cLOR <sub>45</sub> | 8037 (1538)              | 9549 (1340)  | 25816 (4050)   | 8970 (1727)  | 9662 (2047)  |
| $\mu_1$            | 51542 (8698)             | 52523 (6338) | 81843 (13005)  | 41676 (8985) | 43379 (5547) |
| $\mu_2$            | 22424 (4293)             | 17395 (2882) | 37868 (4707)   | 20396 (4379) | 16163 (3809) |
| $\mu_3$            | 12599 (1514)             | 4711 (653)   | 14330 (1072)   | 14533 (2921) | 8337 (1246)  |
| $\mu_4$            | 9995 (1632)              | 14108 (3282) | 34523 (4881)   | 11009 (1521) | 12223 (2589) |
| $\mu_5$            | 7429 (664)               | 8739 (1048)  | 22868 (3139)   | 8356 (1295)  | 8919 (1381)  |
| $p_1$              | 54926 (8785)             | 55348 (6084) | 83859 (14340)  | 43200 (9132) | 44256 (5819) |
| $p_2$              | 22731 (2917)             | 17532 (2627) | 40409 (5756)   | 20545 (2490) | 15559 (2846) |
| $p_3$              | 12992 (2354)             | 5437 (552)   | 15149 (1544)   | 12883 (3449) | 6787 (804)   |
| $p_4$              | 8637 (1675)              | 13143 (2441) | 35247 (3799)   | 11168 (1950) | 12951 (3125) |
| $p_5$              | 8164 (695)               | 9494 (975)   | 25278 (2782)   | 9923 (1466)  | 9992 (1267)  |
| $\delta_1$         | 37672 (6689)             | 33075 (3072) | 110671 (42655) | 38931 (7705) | 34106 (3922) |
| $\delta_2$         | 16990 (2768)             | 9534 (2130)  | 27623 (5109)   | 18566 (2545) | 10511 (2376) |
| $\delta_3$         | 10559 (1676)             | 2566 (360)   | 12493 (2197)   | 11674 (2259) | 4113 (752)   |
| $\delta_4$         | 5145 (838)               | 6804 (1568)  | 28382 (3356)   | 6462 (1160)  | 7537 (1780)  |
| $\delta_5$         | 4811 (504)               | 4224 (797)   | 16411 (2434)   | 5341 (659)   | 5312 (960)   |
| $\rho$             | 10113 (3811)             | 9752 (3725)  | 19902 (4484)   | 10922 (4196) | 10300 (3936) |

TABLE C40

*Simulation results comparing data generated under the UM-UV scenario with MAR missingness of treatment arms. The median and minimum effective sample size of the posterior median among 1000 simulations are summarized for the five methods (NB, CPV, FBV, CPM, and DCP)*

| Parameter          | Median ESS (minimum ESS) |              |                |              |              |
|--------------------|--------------------------|--------------|----------------|--------------|--------------|
|                    | NB                       | CPV          | FBV            | CPM          | DCP          |
| cLOR <sub>12</sub> | 7153 (1573)              | 7739 (1956)  | 25010 (4837)   | 11414 (1996) | 11123 (2691) |
| cLOR <sub>13</sub> | 12437 (3803)             | 5356 (824)   | 18402 (2466)   | 16939 (5016) | 10203 (1966) |
| cLOR <sub>14</sub> | 7608 (1327)              | 13327 (2449) | 43731 (6768)   | 11871 (1169) | 14623 (3162) |
| cLOR <sub>15</sub> | 3348 (371)               | 4885 (702)   | 18660 (1400)   | 6595 (1131)  | 7933 (1364)  |
| cLOR <sub>23</sub> | 10142 (3453)             | 5701 (854)   | 18149 (3008)   | 13929 (3682) | 10086 (2819) |
| cLOR <sub>24</sub> | 6502 (1691)              | 7634 (1892)  | 23441 (4816)   | 9681 (2112)  | 9905 (2607)  |
| cLOR <sub>25</sub> | 4377 (934)               | 5235 (907)   | 16651 (2579)   | 7204 (1720)  | 7641 (2121)  |
| cLOR <sub>34</sub> | 11319 (3295)             | 5683 (835)   | 18553 (2354)   | 14088 (2563) | 10003 (2415) |
| cLOR <sub>35</sub> | 7304 (1256)              | 4476 (776)   | 15978 (2089)   | 9983 (2300)  | 8029 (1883)  |
| cLOR <sub>45</sub> | 3838 (364)               | 5604 (932)   | 20099 (2099)   | 7551 (1328)  | 8764 (1485)  |
| $\mu_1$            | 37225 (7605)             | 48655 (5202) | 83019 (12321)  | 39008 (7525) | 50919 (4735) |
| $\mu_2$            | 7359 (1393)              | 7855 (1954)  | 23145 (3311)   | 11604 (1599) | 10603 (2248) |
| $\mu_3$            | 12516 (3924)             | 5173 (835)   | 16551 (2312)   | 16771 (5037) | 9449 (1890)  |
| $\mu_4$            | 7249 (1297)              | 12138 (2490) | 33620 (5572)   | 10149 (1108) | 12266 (3212) |
| $\mu_5$            | 3336 (344)               | 4650 (630)   | 15713 (1277)   | 6248 (1105)  | 7290 (1163)  |
| $p_1$              | 39071 (7664)             | 51242 (5170) | 85148 (13409)  | 37893 (7935) | 51411 (4767) |
| $p_2$              | 18270 (3877)             | 16673 (3403) | 47924 (5602)   | 21240 (3616) | 17518 (3198) |
| $p_3$              | 12841 (2748)             | 5614 (1111)  | 17638 (2186)   | 14812 (2655) | 7333 (1247)  |
| $p_4$              | 4638 (798)               | 8678 (2207)  | 28960 (4399)   | 8167 (1280)  | 10982 (2222) |
| $p_5$              | 3362 (488)               | 4535 (574)   | 14696 (1268)   | 5824 (1102)  | 6651 (976)   |
| $\delta_1$         | 29669 (6627)             | 33184 (3950) | 107552 (37133) | 38075 (7074) | 39213 (2606) |
| $\delta_2$         | 9609 (1178)              | 7458 (1710)  | 18453 (3328)   | 17101 (1769) | 10863 (1969) |
| $\delta_3$         | 10166 (1995)             | 2496 (408)   | 12800 (2359)   | 12001 (2189) | 4201 (1019)  |
| $\delta_4$         | 3813 (646)               | 5740 (1812)  | 23597 (4752)   | 5861 (920)   | 7278 (1951)  |
| $\delta_5$         | 3545 (433)               | 3638 (521)   | 14149 (1148)   | 5423 (827)   | 5497 (977)   |
| $\rho$             | 6612 (2864)              | 7189 (3029)  | 16832 (3542)   | 7770 (3004)  | 8260 (2514)  |

## APPENDIX D: ADDITIONAL SIMULATION RESULTS

Figure [D1](#) and Table [D1](#) present additional simulation results.

FIG D 1. Simulation results comparing data generated under the four different scenarios (EM-EV, UM-EV, EM-UV, and UM-UV) with the two different missingness settings (MCAR and MAR). For each estimand, the log of the ratio of 95% credible interval lengths (CrIL) of each of the four methods (NB, FBV, CPM, and DCP) versus the CPV method are presented as box plots with whiskers showing the 1st and 99th percentiles (outliers not displayed). Subplots show results for: (a) fixed effects of log-odds  $\mu_t$ ; (b) standard deviations of log-odds  $\sigma_t$ ; (c) absolute risks  $p_t$ ; and (d) log odds ratios  $LOR_{i,j}$ .

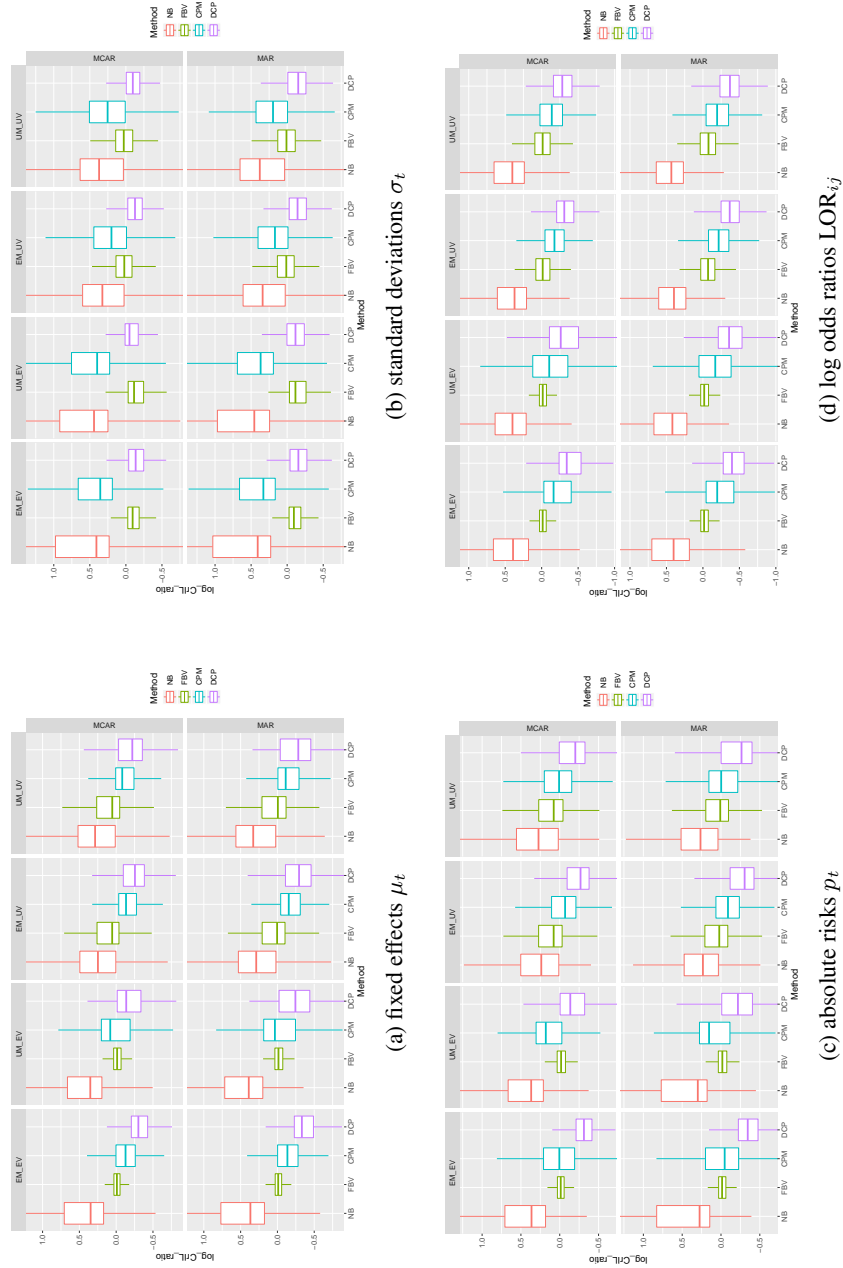

TABLE D1

Simulation results comparing data generated under four different scenarios (EM-EV, UM-EV, EM-UV, and UM-UV) with MCAR missingness of treatment arms. The estimated bias and mean squared error of the posterior median and the estimated coverage probability of the 95% credible interval are summarized for the five methods (NB, CPV, FBV, CPM, and DCP). For example, the value in the column of  $LOR_{ij}$  is calculated as  $\sum_{i \neq j} |bias(LOR_{ij})|$ ; the value in the column of coverage probability and in the row of  $LOR_{ij}$  is calculated as  $\sum_{i \neq j} (0.95 - CP(LOR_{ij}))_+$ .

| Parameter      | Truth | Bias  |       |       |       |       | Mean squared error |      |      |      |      | Coverage probability |      |      |      |      |
|----------------|-------|-------|-------|-------|-------|-------|--------------------|------|------|------|------|----------------------|------|------|------|------|
|                |       | NB    | CPV   | FBV   | CPM   | DCP   | NB                 | CPV  | FBV  | CPM  | DCP  | NB                   | CPV  | FBV  | CPM  | DCP  |
| Scenario EM-EV |       |       |       |       |       |       |                    |      |      |      |      |                      |      |      |      |      |
| $LOR_{ij}$     | .     | 0.57  | 0.49  | 0.53  | 0.34  | 0.39  | 4.27               | 4.04 | 3.99 | 1.99 | 2.11 | 0.00                 | 0.00 | 0.00 | 0.00 | 0.00 |
| $\mu_t$        | .     | 0.23  | 0.17  | 0.19  | 0.15  | 0.16  | 1.09               | 1.04 | 1.02 | 0.50 | 0.54 | 0.00                 | 0.01 | 0.02 | 0.00 | 0.00 |
| $p_t$          | .     | 0.08  | 0.03  | 0.04  | 0.07  | 0.02  | 0.01               | 0.01 | 0.01 | 0.01 | 0.00 | 0.00                 | 0.02 | 0.02 | 0.00 | 0.00 |
| $\delta_t$     | .     | 1.52  | 0.46  | 0.65  | 1.06  | 0.32  | 1.81               | 0.84 | 0.89 | 1.27 | 0.59 | 0.07                 | 0.04 | 0.09 | 0.03 | 0.05 |
| $LOR_{25}$     | -1.50 | -0.08 | -0.05 | -0.06 | -0.06 | -0.06 | 0.35               | 0.32 | 0.32 | 0.21 | 0.22 | 1.00                 | 0.98 | 0.98 | 0.99 | 0.97 |
| $p_5$          | 0.19  | 0.01  | 0.00  | 0.00  | 0.01  | 0.00  | 0.00               | 0.00 | 0.00 | 0.00 | 0.00 | 1.00                 | 0.97 | 0.98 | 1.00 | 0.98 |
| $\delta_5$     | 0.30  | 0.26  | -0.01 | 0.01  | 0.16  | -0.04 | 0.16               | 0.03 | 0.03 | 0.09 | 0.03 | 0.93                 | 0.98 | 0.98 | 0.95 | 0.99 |
| Scenario UM-EV |       |       |       |       |       |       |                    |      |      |      |      |                      |      |      |      |      |
| $LOR_{ij}$     | .     | 0.57  | 0.48  | 0.53  | 2.02  | 1.38  | 4.27               | 3.98 | 3.92 | 2.51 | 2.33 | 0.00                 | 0.00 | 0.00 | 0.00 | 0.02 |
| $\mu_t$        | .     | 0.23  | 0.17  | 0.19  | 0.63  | 0.44  | 1.09               | 1.02 | 1.01 | 0.62 | 0.59 | 0.00                 | 0.02 | 0.04 | 0.00 | 0.06 |
| $p_t$          | .     | 0.08  | 0.03  | 0.04  | 0.10  | 0.06  | 0.01               | 0.01 | 0.01 | 0.01 | 0.01 | 0.00                 | 0.03 | 0.04 | 0.05 | 0.07 |
| $\delta_t$     | .     | 1.52  | 0.39  | 0.58  | 1.23  | 0.25  | 1.81               | 0.75 | 0.76 | 1.40 | 0.54 | 0.07                 | 0.07 | 0.16 | 0.05 | 0.07 |
| $LOR_{25}$     | -1.50 | -0.08 | -0.05 | -0.06 | 0.25  | 0.17  | 0.35               | 0.31 | 0.31 | 0.27 | 0.24 | 1.00                 | 0.98 | 0.98 | 0.98 | 0.96 |
| $p_5$          | 0.19  | 0.01  | 0.00  | 0.00  | -0.00 | -0.01 | 0.00               | 0.00 | 0.00 | 0.00 | 0.00 | 1.00                 | 0.98 | 0.98 | 1.00 | 0.97 |
| $\delta_5$     | 0.30  | 0.26  | 0.00  | 0.03  | 0.24  | 0.02  | 0.16               | 0.03 | 0.03 | 0.13 | 0.03 | 0.93                 | 0.97 | 0.97 | 0.93 | 0.97 |
| Scenario EM-UV |       |       |       |       |       |       |                    |      |      |      |      |                      |      |      |      |      |
| $LOR_{ij}$     | .     | 0.57  | 0.31  | 0.24  | 0.47  | 0.38  | 4.26               | 3.78 | 3.64 | 1.35 | 1.96 | 0.00                 | 0.05 | 0.09 | 0.00 | 0.00 |
| $\mu_t$        | .     | 0.23  | 0.13  | 0.15  | 0.19  | 0.16  | 1.09               | 0.97 | 0.94 | 0.35 | 0.51 | 0.00                 | 0.05 | 0.07 | 0.00 | 0.00 |
| $p_t$          | .     | 0.08  | 0.03  | 0.08  | 0.06  | 0.02  | 0.01               | 0.01 | 0.01 | 0.01 | 0.00 | 0.00                 | 0.05 | 0.09 | 0.00 | 0.00 |
| $\delta_t$     | .     | 1.52  | 0.65  | 1.87  | 1.07  | 0.69  | 1.81               | 0.85 | 1.70 | 1.24 | 0.67 | 0.07                 | 0.03 | 1.87 | 0.04 | 0.02 |
| $LOR_{25}$     | -1.50 | -0.08 | -0.03 | -0.01 | -0.09 | -0.08 | 0.35               | 0.30 | 0.30 | 0.19 | 0.20 | 1.00                 | 0.99 | 0.99 | 0.99 | 0.99 |
| $p_5$          | 0.19  | 0.01  | 0.01  | 0.02  | 0.01  | 0.01  | 0.00               | 0.00 | 0.00 | 0.00 | 0.00 | 1.00                 | 0.99 | 0.99 | 0.99 | 0.98 |
| $\delta_5$     | 0.30  | 0.26  | 0.21  | 0.47  | 0.21  | 0.18  | 0.16               | 0.11 | 0.35 | 0.12 | 0.09 | 0.93                 | 0.94 | 0.54 | 0.94 | 0.94 |
| Scenario UM-UV |       |       |       |       |       |       |                    |      |      |      |      |                      |      |      |      |      |
| $LOR_{ij}$     | .     | 0.57  | 0.29  | 0.27  | 2.01  | 1.30  | 4.27               | 3.73 | 3.57 | 1.76 | 2.17 | 0.00                 | 0.08 | 0.12 | 0.00 | 0.06 |
| $\mu_t$        | .     | 0.23  | 0.11  | 0.14  | 0.64  | 0.43  | 1.09               | 0.96 | 0.92 | 0.45 | 0.56 | 0.00                 | 0.07 | 0.10 | 0.00 | 0.06 |
| $p_t$          | .     | 0.08  | 0.03  | 0.08  | 0.11  | 0.03  | 0.01               | 0.01 | 0.01 | 0.01 | 0.01 | 0.00                 | 0.07 | 0.11 | 0.09 | 0.05 |
| $\delta_t$     | .     | 1.52  | 0.71  | 1.86  | 1.15  | 0.79  | 1.81               | 0.82 | 1.65 | 1.35 | 0.66 | 0.06                 | 0.04 | 1.75 | 0.05 | 0.04 |
| $LOR_{25}$     | -1.50 | -0.08 | -0.01 | 0.01  | 0.22  | 0.17  | 0.35               | 0.29 | 0.28 | 0.21 | 0.21 | 1.00                 | 0.98 | 0.98 | 0.99 | 0.97 |
| $p_5$          | 0.19  | 0.01  | 0.01  | 0.02  | 0.01  | 0.00  | 0.00               | 0.00 | 0.00 | 0.00 | 0.00 | 1.00                 | 0.99 | 0.99 | 1.00 | 0.99 |
| $\delta_5$     | 0.30  | 0.26  | 0.21  | 0.48  | 0.23  | 0.20  | 0.16               | 0.12 | 0.41 | 0.14 | 0.10 | 0.93                 | 0.93 | 0.58 | 0.93 | 0.93 |



APPENDIX E: SENSITIVITY ANALYSES

This appendix presents sensitivity analyses testing how much importance should be placed on the mean and variance information from single-arm trials. We first focused on choice of  $p^m$  for the CPM method. For the CPM1, CPM2, and CPM3 methods mentioned in Figure E1, we selected  $p^m = 0.9, 0.5,$  and  $0.1$  respectively. As we can see, both standard deviations and absolute risks were quite sensitive to the choice of  $p^m$ , especially for the treatments ATE and IPI high.

FIG E1. Results for the dataset about safety of ICIs in cancer treatment: forest plot of posterior estimates of standard deviations  $\sigma_t$  and absolute risks  $p_t$  (posterior median with 95% credible interval). Different colors indicate different methods (CPM1, CPM2, CPM3, and NB). The y-axis represents regimen abbreviations, with the number of RCTs ( $B_t$ ) and single-arm trials ( $B_t^s$ ) in parentheses.

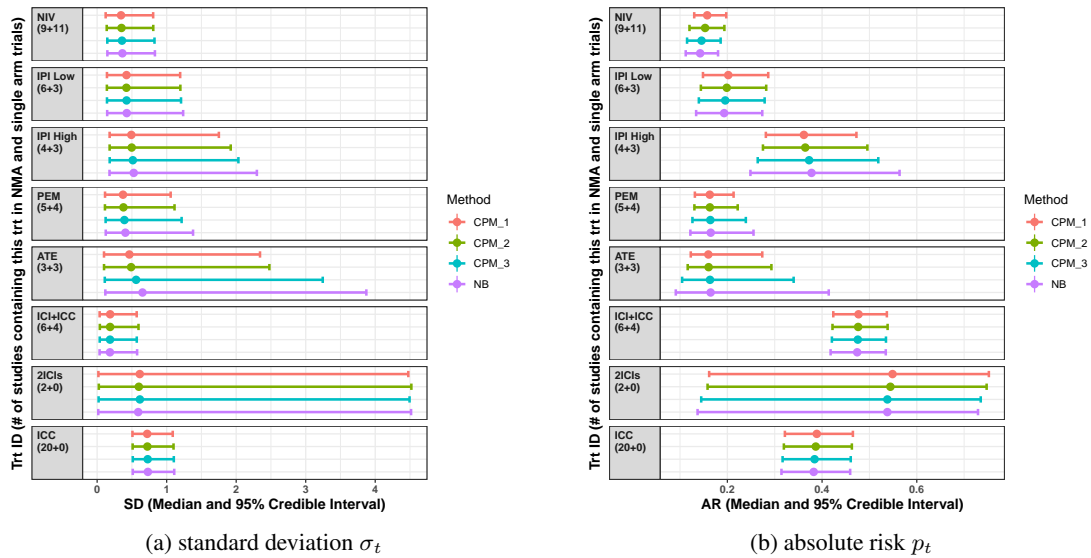

We then focused on choice of  $p^v$  for the CPV method. For the CPV1, CPV2, and CPV3 methods mentioned in Figure E2, we selected  $p^v = 0.9, 0.5,$  and  $0.1$  respectively. As we can see, the choice of  $p^v$  was less sensitive; any choice of  $0.1 \leq p^v \leq 0.5$  could be a reasonable selection for the CPV method.

FIG E2. Results for the dataset about safety of ICIs in cancer treatment: forest plot of posterior estimates of standard deviations  $\sigma_t$  and absolute risks  $p_t$  (posterior median with 95% credible interval). Different colors indicate different methods (FBV, CPV1, CPV2, CPV3, and NB). The y-axis represents regimen abbreviations, with the number of RCTs ( $B_t$ ) and single-arm trials ( $B_t^s$ ) in parentheses.

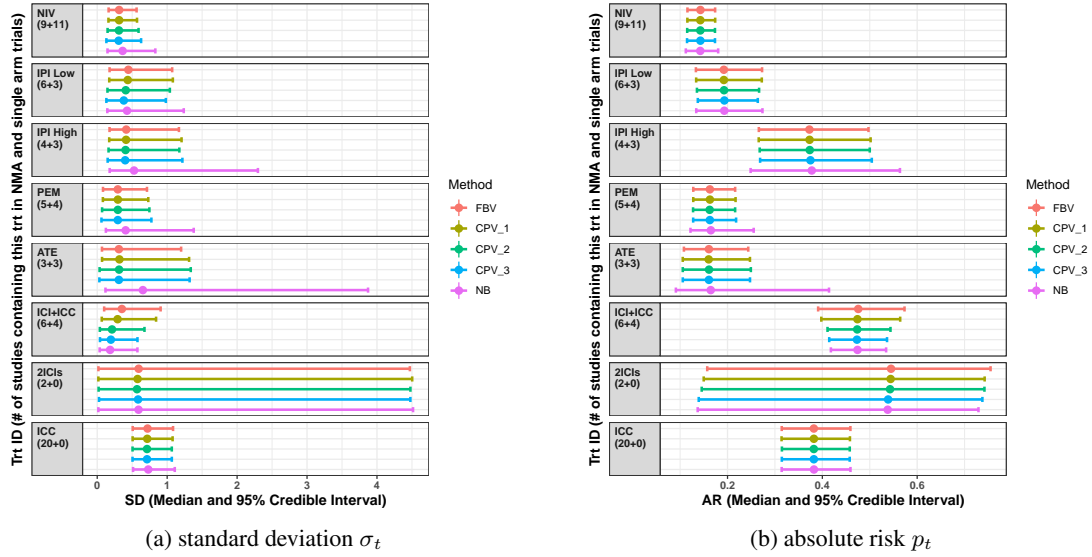

Last, we wanted to examine the influence of  $p^m$  and  $p^v$  in the DCP method. For the DCP1, DCP2, and DCP3 methods mentioned in Figure E3, we selected  $(p^m, p^v) = (0.9, 0.9)$ ,  $(0.5, 0.5)$ , and  $(0.1, 0.1)$  respectively. The results were a mix of the previous two sensitivity analyses.

FIG E3. Results for the dataset about safety of ICIs in cancer treatment: forest plot of posterior estimates of standard deviations  $\sigma_t$  and absolute risks  $p_t$  (posterior median with 95% credible interval). Different colors indicate different methods (FBMV, DCP1, DCP2, DCP3, and NB). The y-axis represents regimen abbreviations, with the number of RCTs ( $B_t$ ) and single-arm trials ( $B_t^s$ ) in parentheses.

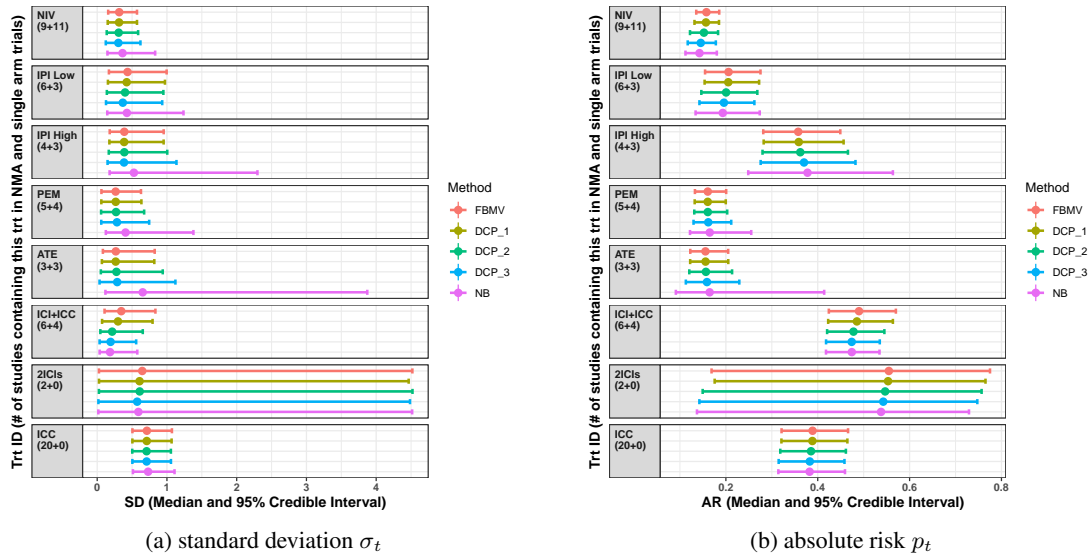

APPENDIX F: COMPARISON WITH CONTRAST-BASED METHODS

In this appendix, we compare our CPV and NB models with two contrast-based approaches in the case study:

- the contrast-based (CB) model with equal contrast heterogeneity variance, which is Model 1 in [White et al. \(2019\)](#);
- the CB with random study intercepts (CB-2), which is Model 3 in [White et al. \(2019\)](#).

Table F1 presents the results.

TABLE F1

*Analysis of ICI safety in cancer treatment: posterior medians and 95% credible intervals by 4 different models (NB, CPV, CB, and CB-2). The estimated parameters include absolute risk of events for the  $t^{\text{th}}$  treatment ( $p_t$ ), and log odds ratios  $LOR_{i,j}$  comparing treatments  $i$  and  $j$ . Treatment labels: 1) NIV; 2) IPI low; 3) IPI high; 4) PEM; 5) ATE; 6) ICI+ICC; 7) 2ICIs; and 8) ICC.*

|                   | NB                   | CPV                  | CB-2                 | CB                   |
|-------------------|----------------------|----------------------|----------------------|----------------------|
| LOR <sub>12</sub> | -0.36 (-0.88, 0.26)  | -0.35 (-0.82, 0.20)  | -0.27 (-0.77, 0.23)  | -0.40 (-1.20, 0.39)  |
| LOR <sub>13</sub> | -1.32 (-2.20, -0.46) | -1.30 (-1.87, -0.69) | -1.26 (-1.82, -0.68) | -1.48 (-2.37, -0.60) |
| LOR <sub>14</sub> | -0.17 (-0.72, 0.38)  | -0.16 (-0.57, 0.23)  | -0.11 (-0.59, 0.37)  | -0.23 (-0.97, 0.49)  |
| LOR <sub>15</sub> | -0.08 (-1.26, 1.66)  | -0.13 (-0.67, 0.55)  | 0.00 (-0.60, 0.60)   | -0.10 (-0.99, 0.80)  |
| LOR <sub>16</sub> | -1.74 (-2.16, -1.38) | -1.72 (-2.10, -1.36) | -1.86 (-2.34, -1.39) | -2.29 (-3.03, -1.57) |
| LOR <sub>17</sub> | -1.99 (-3.41, 2.23)  | -1.99 (-3.69, 2.00)  | -1.86 (-2.59, -1.14) | -1.86 (-2.91, -0.84) |
| LOR <sub>18</sub> | -1.33 (-1.73, -0.93) | -1.31 (-1.69, -0.93) | -1.30 (-1.60, -1.00) | -1.50 (-1.99, -1.02) |
| LOR <sub>23</sub> | -0.97 (-1.90, -0.11) | -0.95 (-1.63, -0.30) | -0.99 (-1.61, -0.37) | -1.07 (-1.80, -0.35) |
| LOR <sub>24</sub> | 0.19 (-0.52, 0.82)   | 0.18 (-0.40, 0.69)   | 0.16 (-0.46, 0.78)   | 0.17 (-0.73, 1.06)   |
| LOR <sub>25</sub> | 0.28 (-1.00, 2.04)   | 0.22 (-0.49, 0.98)   | 0.27 (-0.50, 1.00)   | 0.31 (-0.83, 1.45)   |
| LOR <sub>26</sub> | -1.38 (-2.00, -0.90) | -1.37 (-1.95, -0.89) | -1.59 (-2.23, -0.96) | -1.89 (-2.91, -0.88) |
| LOR <sub>27</sub> | -1.61 (-3.09, 2.55)  | -1.63 (-3.35, 2.32)  | -1.59 (-2.34, -0.86) | -1.46 (-2.39, -0.54) |
| LOR <sub>28</sub> | -0.97 (-1.61, -0.44) | -0.96 (-1.56, -0.45) | -1.03 (-1.57, -0.50) | -1.10 (-1.94, -0.25) |
| LOR <sub>34</sub> | 1.15 (0.21, 2.16)    | 1.13 (0.48, 1.76)    | 1.15 (0.45, 1.83)    | 1.25 (0.20, 2.26)    |
| LOR <sub>35</sub> | 1.25 (-0.23, 3.20)   | 1.17 (0.40, 2.01)    | 1.25 (0.45, 2.03)    | 1.38 (0.18, 2.61)    |
| LOR <sub>36</sub> | -0.43 (-1.28, 0.46)  | -0.43 (-1.04, 0.17)  | -0.61 (-1.31, 0.09)  | -0.81 (-1.93, 0.30)  |
| LOR <sub>37</sub> | -0.62 (-2.37, 3.62)  | -0.67 (-2.49, 3.32)  | -0.61 (-1.50, 0.27)  | -0.38 (-1.49, 0.73)  |
| LOR <sub>38</sub> | -0.01 (-0.88, 0.89)  | -0.01 (-0.65, 0.61)  | -0.04 (-0.66, 0.56)  | -0.02 (-0.98, 0.91)  |
| LOR <sub>45</sub> | 0.09 (-1.18, 1.88)   | 0.03 (-0.55, 0.75)   | 0.10 (-0.60, 0.80)   | 0.14 (-0.83, 1.11)   |
| LOR <sub>46</sub> | -1.57 (-2.12, -1.06) | -1.56 (-1.99, -1.13) | -1.75 (-2.33, -1.18) | -2.05 (-2.90, -1.24) |
| LOR <sub>47</sub> | -1.80 (-3.35, 2.41)  | -1.82 (-3.54, 2.17)  | -1.76 (-2.59, -0.93) | -1.62 (-2.80, -0.47) |
| LOR <sub>48</sub> | -1.16 (-1.69, -0.63) | -1.14 (-1.57, -0.71) | -1.20 (-1.64, -0.75) | -1.27 (-1.88, -0.66) |
| LOR <sub>56</sub> | -1.66 (-3.42, -0.48) | -1.59 (-2.30, -1.03) | -1.86 (-2.53, -1.16) | -2.19 (-3.15, -1.24) |
| LOR <sub>57</sub> | -1.87 (-4.16, 2.35)  | -1.84 (-3.65, 2.14)  | -1.86 (-2.77, -0.93) | -1.76 (-3.08, -0.44) |
| LOR <sub>58</sub> | -1.25 (-2.96, -0.09) | -1.18 (-1.85, -0.63) | -1.30 (-1.86, -0.71) | -1.40 (-2.16, -0.66) |
| LOR <sub>67</sub> | -0.24 (-1.72, 4.00)  | -0.26 (-2.00, 3.75)  | 0.00 (-0.85, 0.85)   | 0.43 (-0.83, 1.66)   |
| LOR <sub>68</sub> | 0.42 (0.04, 0.80)    | 0.42 (0.02, 0.80)    | 0.56 (0.13, 0.98)    | 0.79 (0.22, 1.35)    |
| LOR <sub>78</sub> | 0.65 (-3.56, 2.12)   | 0.67 (-3.33, 2.39)   | 0.56 (-0.20, 1.33)   | 0.35 (-0.74, 1.47)   |
| $p_1$             | 0.14 (0.11, 0.18)    | 0.14 (0.12, 0.17)    | 0.14 (0.11, 0.17)    |                      |
| $p_2$             | 0.19 (0.13, 0.27)    | 0.19 (0.14, 0.27)    | 0.18 (0.12, 0.26)    |                      |
| $p_3$             | 0.38 (0.25, 0.56)    | 0.37 (0.27, 0.50)    | 0.37 (0.25, 0.50)    |                      |
| $p_4$             | 0.16 (0.12, 0.26)    | 0.16 (0.13, 0.22)    | 0.15 (0.10, 0.22)    |                      |
| $p_5$             | 0.16 (0.09, 0.41)    | 0.16 (0.11, 0.25)    | 0.14 (0.09, 0.23)    |                      |
| $p_6$             | 0.47 (0.42, 0.53)    | 0.47 (0.41, 0.54)    | 0.51 (0.41, 0.62)    |                      |
| $p_7$             | 0.54 (0.14, 0.73)    | 0.54 (0.14, 0.75)    | 0.51 (0.34, 0.68)    |                      |
| $p_8$             | 0.38 (0.31, 0.46)    | 0.38 (0.31, 0.46)    | 0.37 (0.32, 0.44)    |                      |

## REFERENCES

- AMIN, A., LAWSON, D. H., SALAMA, A. K. S., KOON, H. B., GUTHRIE, T., THOMAS, S. S., O'DAY, S. J., SHAHEEN, M. F., ZHANG, B., FRANCIS, S. and HODI, F. S. (2016). Phase II study of vemurafenib followed by ipilimumab in patients with previously untreated BRAF-mutated metastatic melanoma. *Journal for ImmunoTherapy of Cancer* **4**.
- ASCIERTO, P. A., VECCHIO, M. D., ROBERT, C., MACKIEWICZ, A., CHIARION-SILENI, V., ARANCE, A., LEBBÉ, C., BASTHOLT, L., HAMID, O., RUTKOWSKI, P., MCNEIL, C., GARBE, C., LOQUAI, C., DRENO, B., THOMAS, L., GROB, J.-J., LISZKAY, G., NYAKAS, M., GUTZMER, R., PIKIEL, J., GRANGE, F., HOELLER, C., FERRARESI, V., SMYLIE, M., SCHADENDORF, D., MORTIER, L., SVANE, I. M., HENNICKEN, D., QURESHI, A. and MAIO, M. (2017). Ipilimumab 10 mg/kg versus ipilimumab 3 mg/kg in patients with unresectable or metastatic melanoma: a randomised, double-blind, multicentre, phase 3 trial. *The Lancet Oncology* **18** 611–622.
- BALAR, A. V., GALSKEY, M. D., ROSENBERG, J. E., POWLES, T., PETRYLAK, D. P., BELLMUNT, J., LORRIOT, Y., NECCHI, A., HOFFMAN-CENSITS, J., PEREZ-GRACIA, J. L., DAWSON, N. A., VAN DER HEIJDEN, M. S., DREICER, R., SRINIVAS, S., RETZ, M. M., JOSEPH, R. W., DRAKAKI, A., VAISHAMPAYAN, U. N., SRIDHAR, S. S., QUINN, D. I., DURÁN, I., SHAFFER, D. R., EIGL, B. J., GRIVAS, P. D., YU, E. Y., LI, S., KADEL, E. E., BOYD, Z., BOURGON, R., HEGDE, P. S., MARIATHASAN, S., THÅSTRÖM, A., ABIDOYE, O. O., FINE, G. D. and BAJORIN, D. F. (2017). Atezolizumab as first-line treatment in cisplatin-ineligible patients with locally advanced and metastatic urothelial carcinoma: a single-arm, multicentre, phase 2 trial. *The Lancet* **389** 67–76.
- BANG, Y.-J., CHO, J. Y., KIM, Y. H., KIM, J. W., BARTOLOMEO, M. D., AJANI, J. A., YAMAGUCHI, K., BALOGH, A., SANCHEZ, T. and MOEHLER, M. (2017). Efficacy of sequential ipilimumab monotherapy versus best supportive care for unresectable locally advanced/metastatic gastric or gastroesophageal junction cancer. *Clinical Cancer Research* **23** 5671–5678.
- BAUML, J., SEIWERT, T. Y., PFISTER, D. G., WORDEN, F., LIU, S. V., GILBERT, J., SABA, N. F., WEISS, J., WIRTH, L., SUKARI, A., KANG, H., GIBSON, M. K., MASSARELLI, E., POWELL, S., MEISTER, A., SHU, X., CHENG, J. D. and HADDAD, R. (2017). Pembrolizumab for platinum- and cetuximab-refractory head and neck cancer: results from a single-arm, phase II study. *Journal of Clinical Oncology* **35** 1542–1549.
- BELLMUNT, J., DE WIT, R., VAUGHN, D. J., FRADET, Y., LEE, J.-L., FONG, L., VOGELZANG, N. J., CLIMENT, M. A., PETRYLAK, D. P., CHOUERI, T. K., NECCHI, A., GERRITSEN, W., GURNEY, H., QUINN, D. I., CULINE, S., STERNBERG, C. N., MAI, Y., POEHLIN, C. H., PERINI, R. F. and BAJORIN, D. F. (2017). Pembrolizumab as second-line therapy for advanced urothelial carcinoma. *New England Journal of Medicine* **376** 1015–1026.
- BORGHAEI, H., PAZ-ARES, L., HORN, L., SPIGEL, D. R., STEINS, M., READY, N. E., CHOW, L. Q., VOKES, E. E., FELIP, E., HOLGADO, E., BARLESI, F., KOHLHÄUFL, M., ARRIETA, O., BURGIO, M. A., FAYETTE, J., LENA, H., PODDUBSKAYA, E., GERBER, D. E., GETTINGER, S. N., RUDIN, C. M., RIZVI, N., CRINÒ, L., BLUMENSCHN, G. R., ANTONIA, S. J., DORANGE, C., HARBISON, C. T., FINCKENSTEIN, F. G. and BRAHMER, J. R. (2015). Nivolumab versus docetaxel in advanced nonsquamous non-small-cell lung cancer. *New England Journal of Medicine* **373** 1627–1639.
- BRAHMER, J., RECKAMP, K. L., BAAS, P., CRINÒ, L., EBERHARDT, W. E. E., PODDUBSKAYA, E., ANTONIA, S., PLUZANSKI, A., VOKES, E. E., HOLGADO, E., WATERHOUSE, D., READY, N., GAINOR, J., FRONTIERA, O. A., HAVEL, L., STEINS, M., GARASSINO, M. C., AERTS, J. G., DOMINE, M., PAZ-ARES, L., RECK, M., BAUDELET, C., HARBISON, C. T., LESTINI, B. and SPIGEL, D. R. (2015). Nivolumab versus docetaxel in advanced squamous-cell non-small-cell lung cancer. *New England Journal of Medicine* **373** 123–135.
- CARBONE, D. P., RECK, M., PAZ-ARES, L., CREELAN, B., HORN, L., STEINS, M., FELIP, E., VAN DEN HEUVEL, M. M., CIULEANU, T.-E., BADIN, F., READY, N., HILTERMANN, T. J. N., NAIR, S., JUERGENSEN, R., PETERS, S., MINENZA, E., WRANGLE, J. M., RODRIGUEZ-ABREU, D., BORGHAEI, H., BLUMENSCHN, G. R., VILLARUZ, L. C., HAVEL, L., KREJCI, J., JAIME, J. C., CHANG, H., GEESE, W. J., BHAGAVATHEESWARAN, P., CHEN, A. C. and SOCINSKI, M. A. (2017). First-line nivolumab in stage IV or recurrent non-small-cell lung cancer. *New England Journal of Medicine* **376** 2415–2426.
- FEHRENBACHER, L., SPIRA, A., BALLINGER, M., KOWANETZ, M., VANSTEENKISTE, J., MAZIERES, J., PARK, K., SMITH, D., ARTAL-CORTES, A., LEWANSKI, C., BRAITEH, F., WATERKAMP, D., HE, P., ZOU, W., CHEN, D. S., YI, J., SANDLER, A. and RITTMAYER, A. (2016). Atezolizumab versus docetaxel for patients with previously treated non-small-cell lung cancer (POPLAR): a multicentre, open-label, phase 2 randomised controlled trial. *The Lancet* **387** 1837–1846.
- FERRIS, R. L., BLUMENSCHN, G., FAYETTE, J., GUIGAY, J., COLEVAS, A. D., LICITRA, L., HARRINGTON, K., KASPER, S., VOKES, E. E., EVEN, C., WORDEN, F., SABA, N. F., DOCAMPO, L. C. I., HADDAD, R., RORDORF, T., KIYOTA, N., TAHARA, M., MONGA, M., LYNCH, M., GEESE, W. J., KOPIT, J.,

- SHAW, J. W. and GILLISON, M. L. (2016). Nivolumab for recurrent squamous-cell carcinoma of the head and neck. *New England Journal of Medicine* **375** 1856–1867.
- GIACCONE, G., KIM, C., THOMPSON, J., MCGUIRE, C., KALLAKURY, B., CHAHINE, J. J., MANNING, M., MOGG, R., BLUMENSCHNEIN, W. M., TAN, M. T., SUBRAMANIAM, D. S., LIU, S. V., KAPLAN, I. M. and MCCUTCHEON, J. N. (2018). Pembrolizumab in patients with thymic carcinoma: a single-arm, single-centre, phase 2 study. *The Lancet Oncology* **19** 347–355.
- GIACOMO, A. M. D., ASCIERTO, P. A., PILLA, L., SANTINAMI, M., FERRUCCI, P. F., GIANNARELLI, D., MARASCO, A., RIVOLTINI, L., SIMEONE, E., NICOLETTI, S. V., FONSAATI, E., ANNESI, D., QUEIROLO, P., TESTORI, A., RIDOLFI, R., PARMIANI, G. and MAIO, M. (2012). Ipilimumab and fote-mustine in patients with advanced melanoma (NIBIT-M1): an open-label, single-arm phase 2 trial. *The Lancet Oncology* **13** 879–886.
- GOLDBERG, S. B., GETTINGER, S. N., MAHAJAN, A., CHIANG, A. C., HERBST, R. S., SZNOL, M., TSIOURIS, A. J., COHEN, J., VORTMEYER, A., JILAVEANU, L., YU, J., HEGDE, U., SPEAKER, S., MADURA, M., RALABATE, A., RIVERA, A., ROWEN, E., GERRISH, H., YAO, X., CHIANG, V. and KLUGER, H. M. (2016). Pembrolizumab for patients with melanoma or non-small-cell lung cancer and untreated brain metastases: early analysis of a non-randomised, open-label, phase 2 trial. *The Lancet Oncology* **17** 976–983.
- GOVINDAN, R., SZCZESNA, A., AHN, M.-J., SCHNEIDER, C.-P., MELLA, P. F. G., BARLESI, F., HAN, B., GANEA, D. E., PAWEL, J. V., VLADIMIROV, V., FADEEVA, N., LEE, K. H., KURATA, T., ZHANG, L., TAMURA, T., POSTMUS, P. E., JASSEM, J., O'BYRNE, K., KOPIT, J., LI, M., TSCHAIKA, M. and RECK, M. (2017). Phase III trial of ipilimumab combined with paclitaxel and carboplatin in advanced squamous non-small-cell lung cancer. *Journal of Clinical Oncology* **35** 3449–3457.
- HAAG, G. M., ZOERNIG, I., HASSEL, J. C., HALAMA, N., DICK, J., LANG, N., PODOLA, L., FUNK, J., ZIEGELMEIER, C., JUENGER, S., BUCUR, M., UMANSKY, L., FALK, C. S., FREITAG, A., KARAPANAGIOTOU-SCHENKEL, I., BECKHOVE, P., ENK, A. and JAEGER, D. (2018). Phase II trial of ipilimumab in melanoma patients with preexisting humoral immune response to NY-ESO-1. *European Journal of Cancer* **90** 122–129.
- HAMANISHI, J., MANDAI, M., IKEDA, T., MINAMI, M., KAWAGUCHI, A., MURAYAMA, T., KANAI, M., MORI, Y., MATSUMOTO, S., CHIKUMA, S., MATSUMURA, N., ABIKO, K., BABA, T., YAMAGUCHI, K., UEDA, A., HOSOE, Y., MORITA, S., YOKODE, M., SHIMIZU, A., HONJO, T. and KONISHI, I. (2015). Safety and antitumor activity of anti-PD-1 antibody, nivolumab, in patients with platinum-resistant ovarian cancer. *Journal of Clinical Oncology* **33** 4015–4022.
- HAMID, O., SCHMIDT, H., NISSAN, A., RIDOLFI, L., AAMDAL, S., HANSSON, J., GUIDA, M., HYAMS, D. M., GÓMEZ, H., BASTHOLT, L., CHASALOW, S. D. and BERMAN, D. (2011). A prospective phase II trial exploring the association between tumor microenvironment biomarkers and clinical activity of ipilimumab in advanced melanoma. *Journal of Translational Medicine* **9**.
- HERBST, R. S., BAAS, P., KIM, D.-W., FELIP, E., PÉREZ-GRACIA, J. L., HAN, J.-Y., MOLINA, J., KIM, J.-H., ARVIS, C. D., AHN, M.-J., MAJEM, M., FIDLER, M. J., DE CASTRO, G., GARRIDO, M., LUBINIECKI, G. M., SHENTU, Y., IM, E., DOLLED-FILHART, M. and GARON, E. B. (2016). Pembrolizumab versus docetaxel for previously treated, PD-L1-positive, advanced non-small-cell lung cancer (KEYNOTE-010): a randomised controlled trial. *The Lancet* **387** 1540–1550.
- HERSH, E. M., O'DAY, S. J., POWDERLY, J., KHAN, K. D., PAVLICK, A. C., CRANMER, L. D., SAM-LOWSKI, W. E., NICHOL, G. M., YELLIN, M. J. and WEBER, J. S. (2010). A phase II multicenter study of ipilimumab with or without dacarbazine in chemotherapy-naïve patients with advanced melanoma. *Investigational New Drugs* **29** 489–498.
- HIDA, T., NISHIO, M., NOGAMI, N., OHE, Y., NOKIHARA, H., SAKAI, H., SATOUCHI, M., NAKAGAWA, K., TAKENOYAMA, M., ISOBE, H., FUJITA, S., TANAKA, H., MINATO, K., TAKAHASHI, T., MAEMONDO, M., TAKEDA, K., SAKA, H., GOTO, K., ATAGI, S., HIRASHIMA, T., SUMIYOSHI, N. and TAMURA, T. (2017). Efficacy and safety of nivolumab in Japanese patients with advanced or recurrent squamous non-small cell lung cancer. *Cancer Science* **108** 1000–1006.
- HODI, F. S., CHESNEY, J., PAVLICK, A. C., ROBERT, C., GROSSMANN, K. F., MCDERMOTT, D. F., LINETTE, G. P., MEYER, N., GIGUERE, J. K., AGARWALA, S. S., SHAHEEN, M., ERNSTOFF, M. S., MINOR, D. R., SALAMA, A. K., TAYLOR, M. H., OTT, P. A., HORAK, C., GAGNIER, P., JIANG, J., WOLCHOK, J. D. and POSTOW, M. A. (2016). Combined nivolumab and ipilimumab versus ipilimumab alone in patients with advanced melanoma: 2-year overall survival outcomes in a multicentre, randomised, controlled, phase 2 trial. *The Lancet Oncology* **17** 1558–1568.
- KANG, Y.-K., BOKU, N., SATOH, T., RYU, M.-H., CHAO, Y., KATO, K., CHUNG, H. C., CHEN, J.-S., MURO, K., KANG, W. K., YEH, K.-H., YOSHIKAWA, T., OH, S. C., BAI, L.-Y., TAMURA, T., LEE, K.-W., HAMAMOTO, Y., KIM, J. G., CHIN, K., OH, D.-Y., MINASHI, K., CHO, J. Y., TSUDA, M. and CHEN, L.-T.

- (2017). Nivolumab in patients with advanced gastric or gastro-oesophageal junction cancer refractory to, or intolerant of, at least two previous chemotherapy regimens (ONO-4538-12, ATTRACTION-2): a randomised, double-blind, placebo-controlled, phase 3 trial. *The Lancet* **390** 2461–2471.
- KUDO, T., HAMAMOTO, Y., KATO, K., URA, T., KOJIMA, T., TSUSHIMA, T., HIRONAKA, S., HARA, H., SATOH, T., IWASA, S., MURO, K., YASUI, H., MINASHI, K., YAMAGUCHI, K., OHTSU, A., DOKI, Y. and KITAGAWA, Y. (2017). Nivolumab treatment for oesophageal squamous-cell carcinoma: an open-label, multicentre, phase 2 trial. *The Lancet Oncology* **18** 631–639.
- KWON, E. D., DRAKE, C. G., SCHER, H. I., FIZAZI, K., BOSSI, A., VAN DEN EERTWEGH, A. J. M., KRAINER, M., HOUEDE, N., SANTOS, R., MAHAMMEDI, H., NG, S., MAIO, M., FRANKE, F. A., SUNDAR, S., AGARWAL, N., BERGMAN, A. M., CIULEANU, T. E., KORBENFELD, E., SENDELØV, L., HANSEN, S., LOGOTHETIS, C., BEER, T. M., MCHENRY, M. B., GAGNIER, P., LIU, D. and GERRITSEN, W. R. (2014). Ipilimumab versus placebo after radiotherapy in patients with metastatic castration-resistant prostate cancer that had progressed after docetaxel chemotherapy (CA184-043): a multicentre, randomised, double-blind, phase 3 trial. *The Lancet Oncology* **15** 700–712.
- LANGER, C. J., GADGEEL, S. M., BORGHAEI, H., PAPADIMITRAKOPOULOU, V. A., PATNAIK, A., POWELL, S. F., GENTZLER, R. D., MARTINS, R. G., STEVENSON, J. P., JALAL, S. I., PANWALKAR, A., YANG, J. C.-H., GUBENS, M., SEQUIST, L. V., AWAD, M. M., FIORE, J., GE, Y., RAFTOPOULOS, H. and GANDHI, L. (2016). Carboplatin and pemetrexed with or without pembrolizumab for advanced, non-squamous non-small-cell lung cancer: a randomised, phase 2 cohort of the open-label KEYNOTE-021 study. *The Lancet Oncology* **17** 1497–1508.
- LARKIN, J., CHIARION-SILENI, V., GONZALEZ, R., GROB, J. J., COWEY, C. L., LAO, C. D., SCHADENDORF, D., DUMMER, R., SMYLLIE, M., RUTKOWSKI, P., FERRUCCI, P. F., HILL, A., WAGSTAFF, J., CARLINO, M. S., HAANEN, J. B., MAIO, M., MARQUEZ-RODAS, I., MCARTHUR, G. A., ASCIERTO, P. A., LONG, G. V., CALLAHAN, M. K., POSTOW, M. A., GROSSMANN, K., SZNOL, M., DRENO, B., BASTHOLT, L., YANG, A., ROLLIN, L. M., HORAK, C., HODI, F. S. and WOLCHOK, J. D. (2015). Combined nivolumab and ipilimumab or monotherapy in untreated melanoma. *New England Journal of Medicine* **373** 23–34.
- LARKIN, J., MINOR, D., D'ANGELO, S., NEYNS, B., SMYLLIE, M., MILLER, W. H., GUTZMER, R., LINETTE, G., CHMIELOWSKI, B., LAO, C. D., LORIGAN, P., GROSSMANN, K., HASSEL, J. C., SZNOL, M., DAUD, A., SOSMAN, J., KHUSHALANI, N., SCHADENDORF, D., HOELLER, C., WALKER, D., KONG, G., HORAK, C. and WEBER, J. (2018). Overall survival in patients With advanced melanoma who received nivolumab Versus investigator's choice chemotherapy in CheckMate 037: a randomized, controlled, open-label phase III trial. *Journal of Clinical Oncology* **36** 383–390.
- LYNCH, T. J., BONDARENKO, I., LUFT, A., SERWATOWSKI, P., BARLESI, F., CHACKO, R., SEBASTIAN, M., NEAL, J., LU, H., CUILLEROT, J.-M. and RECK, M. (2012). Ipilimumab in combination With paclitaxel and carboplatin as first-line treatment in stage IIIB/IV non-small-cell lung cancer: results from a randomized, double-blind, multicenter phase II study. *Journal of Clinical Oncology* **30** 2046–2054.
- MAIO, M., GROB, J.-J., AAMDAL, S., BONDARENKO, I., ROBERT, C., THOMAS, L., GARBE, C., CHIARION-SILENI, V., TESTORI, A., CHEN, T.-T., TSCHAIKA, M. and WOLCHOK, J. D. (2015). Five-year survival rates for treatment-naïve patients with advanced melanoma who received ipilimumab plus dacarbazine in a phase III trial. *Journal of Clinical Oncology* **33** 1191–1196.
- MARUYAMA, D., HATAKE, K., KINOSHITA, T., FUKUHARA, N., CHOI, I., TANIWAKI, M., ANDO, K., TERUI, Y., HIGUCHI, Y., ONISHI, Y., ABE, Y., KOBAYASHI, T., SHIRASUGI, Y. and TOBINAI, K. (2017). Multicenter phase II study of nivolumab in Japanese patients with relapsed or refractory classical Hodgkin lymphoma. *Cancer Science* **108** 1007–1012.
- MOTZER, R. J., RINI, B. I., MCDERMOTT, D. F., REDMAN, B. G., KUZEL, T. M., HARRISON, M. R., VAISHAMPAYAN, U. N., DRABKIN, H. A., GEORGE, S., LOGAN, T. F., MARGOLIN, K. A., PLIMACK, E. R., LAMBERT, A. M., WAXMAN, I. M. and HAMMERS, H. J. (2015a). Nivolumab for metastatic renal cell carcinoma: results of a randomized phase II trial. *Journal of Clinical Oncology* **33** 1430–1437.
- MOTZER, R. J., ESCUDIER, B., MCDERMOTT, D. F., GEORGE, S., HAMMERS, H. J., SRINIVAS, S., TYKODI, S. S., SOSMAN, J. A., PROCOPIO, G., PLIMACK, E. R., CASTELLANO, D., CHOUERI, T. K., GURNEY, H., DONSKOV, F., BONO, P., WAGSTAFF, J., GAULER, T. C., UEDA, T., TOMITA, Y., SCHUTZ, F. A., KOLLMANNNSBERGER, C., LARKIN, J., RAVAUD, A., SIMON, J. S., XU, L.-A., WAXMAN, I. M. and SHARMA, P. (2015b). Nivolumab versus everolimus in advanced renal-cell carcinoma. *New England Journal of Medicine* **373** 1803–1813.
- NGHIEM, P. T., BHATIA, S., LIPSON, E. J., KUDCHADKAR, R. R., MILLER, N. J., ANNAMALAI, L., BERRY, S., CHARTASH, E. K., DAUD, A., FLING, S. P., FRIEDLANDER, P. A., KLUGER, H. M., KOHRT, H. E., LUNDGREN, L., MARGOLIN, K., MITCHELL, A., OLENCKI, T., PARDOLL, D. M., REDDY, S. A., SHANTHA, E. M., SHARFMAN, W. H., SHARON, E., SHEMANSKI, L. R., SHINOHARA, M. M., SUNSHINE, J. C., TAUBE, J. M., THOMPSON, J. A., TOWNSON, S. M., YEARLEY, J. H.,

- TOPALIAN, S. L. and CHEEVER, M. A. (2016). PD-1 blockade with pembrolizumab in advanced merkel-cell carcinoma. *New England Journal of Medicine* **374** 2542–2552.
- NISHIO, M., HIDA, T., ATAGI, S., SAKAI, H., NAKAGAWA, K., TAKAHASHI, T., NOGAMI, N., SAKA, H., TAKENOYAMA, M., MAEMONDO, M., OHE, Y., NOKIHARA, H., HIRASHIMA, T., TANAKA, H., FUJITA, S., TAKEDA, K., GOTO, K., SATOUCHI, M., ISOBE, H., MINATO, K., SUMIYOSHI, N. and TAMURA, T. (2017). Multicentre phase II study of nivolumab in Japanese patients with advanced or recurrent non-squamous non-small cell lung cancer. *ESMO Open* **2** e000108.
- O'DAY, S. J., MAIO, M., CHIARION-SILENI, V., GAJEWSKI, T. F., PEHAMBERGER, H., BONDARENKO, I. N., QUEIROLO, P., LUNDGREN, L., MIKHAILOV, S., ROMAN, L., VERSCHRAEGEN, C., HUMPHREY, R., IBRAHIM, R., DE PRIL, V., HOOS, A. and WOLCHOK, J. D. (2010). Efficacy and safety of ipilimumab monotherapy in patients with pretreated advanced melanoma: a multicenter single-arm phase II study. *Annals of Oncology* **21** 1712–1717.
- OVERMAN, M. J., LONARDI, S., WONG, K. Y. M., LENZ, H.-J., GELSOMINO, F., AGLIETTA, M., MORSE, M. A., CUTSEM, E. V., MCDERMOTT, R., HILL, A., SAWYER, M. B., HENDLISZ, A., NEYNS, B., SVRCEK, M., MOSS, R. A., LEDEINE, J.-M., CAO, Z. A., KAMBLE, S., KOPETZ, S. and ANDRÉ, T. (2018). Durable clinical benefit with nivolumab plus ipilimumab in DNA mismatch repair-deficient/microsatellite instability-high metastatic colorectal cancer. *Journal of Clinical Oncology* **36** 773–779.
- PETERS, S., GETTINGER, S., JOHNSON, M. L., JÄNNE, P. A., GARASSINO, M. C., CHRISTOPH, D., TOH, C. K., RIZVI, N. A., CHAFT, J. E., COSTA, E. C., PATEL, J. D., CHOW, L. Q. M., KOCZY-WAS, M., HO, C., FRÜH, M., VAN DEN HEUVEL, M., ROTHENSTEIN, J., RECK, M., PAZ-ARES, L., SHEPHERD, F. A., KURATA, T., LI, Z., QIU, J., KOWANETZ, M., MOCCI, S., SHANKAR, G., SANDLER, A. and FELIP, E. (2017). Phase II trial of atezolizumab as first-line or subsequent therapy for patients with programmed death-ligand 1-selected advanced non-small-cell lung cancer (BIRCH). *Journal of Clinical Oncology* **35** 2781–2789.
- POSTOW, M. A., CHESNEY, J., PAVLICK, A. C., ROBERT, C., GROSSMANN, K., MCDERMOTT, D., LINETTE, G. P., MEYER, N., GIGUERE, J. K., AGARWALA, S. S., SHAHEEN, M., ERNSTOFF, M. S., MINOR, D., SALAMA, A. K., TAYLOR, M., OTT, P. A., ROLLIN, L. M., HORAK, C., GAGNIER, P., WOLCHOK, J. D. and HODI, F. S. (2015). Nivolumab and ipilimumab versus ipilimumab in untreated melanoma. *New England Journal of Medicine* **372** 2006–2017.
- POWLES, T., DURÁN, I., VAN DER HEIJDEN, M. S., LORIOT, Y., VOGELZANG, N. J., GIORGI, U. D., OUDARD, S., RETZ, M. M., CASTELLANO, D., BAMIAS, A., FLÉCHON, A., GRAVIS, G., HUSSAIN, S., TAKANO, T., LENG, N., KADEL, E. E., BANCHEREAU, R., HEGDE, P. S., MARIATHASAN, S., CUI, N., SHEN, X., DERLETH, C. L., GREEN, M. C. and RAVAUD, A. (2018). Atezolizumab versus chemotherapy in patients with platinum-treated locally advanced or metastatic urothelial carcinoma (IMvigor211): a multicentre, open-label, phase 3 randomised controlled trial. *The Lancet* **391** 748–757.
- RECK, M., BONDARENKO, I., LUFT, A., SERWATOWSKI, P., BARLESI, F., CHACKO, R., SEBASTIAN, M., LU, H., CULLEROT, J. M. and LYNCH, T. J. (2012). Ipilimumab in combination with paclitaxel and carboplatin as first-line therapy in extensive-disease-small-cell lung cancer: results from a randomized, double-blind, multicenter phase 2 trial†. *Annals of Oncology* **24** 75–83.
- RECK, M., RODRÍGUEZ-ABREU, D., ROBINSON, A. G., HUI, R., CSÓSZI, T., FÜLÖP, A., GOTTFRIED, M., PELED, N., TAFRESHI, A., CUFFE, S., O'BRIEN, M., RAO, S., HOTTA, K., LEIBY, M. A., LUBINIECKI, G. M., SHENTU, Y., RANGWALA, R. and BRAHMER, J. R. (2016a). Pembrolizumab versus chemotherapy for PD-L1-positive non-small-cell lung cancer. *New England Journal of Medicine* **375** 1823–1833.
- RECK, M., LUFT, A., SZCZESNA, A., HAVEL, L., KIM, S.-W., AKERLEY, W., PIETANZA, M. C., LONG WU, Y., ZIELINSKI, C., THOMAS, M., FELIP, E., GOLD, K., HORN, L., AERTS, J., NAKAGAWA, K., LORIGAN, P., PIETERS, A., SANCHEZ, T. K., FAIRCHILD, J. and SPIGEL, D. (2016b). Phase III randomized trial of ipilimumab plus etoposide and platinum versus placebo plus etoposide and platinum in extensive-stage small-cell lung cancer. *Journal of Clinical Oncology* **34** 3740–3748.
- RIBAS, A., KEFFORD, R., MARSHALL, M. A., PUNT, C. J. A., HAANEN, J. B., MARMOL, M., GARBE, C., GOGAS, H., SCHACHTER, J., LINETTE, G., LORIGAN, P., KENDRA, K. L., MAIO, M., TREFZER, U., SMYLLIE, M., MCARTHUR, G. A., DRENO, B., NATHAN, P. D., MACKIEWICZ, J., KIRKWOOD, J. M., GOMEZ-NAVARRO, J., HUANG, B., PAVLOV, D. and HAUSCHILD, A. (2013). Phase III randomized clinical trial comparing tremelimumab with standard-of-care chemotherapy in patients with advanced melanoma. *Journal of Clinical Oncology* **31** 616–622.
- RIBAS, A., PUZANOV, I., DUMMER, R., SCHADENDORF, D., HAMID, O., ROBERT, C., HODI, F. S., SCHACHTER, J., PAVLICK, A. C., LEWIS, K. D., CRANMER, L. D., BLANK, C. U., O'DAY, S. J., ASCIERTO, P. A., SALAMA, A. K. S., MARGOLIN, K. A., LOQUAI, C., EIGENTLER, T. K., GANGADHAR, T. C., CARLINO, M. S., AGARWALA, S. S., MOSCHOS, S. J., SOSMAN, J. A., GOLDINGER, S. M.,

- SHAPIRA-FROMMER, R., GONZALEZ, R., KIRKWOOD, J. M., WOLCHOK, J. D., EGGERMONT, A., LI, X. N., ZHOU, W., ZERNHELT, A. M., LIS, J., EBBINGHAUS, S., KANG, S. P. and DAUD, A. (2015). Pembrolizumab versus investigator-choice chemotherapy for ipilimumab-refractory melanoma (KEYNOTE-002): a randomised, controlled, phase 2 trial. *The Lancet Oncology* **16** 908–918.
- RITTMAYER, A., BARLESI, F., WATERKAMP, D., PARK, K., CIARDIELLO, F., VON PAWEL, J., GADGEEL, S. M., HIDA, T., KOWALSKI, D. M., DOLS, M. C., CORTINOVIS, D. L., LEACH, J., POLIKOFF, J., BARRIOS, C., KABBINAVAR, F., FRONTERA, O. A., MARINIS, F. D., TURNA, H., LEE, J.-S., BALLINGER, M., KOWANETZ, M., HE, P., CHEN, D. S., SANDLER, A. and GANDARA, D. R. (2017). Atezolizumab versus docetaxel in patients with previously treated non-small-cell lung cancer (OAK): a phase 3, open-label, multicentre randomised controlled trial. *The Lancet* **389** 255–265.
- RIZVI, N. A., MAZIÈRES, J., PLANCHARD, D., STINCHCOMBE, T. E., DY, G. K., ANTONIA, S. J., HORN, L., LENA, H., MINENZA, E., MENNECIER, B., OTTERSON, G. A., CAMPOS, L. T., GANDARA, D. R., LEVY, B. P., NAIR, S. G., ZALCMAN, G., WOLF, J., SOUQUET, P.-J., BALDINI, E., CAPPUZZO, F., CHOUAID, C., DOWLATI, A., SANBORN, R., LOPEZ-CHAVEZ, A., GROHE, C., HUBER, R. M., HARBISON, C. T., BAUDET, C., LESTINI, B. J. and RAMALINGAM, S. S. (2015). Activity and safety of nivolumab, an anti-PD-1 immune checkpoint inhibitor, for patients with advanced, refractory squamous non-small-cell lung cancer (CheckMate 063): a phase 2, single-arm trial. *The Lancet Oncology* **16** 257–265.
- ROBERT, C., THOMAS, L., BONDARENKO, I., O'DAY, S., WEBER, J., GARBE, C., LEBBE, C., BAURAIN, J.-F., TESTORI, A., GROB, J.-J., DAVIDSON, N., RICHARDS, J., MAIO, M., HAUSCHILD, A., MILLER, W. H., GASCON, P., LOTEM, M., HARMANKAYA, K., IBRAHIM, R., FRANCIS, S., CHEN, T.-T., HUMPHREY, R., HOOS, A. and WOLCHOK, J. D. (2011). Ipilimumab plus dacarbazine for previously untreated metastatic melanoma. *New England Journal of Medicine* **364** 2517–2526.
- ROBERT, C., SCHACHTER, J., LONG, G. V., ARANCE, A., GROB, J. J., MORTIER, L., DAUD, A., CARLINO, M. S., MCNEIL, C., LOTEM, M., LARKIN, J., LORIGAN, P., NEYNS, B., BLANK, C. U., HAMID, O., MATEUS, C., SHAPIRA-FROMMER, R., KOSH, M., ZHOU, H., IBRAHIM, N., EBBINGHAUS, S. and RIBAS, A. (2015a). Pembrolizumab versus ipilimumab in advanced melanoma. *New England Journal of Medicine* **372** 2521–2532.
- ROBERT, C., LONG, G. V., BRADY, B., DUTRIAUX, C., MAIO, M., MORTIER, L., HASSEL, J. C., RUTKOWSKI, P., MCNEIL, C., KALINKA-WARZOCHA, E., SAVAGE, K. J., HERNBERG, M. M., LEBBÉ, C., CHARLES, J., MIHALCIOIU, C., CHIARION-SILENI, V., MAUCH, C., COGNETTI, F., ARANCE, A., SCHMIDT, H., SCHADENDORF, D., GOGAS, H., LUNDGREN-ERIKSSON, L., HORAK, C., SHARKEY, B., WAXMAN, I. M., ATKINSON, V. and ASCIERTO, P. A. (2015b). Nivolumab in previously untreated melanoma without BRAF mutation. *New England Journal of Medicine* **372** 320–330.
- ROSENBERG, J. E., HOFFMAN-CENSITS, J., POWLES, T., VAN DER HEIJDEN, M. S., BALAR, A. V., NECCHI, A., DAWSON, N., O'DONNELL, P. H., BALMANOUKIAN, A., LORIOT, Y., SRINIVAS, S., RETZ, M. M., GRIVAS, P., JOSEPH, R. W., GALSKY, M. D., FLEMING, M. T., PETRYLAK, D. P., PEREZ-GRACIA, J. L., BURRIS, H. A., CASTELLANO, D., CANIL, C., BELLMUNT, J., BAJORIN, D., NICKLES, D., BOURGON, R., FRAMPTON, G. M., CUI, N., MARIATHASAN, S., ABIDOYE, O., FINE, G. D. and DREICER, R. (2016). Atezolizumab in patients with locally advanced and metastatic urothelial carcinoma who have progressed following treatment with platinum-based chemotherapy: a single-arm, multicentre, phase 2 trial. *The Lancet* **387** 1909–1920.
- SCHACHTER, J., RIBAS, A., LONG, G. V., ARANCE, A., GROB, J.-J., MORTIER, L., DAUD, A., CARLINO, M. S., MCNEIL, C., LOTEM, M., LARKIN, J., LORIGAN, P., NEYNS, B., BLANK, C., PETRELLA, T. M., HAMID, O., ZHOU, H., EBBINGHAUS, S., IBRAHIM, N. and ROBERT, C. (2017). Pembrolizumab versus ipilimumab for advanced melanoma: final overall survival results of a multicentre, randomised, open-label phase 3 study (KEYNOTE-006). *The Lancet* **390** 1853–1862.
- SHARMA, P., RETZ, M., SIEFKER-RADTKE, A., BARON, A., NECCHI, A., BEDKE, J., PLIMACK, E. R., VAENA, D., GRIMM, M.-O., BRACARDA, S., ARRANZ, J. Á., PAL, S., OHYAMA, C., SACI, A., QU, X., LAMBERT, A., KRISHNAN, S., AZRILEVICH, A. and GALSKY, M. D. (2017). Nivolumab in metastatic urothelial carcinoma after platinum therapy (CheckMate 275): a multicentre, single-arm, phase 2 trial. *The Lancet Oncology* **18** 312–322.
- WEBER, J. S., D'ANGELO, S. P., MINOR, D., HODI, F. S., GUTZMER, R., NEYNS, B., HOELLER, C., KHUSHALANI, N. I., MILLER, W. H., LAO, C. D., LINETTE, G. P., THOMAS, L., LORIGAN, P., GROSSMANN, K. F., HASSEL, J. C., MAIO, M., SZNOL, M., ASCIERTO, P. A., MOHR, P., CHMIELOWSKI, B., BRYCE, A., SVANE, I. M., GROB, J.-J., KRACKHARDT, A. M., HORAK, C., LAMBERT, A., YANG, A. S. and LARKIN, J. (2015). Nivolumab versus chemotherapy in patients with advanced melanoma who progressed after anti-CTLA-4 treatment (CheckMate 037): a randomised, controlled, open-label, phase 3 trial. *The Lancet Oncology* **16** 375–384.



- WEBER, J., MANDALA, M., VECCHIO, M. D., GOGAS, H. J., ARANCE, A. M., COWEY, C. L., DALLE, S., SCHENKER, M., CHIARION-SILENI, V., MARQUEZ-RODAS, I., GROB, J.-J., BUTLER, M. O., MIDDLTON, M. R., MAIO, M., ATKINSON, V., QUEIROLO, P., GONZALEZ, R., KUDCHADKAR, R. R., SMYLYE, M., MEYER, N., MORTIER, L., ATKINS, M. B., LONG, G. V., BHATIA, S., LEBBÉ, C., RUTKOWSKI, P., YOKOTA, K., YAMAZAKI, N., KIM, T. M., DE PRIL, V., SABATER, J., QURESHI, A., LARKIN, J. and ASCIERTO, P. A. (2017). Adjuvant nivolumab versus ipilimumab in resected stage III or IV melanoma. *New England Journal of Medicine* **377** 1824–1835.
- WHITE, I. R., TURNER, R. M., KARAHALIOS, A. and SALANTI, G. (2019). A comparison of arm-based and contrast-based models for network meta-analysis. *Statistics in Medicine* **38** 5197–5213.
- WOLCHOK, J. D., NEYNS, B., LINETTE, G., NEGRIER, S., LUTZKY, J., THOMAS, L., WATERFIELD, W., SCHADENDORF, D., SMYLYE, M., GUTHRIE, T., GROB, J.-J., CHESNEY, J., CHIN, K., CHEN, K., HOOS, A., O'DAY, S. J. and LEBBÉ, C. (2010). Ipilimumab monotherapy in patients with pretreated advanced melanoma: a randomised, double-blind, multicentre, phase 2, dose-ranging study. *The Lancet Oncology* **11** 155–164.
- WOLCHOK, J. D., CHIARION-SILENI, V., GONZALEZ, R., RUTKOWSKI, P., GROB, J.-J., COWEY, C. L., LAO, C. D., WAGSTAFF, J., SCHADENDORF, D., FERRUCCI, P. F., SMYLYE, M., DUMMER, R., HILL, A., HOGG, D., HAANEN, J., CARLINO, M. S., BECHTER, O., MAIO, M., MARQUEZ-RODAS, I., GUIDOBONI, M., MCARTHUR, G., LEBBÉ, C., ASCIERTO, P. A., LONG, G. V., CEBON, J., SOSMAN, J., POSTOW, M. A., CALLAHAN, M. K., WALKER, D., ROLLIN, L., BHOORE, R., HODI, F. S. and LARKIN, J. (2017). Overall survival with combined nivolumab and ipilimumab in advanced melanoma. *New England Journal of Medicine* **377** 1345–1356.
- XU, C., CHEN, Y.-P., DU, X.-J., LIU, J.-Q., HUANG, C.-L., CHEN, L., ZHOU, G.-Q., LI, W.-F., MAO, Y.-P., HSU, C., LIU, Q., LIN, A.-H., TANG, L.-L., SUN, Y. and MA, J. (2018). Comparative safety of immune checkpoint inhibitors in cancer: systematic review and network meta-analysis. *BMJ* k4226.
- YAMAZAKI, N., KIYOHARA, Y., UHARA, H., FUKUSHIMA, S., UCHI, H., SHIBAGAKI, N., TSUTSUMIDA, A., YOSHIKAWA, S., OKUYAMA, R., ITO, Y. and TOKUDOME, T. (2015a). Phase II study of ipilimumab monotherapy in Japanese patients with advanced melanoma. *Cancer Chemotherapy and Pharmacology* **76** 997–1004.
- YAMAZAKI, N., UHARA, H., FUKUSHIMA, S., UCHI, H., SHIBAGAKI, N., KIYOHARA, Y., TSUTSUMIDA, A., NAMIKAWA, K., OKUYAMA, R., OTSUKA, Y. and TOKUDOME, T. (2015b). Phase II study of the immune-checkpoint inhibitor ipilimumab plus dacarbazine in Japanese patients with previously untreated, unresectable or metastatic melanoma. *Cancer Chemotherapy and Pharmacology* **76** 969–975.
- YAMAZAKI, N., KIYOHARA, Y., UHARA, H., UEHARA, J., FUJIMOTO, M., TAKENOUCI, T., OTSUKA, M., UCHI, H., IHN, H. and MINAMI, H. (2017). Efficacy and safety of nivolumab in Japanese patients with previously untreated advanced melanoma: a phase II study. *Cancer Science* **108** 1223–1230.
- YOUNES, A., SANTORO, A., SHIPP, M., ZINZANI, P. L., TIMMERMAN, J. M., ANSELL, S., ARMAND, P., FANALE, M., RATANATHARATHORN, V., KURUVILLA, J., COHEN, J. B., COLLINS, G., SAVAGE, K. J., TRNENY, M., KATO, K., FARSACI, B., PARKER, S. M., RODIG, S., ROEMER, M. G. M., LIGON, A. H. and ENGERT, A. (2016). Nivolumab for classical Hodgkin's lymphoma after failure of both autologous stem-cell transplantation and brentuximab vedotin: a multicentre, multicohort, single-arm phase 2 trial. *The Lancet Oncology* **17** 1283–1294.
- ZIMMER, L., VAUBEL, J., MOHR, P., HAUSCHILD, A., UTIKAL, J., SIMON, J., GARBE, C., HERBST, R., ENK, A., KÄMPGEN, E., LIVINGSTONE, E., BLUHM, L., ROMPEL, R., GRIEWANK, K. G., FLUCK, M., SCHILLING, B. and SCHADENDORF, D. (2015a). Phase II DeCOG-study of ipilimumab in pretreated and treatment-naïve patients with metastatic uveal melanoma. *PLoS ONE* **10** e0118564.
- ZIMMER, L., EIGENTLER, T. K., KIECKER, F., SIMON, J., UTIKAL, J., MOHR, P., BERKING, C., KÄMPGEN, E., DIPPEL, E., STADLER, R., HAUSCHILD, A., FLUCK, M., TERHEYDEN, P., ROMPEL, R., LOQUAI, C., ASSI, Z., GARBE, C. and SCHADENDORF, D. (2015b). Open-label, multicenter, single-arm phase II DeCOG-study of ipilimumab in pretreated patients with different subtypes of metastatic melanoma. *Journal of Translational Medicine* **13**.
